# Androgens and Coronary Artery Disease

FREDRICK C. W. WU AND ARNOLD VON ECKARDSTEIN

Department of Endocrinology (F.C.W.W.), Manchester Royal Infirmary, University of Manchester, Manchester M13 9WL, United Kingdom; and Institute of Clinical Chemistry (A.v.E.), University of Zurich and University Hospital of Zurich, CH-8091 Zurich, Switzerland

A significant and independent association between endogenous testosterone (T) levels and coronary events in men and women has not been confirmed in large prospective studies, although cross-sectional data have suggested coronary heart disease can be associated with low T in men. Hypoandrogenemia in men and hyperandrogenemia in women are associated with visceral obesity; insulin resistance; low high-density lipoprotein (HDL) cholesterol (HDL-C); and elevated triglycerides, low-density lipoprotein cholesterol, and plasminogen activator type 1. These gender differences and confounders render the precise role of endogenous T in atherosclerosis unclear. Observational studies do not support the hypothesis that dehydroepiandrosterone sulfate deficiency is a risk factor for coronary artery disease.

The effects of exogenous T on cardiovascular mortality or morbidity have not been extensively investigated in prospective controlled studies; preliminary data suggest there may be short-term improvements in electrocardiographic changes in men with coronary artery disease. In the majority of animal experiments, exogenous T exerts either neutral or beneficial effects on the development of atherosclerosis. Exogenous androgens induce both apparently beneficial and deleterious effects on cardiovascular risk factors by decreasing serum

levels of HDL-C, plasminogen activator type 1 (apparently deleterious), lipoprotein (a), fibrinogen, insulin, leptin, and visceral fat mass (apparently beneficial) in men as well as women. However, androgen-induced declines in circulating HDL-C should not automatically be assumed to be proatherogenic, because these declines may instead reflect accelerated reverse cholesterol transport. Supraphysiological concentrations of T stimulate vasorelaxation; but at physiological concentrations, beneficial, neutral, and detrimental effects on vascular reactivity have been observed. T exerts proatherogenic effects on macrophage function by facilitating the uptake of modified lipoproteins and an antiatherogenic effect by stimulating efflux of cellular cholesterol to HDL.

In conclusion, the inconsistent data, which can only be partly explained by differences in dose and source of androgens, militate against a meaningful assessment of the net effect of T on atherosclerosis. Based on current evidence, the therapeutic use of T in men need not be restricted by concerns regarding cardiovascular side effects. Available data also do not justify the uncontrolled use of T or dehydroepiandrosterone for the prevention or treatment of coronary heart disease. (*Endocrine Reviews* 24: 183–217, 2003)

- I. Introduction
- II. The Gender Difference in Coronary Artery Disease
- III. Relationships between Serum Levels of T and CAD—Observational Studies
  - A. T and CAD in men
  - B. T and CAD in women
- IV. Relationships between Serum Levels of T and CAD—Interventional Clinical Studies
  - A. Endogenous androgen deprivation
  - B. Androgen excess from anabolic steroid abuse
  - C. Exogenous T treatment in men with CAD
  - D. Exogenous T treatment in women
- V. Relationships between Serum Levels of T and CAD—Animal Studies
- VI. Effects of T on Cardiovascular Risk Factors
  - A. Associations between endogenous T and cardiovascular risk factors: role of adipose tissue and insulin
  - B. Effects of puberty on cardiovascular risk factors
  - C. Effects of exogenous T on cardiovascular risk factors
- VII. Effects of T on Cells of the Arterial Wall and Vascular Function
  - A. Vascular expression of sex hormone receptors and T converting enzymes
  - B. Effects of T on vascular reactivity
  - C. Effects of T on macrophage functions
  - D. Effects of T on arterial smooth muscle functions
  - E. Effects of T on platelet functions
- VIII. DHEA(S) and CAD in Men and Women
- IX. Estrogens and Cardiovascular Disease in Men
- X. Summary and Conclusion
- XI. Clinical Implications

Abbreviations: AAS, Anabolic-androgenic steroid; apo, apolipoprotein; BMI, body mass index; CAD, coronary heart (artery) disease; CE, cholesterol ester; CETP, CE transfer protein; CI, confidence interval; DHEA, dehydroepiandrosterone; DHEAS, DHEA sulfate; EC, endothelial cell; ECG, electrocardiogram; ER, estrogen receptor; FFA, free fatty acids; HDL, high-density lipoprotein; HDL-C, HDL cholesterol; HL, hepatic lipase; LDL, low-density lipoprotein; LDL-C, LDL cholesterol; Lp(a), lipoprotein (a); MI, myocardial infarction; NCEH, neutral cholesterol esterase; NO, nitric oxide; OR, odds ratios; PAI-1, plasminogen activator type 1; PCOS, polycystic ovarian syndrome; SMC, smooth muscle cell; SR-B1, scavenger receptor B1; T, testosterone; VLDL, very LDL; WHR, waist-hip ratio.

## I. Introduction

ANDROGEN REPLACEMENT THERAPY has been used for over 60 yr to treat, with proven efficacy and safety, a relatively small number (estimated to be <0.5% of adult male population) of patients with male hypogonadal disorders and/or failure of sexual development. However, in

the last 10 yr, evidence has accumulated to support a wider therapeutic role of androgens for nonclassical indications (1). These include male contraception; aplastic anemia; and sarcopenic, osteopenic, and depressive states frequently associated with an expanding variety of chronic systemic conditions (characterized by reduced circulating testosterone, T) such as AIDS, rheumatoid arthritis, chronic renal failure, chronic obstructive airways disease, and physiological aging. Androgens are also being investigated as an additional component of hormone replacement therapy, in conjunction with estrogens, in postmenopausal women, especially in those who have had bilateral oophorectomy (2). We are poised on the threshold of witnessing a greatly expanded population of patients of all ages who may potentially benefit from the biological actions of T or related androgens.

Despite substantial reductions in mortality over the past 30 yr, heart disease remains the leading cause of death, claiming a total of 6.3 million lives worldwide in 1990. Ischemic heart disease, fifth in the rank order of disabilities in 1990, is predicted to become the leading global cause of disease burden by 2020 (3). It is well known that the age-adjusted morbidity and mortality rates from coronary heart disease (CAD) are 2.5- to 4.5-fold higher in men than in women and that the gender gap narrows after the menopause (4). The lifetime risk of CAD at the age of 40 yr is 1 in 2 for men and 1 in 3 for women (5). This male preponderance is remarkably consistent across 52 countries with hugely divergent rates of CAD mortality and lifestyles (6). The universality of gender disparity makes it likely that there is an intrinsic sexual dimorphism in susceptibility to CAD that may involve genetic, hormonal, lifestyle, or aging factors. The most popular explanation for this male preponderance in CAD is that adult male levels of T are proatherogenic, and/or there is a lack of the cardioprotective effects of estrogens in men. With the prospects of much wider therapeutic applications of androgens (for nonclassical indications), especially in the older age groups, an important clinical question is whether androgen treatment might increase the risk or severity of CAD. Being the most common cause of mortality and morbidity in men, even a tiny increase in the risk of CAD will not only negate any personal therapeutic benefits from androgen treatment but will also impose an unacceptable extra burden on health-care resources. This concern has become a major safety issue for androgen therapy.

The aim of this review is to summarize disparate and often conflicting data from a variety of disciplines into a global assessment of the relationship between androgens and CAD. It is based on MEDLINE searches up to April 30, 2002, using the following keywords: androgens, testosterone, dehydroepiandrosterone (DHEA), oestrogens (estrogens), androgen receptor, oestrogen (estrogen) receptor (ER), aromatase, 5 $\alpha$  reductase, polycystic ovary syndrome, hypogonadism, or hyperandrogenism in combination with cardiovascular disease, coronary heart (artery) disease, atherosclerosis, arteriosclerosis, diabetes mellitus, obesity, lipids, lipoproteins, hemostasis, coagulation, vascular reactivity, macrophage, endothelium, endothelial cell (EC), smooth muscle cell (SMC), or platelets. Only full published papers, but not conference abstracts, were included. No minimum criteria for inclusion of individual studies have been imposed; the in-

attention was to achieve comprehensive literature coverage. The relative merits and limitations of quoted information will be critically discussed in the text.

## II. The Gender Difference in Coronary Artery Disease

Male gender is one of the classic risk factors for CAD (7), and average life expectancy is some 8 yr less in males than females. Androgens or the lack of estrogens have traditionally been regarded as the proximate cause underlying this male disadvantage. However, the consistent 2.5–4.5:1 sex ratio in CAD across many countries compared with the ethnic/geographic disparity, with a 5- to 10-fold higher CAD mortality rates in eastern and northern Europe than in southern Europe and Japan (8), suggests that the gender effect is not as important as other risk factors that act on both men and women (Fig. 1). The narrowing of the gender gap after middle age, associated with a relative deceleration of CAD deaths in men and an absence of acceleration of CAD deaths perimenopausally in women, would also argue against a prime role for sex hormones in the pathogenesis of CAD (9). Nonhormonal factors may play a predominant part in the gender disparity in CAD. Interactions between a multiple genetic and environmental/lifestyle factors are important in the pathogenesis of atherosclerosis (10). Thus, uncommon genetic polymorphisms are responsible for a low background prevalence of CAD in both men and women. In addition, common genetic polymorphisms interact with classic risk factors to negate the protective genetic effects or enhance the deleterious actions of environmental or lifestyle variables (10). The gender-specific expression of candidate genes may involve diverse mechanisms ranging from *in utero* sex hormone imprinting on gender-specific behavior patterns and distribution of visceral body fat to vascular and myocardial structural and functional adaptation to aging, pressure overload, and disease (11). Gender differences are detectable in vascular endothelial functions (12, 13), lipid loading in human monocyte-derived macrophages (14), and abdominal visceral fat deposition (15). These mechanisms/factors will be discussed in more detail in the ensuing sections.

## III. Relationships between Serum Levels of T and CAD—Observational Studies

This section updates and modifies the excellent review of Alexandersen *et al.* (16), which was based on studies published between January 1982 and June 1995 that investigated the relationship between androgens (T and DHEA) and CAD in males. Because of the increased interest in DHEA since then, T and DHEA are dealt with separately in the present review. In perusing the clinical literature on this subject, it is clear that the reported endpoints for CAD were extremely variable [mortality, morbidity such as myocardial infarction (MI), angina, angiography, electrocardiogram (ECG), ultrasound, or postmortem-based diagnosis or unspecified cardiac events], study populations were heterogeneous, and selection criteria nonuniform. Types of study ranged from

### Age-adjusted death rates\* for coronary heart disease by country and sex, age 35-74

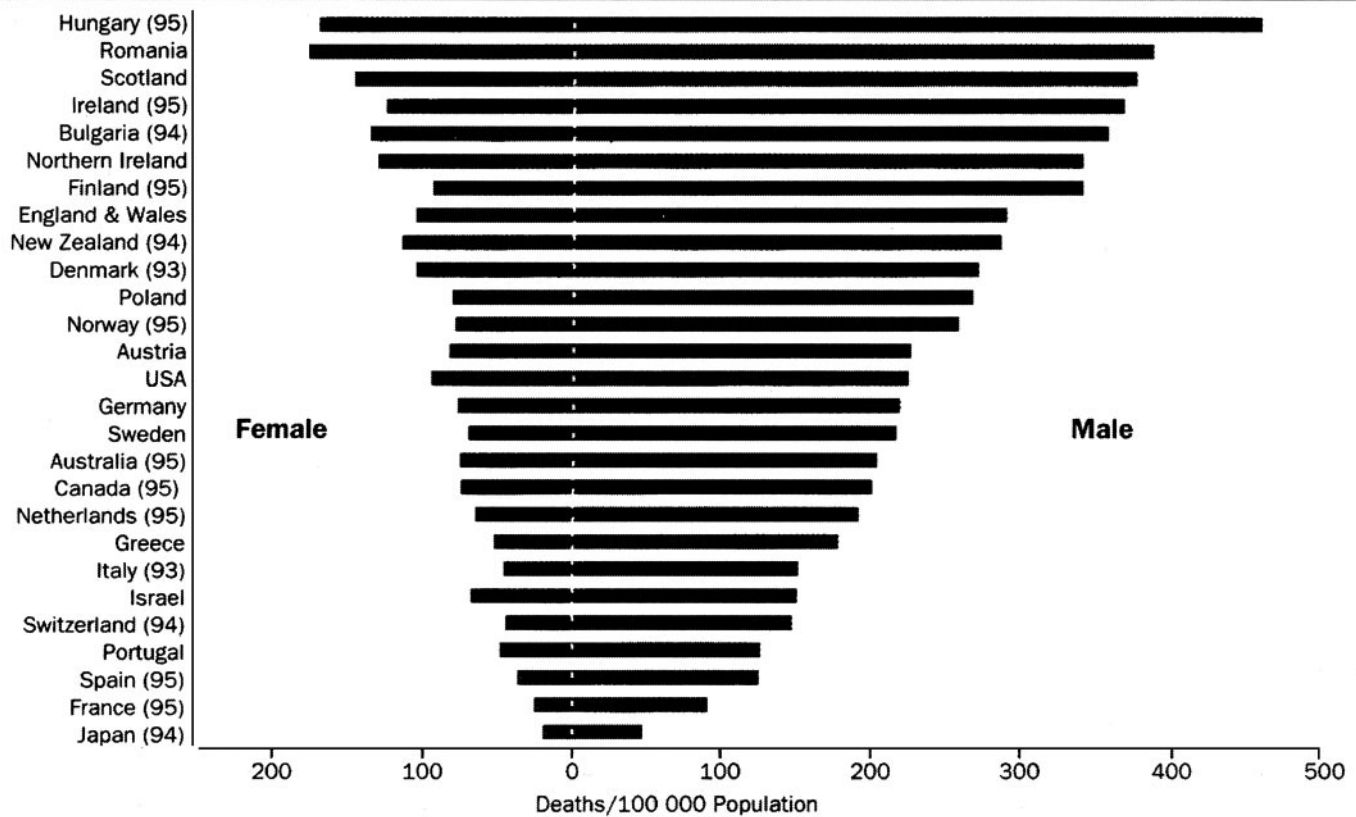

\*Age-adjusted to the European Standard; data for 1996 unless noted otherwise in parenthesis

FIG. 1. Age-adjusted mortality rates for CAD by country and sex (age 35–74 yr). Note the much higher difference in mortality between countries than between genders. A woman living in Scotland has a higher chance of dying from CAD than a man living in France (430).

cross-sectional/case-control and prospective nested case-control to longitudinal cohorts. Many studies were too small to draw valid conclusion, and adjustment had not always been made for confounders. Moreover, cross-sectional/case-control observational studies are subject to survivor bias (subjects with extreme levels of hormones have died), behavior change (*e.g.*, diet and lifestyle) and medical interventions (*e.g.*, medications) after diagnosis, and to the possibility that chronic illnesses including CAD lower serum levels of T (17). Studies of endogenous T may be further confounded by the diurnal variation (highest in the early morning) in circulating levels in younger but not older men (18) and an artifactual upward shift in assayed concentration of T due to a progressive alteration in frozen serum samples with time of storage (19). We have taken heed of these deficiencies of observational (especially cross-sectional) studies, and only those with adequate methodologies in terms of design, statistical power, hormone sampling/measurement, and allowance for confounders will be considered when drawing our overall conclusions. Studies will be summarized by their positive (higher androgens in cases), null, or negative (lower androgen levels in cases) relationships, together with information on study design, number of subjects, and the different diagnostic endpoints, to enable the reader to gain an impression of the power, validity, and quality of each study.

When available, odds ratios (OR) with 95% confidence interval (CI) will be provided to give additional indications of the quality of individual studies and the adequacy of statistical power.

#### A. T and CAD in men

Table 1 summarizes 39 studies (19–57) of the relationships between circulating T and CAD in men.

**1. Cross-sectional clinical studies.** Thirty-two cross-sectional studies (20–42, 44, 47, 49, 50, 53–57) are summarized in Table 1. Sixteen studies found lower levels of T in patients with CAD compared with healthy controls. Sixteen showed no difference in T levels between cases and controls. None suggested high levels of T were associated with CAD. It is important to reemphasize the limitations of these studies. For example, the largest study, the Caerphilly Heart Study with 2512 men (51), showed a modest reduction in T in survivors of MI. The association, however, became insignificant when adjusted for plasma insulin and triglycerides. In the second largest study, with 1709 community-dwelling subjects from the Massachusetts Male Aging Study (55), the clinical endpoint was self-reported treated heart disease, which predicts CAD (MI and angina) with 75% accuracy but was not dif-

TABLE 1. Relationships between circulating T levels and CAD in men

| First author, year (Ref.)        | n               | Study type                          | Hormone                | Endpoint                 | Relationship OR           |
|----------------------------------|-----------------|-------------------------------------|------------------------|--------------------------|---------------------------|
| Mendoza, 1983 (20)               | 52              | Cross-sectional                     | T                      | MI, angio                | Negative                  |
| Barth, 1983 (21)                 | 20              | Cross-sectional                     | T                      | CAD, angio               | Negative                  |
| Hromadova, 1985 (22)             | 67              | Cross-sectional                     | T                      | Coronary findings, angio | Negative                  |
| Breier, 1985 (23)                | 139             | Cross-sectional                     | T                      | CAD, angio               | Negative                  |
| Aksut, 1986 (24)                 | 54              | Cross-sectional                     | T                      | MI, angina               | Negative                  |
| Sewdarsen, 1986 (25)             | 56              | Cross-sectional                     | T, free T              | MI                       | Negative                  |
| Chute, 1987 (26)                 | 146             | Cross-sectional                     | T, free T              | CAD, angio               | Negative                  |
| Hämäläinen, 1987 (27)            | 57              | Cross-sectional                     | T, free T              | CHD, angio               | Negative                  |
| <b>Lichtenstein, 1987 (28)</b>   | <b>2512</b>     | <b>Cross-sectional</b>              | <b>T</b>               | <b>IHD</b>               | <b>Negative</b>           |
| Swartz, 1987 (29)                | 71              | Cross-sectional                     | T                      | MI                       | Negative                  |
| Sewdarsen, 1988 (30)             | 20              | Cross-sectional                     | T                      | MI, angio                | Negative                  |
| <b>Sewdarsen, 1990 (31)</b>      | <b>224</b>      | <b>Cross-sectional</b>              | <b>T</b>               | <b>MI</b>                | <b>Negative</b>           |
| Rice, 1993 (32)                  | 272             | Cross-sectional                     | T, free T              | MI                       | Negative                  |
| Phillips, 1994 (33)              | 55              | Cross-sectional                     | T, free T              | CAD, Angio               | Negative                  |
| Zhao, 1998 (34)                  | 201             | Cross-sectional                     | T                      | CAD                      | Negative                  |
| English, 2000 (35)               | 90              | Cross-sectional                     | T, free T, bio T       | CAD, angio               | Negative                  |
| Luria, 1982 (36)                 | 50              | Cross-sectional                     | T                      | MI                       | Null                      |
| Labropoulos, 1982 (37)           | 144             | Cross-sectional                     | T                      | MI                       | Null                      |
| Zumoff, 1982 (38)                | 117             | Cross-sectional                     | T                      | MI, CAD                  | Null                      |
| Phillips, 1983 (39)              | 122             | Cross-sectional                     | T                      | CHD                      | Null                      |
| Heller, 1983 (40)                | 295             | Cross-sectional                     | T                      | CHD                      | Null                      |
| Small, 1985 (41)                 | 100             | Cross-sectional                     | T                      | IHD                      | Null                      |
| Franzen, 1986 (42)               | 92              | Cross-sectional                     | T                      | MI                       | Null                      |
| Baumann, 1988 (44)               | 58              | Cross-sectional                     | T                      | Atherosclerosis          | Null                      |
| Slowinska-Srzednicka, 1989 (47)  | 108             | Cross-sectional                     | T                      | MI, Angio                | Null                      |
| Cengiz, 1991 (49)                | 55              | Cross-sectional                     | T                      | MI, angina               | Null                      |
| Hauner, 1991 (50)                | 274             | Cross-sectional                     | T                      | CAD, angio               | Null                      |
| Mitchell, 1994 (53)              | 98              | Cross-sectional                     | T, free T              | MI                       | Null                      |
| Marquez-Vidal, 1995 (54)         | 116             | Cross-sectional                     | T                      | MI                       | Null                      |
| <b>Feldman, 1998 (55)</b>        | <b>1709</b>     | <b>Cross-sectional</b>              | <b>T, free T</b>       | <b>Heart disease</b>     | <b>Null 0.8</b>           |
| Kabacki, 1999 (56)               | 337             | Cross-sectional                     | T, free T              | CAD, angio               | Null                      |
| Schuler-Lüttmann, 2000 (57)      | 189             | Cross-sectional                     | T, free T index        | CAD, angio               | Null                      |
| <b>Cauley, 1987 (43)</b>         | <b>163, 163</b> | <b>Nested case-control 6–8 yr</b>   | <b>T, free T</b>       | <b>MI</b>                | <b>Null 1.1 (0.7–1.9)</b> |
| <b>Barrett-Connor, 1988 (45)</b> | <b>1009</b>     | <b>Prospective cohort 12 yr</b>     | <b>T</b>               | <b>IHD</b>               | <b>Null 1.1 (0.8–1.3)</b> |
| <b>Phillips, 1988 (46)</b>       | <b>96, 96</b>   | <b>Nested case-control 19–20 yr</b> | <b>T</b>               | <b>MI</b>                | <b>Null</b>               |
| <b>Contoreggi, 1990 (48)</b>     | <b>46, 124</b>  | <b>Nested case-control 9.5 yr</b>   | <b>T</b>               | <b>CAD</b>               | <b>Null</b>               |
| <b>Yarnell, 1993 (51)</b>        | <b>2512</b>     | <b>Prospective cohort 5 yr</b>      | <b>T</b>               | <b>CHD</b>               | <b>Null 1.1 (0.9–1.3)</b> |
| <b>Hautanen, 1994 (52)</b>       | <b>62, 97</b>   | <b>Nested case-control 5 yr</b>     | <b>T</b>               | <b>Cardiac endpoints</b> | <b>Null</b>               |
| <b>Harman, 2001 (19)</b>         | <b>890</b>      | <b>Prospective cohort 31 yr</b>     | <b>T, free T index</b> | <b>CAD</b>               | <b>Null</b>               |

Negative relationship indicates lower T levels in patients with CAD compared to controls, and a null relationship indicates no difference between cases and controls. For prospective cohort or nested case-control studies, the number of cases (first n) and controls (second n) and duration under study are listed. Highlighted in *bold* are the most important studies in terms of adequacy of design, statistical power, and allowance for confounding factors.

Free T, Unbound T measured by equilibrium dialysis or analog assay; free T index, unbound T derived from total T and SHBG; bio T, bioavailable (non-SHBG-bound) T; angio, coronary angiography; IHD, ischemic heart disease.

ferentiated from congestive heart failure. This study, however, did rule out any potential confounding effects of cardiac medications including vasodilators, antihypertensives, and lipid-lowering agents. The latter is important because the effective lowering of circulating cholesterol may reduce the substrate for steroidogenesis, and high-dose simvastatin was confirmed to lower total and free T after 12-wk treatment (58). Phillips *et al.* (33) demonstrated a significant dose-dependent negative relationship between free T (measured with the analog assay) and the degree of coronary arterial occlusion in 55 men undergoing angiography who had not previously had MI. The authors suggested, overenthusiastically in our view, that low circulating T might be a risk

marker for coronary atherosclerosis. It is also of interest that, in a few studies in which both T and dehydroepiandrosterone sulfate (DHEAS) were measured (see *Section VIII*), T showed no difference between cases and controls, whereas DHEAS was decreased (47, 53, 55, 57), suggesting that different mechanisms, probably not mediated by the androgen receptor, may underlie the potential relationships between these two hormones and CAD.

2. *Prospective cohort or nested case-control studies.* Table 1 also summarizes the seven non-cross-sectional studies (19, 43, 45, 46, 48, 51, 52). None of these studies showed T to have any significant relationship or predictive value for incident CAD.

The three prospective cohort studies followed 1009 Californian (Rancho Bernardo) men aged 40–79 yr over a 12-yr period (45), 2512 men aged 45–59 yr in the United Kingdom (Caerphilly) for a 5-yr period (51), and 890 largely middle-class and 87% Caucasian (Baltimore) men aged  $53.8 \pm 16$  yr for a period up to 31 yr (19). There was no correlation between baseline T levels and subsequent development of fatal or nonfatal CAD, stroke, or heart failure after adjusting for relevant confounders. Despite the concern that only a single hormone measurement at recruitment was undertaken and possible storage artifact, the relatively large size and long follow-up period of these three cohort studies go a long way toward confirming that T is not an independent risk factor for CAD in men.

In the four nested case-control studies, baseline T levels in cases of CAD and matched controls from the Honolulu Heart Program (43), Multiple Risk Factors Interventional Trial (46), Baltimore Longitudinal Study of Ageing (Ref. 48, the earlier and shorter version of Ref. 19), and the Helsinki Heart Study (52) did not predict CAD events during observation periods of 6–8, 19–20, 9.5, and 5 yr, respectively.

In summary, the seven prospective studies provide a consistent and convincing data set that shows the lack of a relationship between circulating T and incident or existing CAD in men. There is a suggestion, only from cross-sectional studies, that patients with CAD may have lower T levels; the nature of this relationship is unclear. None of the 39 studies in the literature showed a positive relationship between T and CAD to suggest that high levels of this androgen may be a risk factor.

### B. T and CAD in women

There are relatively few studies that investigated the relationship between endogenous levels of androgens and CAD in women (Table 2A). Age-adjusted concentrations of

T, bioavailable T, and androstenedione did not differ significantly in 651 postmenopausal women, from the Rancho Bernardo study, with and without a history of heart disease at baseline and did not predict cardiovascular death or death from ischemic heart disease during the subsequent 19 yr (59). In contrast, in a cross-sectional angiographic study of 109 postmenopausal women with chest pain, serum levels of free T were correlated with the maximum percentage reduction of the luminal diameter of coronary arteries. This correlation was independent of age, body mass index (BMI), systolic blood pressure, smoking, or levels of cholesterol, insulin, and estradiol (60). However, higher free T and androstenedione within the physiological range had also been correlated with less carotid artery atherosclerosis in premenopausal and postmenopausal women (61).

1. *Polycystic ovarian syndrome (PCOS)*. Indirect evidence for the atherogenicity of androgens in women comes from clinical observational studies in women with PCOS. Much has been written recently about the potentially increased CAD risk in patients with PCOS (62–70). This is based on cross-sectional data that consistently showed a strong obesity-independent cluster of cardiovascular risk factors including insulin resistance, dyslipidemia, and impaired fibrinolysis in patients with PCOS. This has given rise to the view that the chronically abnormal hormonal and metabolic milieu in PCOS, starting from adolescence, may predispose these women to premature atherosclerosis. Based on calculated risk profiles, women with PCOS were predicted to have a relative risk for MI of 7.4:1 (71).

Wild *et al.* (72) assessed the waist-hip ratio (WHR) and previous history of symptomatic androgen excess (hirsutism and acne) in 102 consecutive women undergoing cardiac catheterization. A positive correlation between angiographic evidence of coronary artery disease and clinical evidence of hyperandrogenism was found (Table 2B). In a combined

TABLE 2. Relationships between circulating T levels and CAD in women (A) and between PCOS and CAD in women (B)

| First author, year (Ref.)        | n          | Study type                      | Hormone (A)/phenotype (B) | Endpoint               | Relationship OR             |
|----------------------------------|------------|---------------------------------|---------------------------|------------------------|-----------------------------|
| <b>A</b>                         |            |                                 |                           |                        |                             |
| Phillips, 1997 (60)              | 109        | Cross-sectional                 | Free T                    | Coronary Angio         | Positive                    |
| Bernini, 1999 (61)               | 101        | Cross-sectional                 | Free T, A                 | CIMT                   | Negative                    |
| <b>Barrett-Connor, 1995 (59)</b> | <b>651</b> | <b>Prospective cohort 19 yr</b> | <b>T, bio T, A</b>        | <b>CVD mortality</b>   | <b>Null 1.0 (0.99–1.03)</b> |
| <b>B</b>                         |            |                                 |                           |                        |                             |
| Wild, 1990 (72)                  | 102        | Cross-sectional                 | Hirsutism/acne            | Coronary Angio         | Positive                    |
| Birdsall, 1997 (73)              | 143        | Cross-sectional                 | Pelvic USS, PCOS          | Coronary Angio         | Positive                    |
| Guzick, 1996 (74)                | 16, 16     | Cross-sectional                 | PCOS, T                   | CIMT                   | Positive                    |
| Talbott, 2000 (75)               | 47, 60     | Cross-sectional                 | PCOS, T                   | CIMT                   | Positive                    |
| Cibula, 2000 (76)                | 28, 752    | Cross-sectional                 | PCOS <sup>a</sup>         | Various CAD            | Positive                    |
| Christian, 2000 (77)             | 32, 52     | Cross-sectional                 | PCOS                      | Coronary calcification | Positive                    |
| Mather, 2000 (78)                | 18, 19     | Cross-sectional                 | PCOS, T                   | Vascular responses     | Null                        |
| Pierpoint, 1998 (79)             | 786        | Historical prospective cohort   | PCOS                      | CVD mortality          | Null SMR 1.4 (0.8–2.4)      |
| Wild, 2000 (80)                  | 319        | Historical prospective cohort   | PCOS                      | CVD                    | Null 1.2 (0.5–2.6)          |
| Elting, 2001 (81)                | 346        | Retrospective clinic survey     | PCOS                      | Cardiac complaints     | Null                        |

T, Total T; free T, unbound T measured by equilibrium dialysis or analog assay; bio T, bioavailable (non-SHBG-bound) T, including albumin-bound fraction; A, androstenedione; CIMT, carotid artery intima-media thickness; USS, ultrasound; angio, angiography; SMR, standardized mortality.

Highlighted in *bold* is the most important study in terms of adequacy of design, statistical power, and allowance for confounding factors.

<sup>a</sup> Patient who had ovarian wedge resection.

angiography and pelvic ultrasound study of 143 women aged 60 yr or less who were referred because of chest pain or valvular heart disease, the presence of polycystic ovaries (in 42% of patients) was associated with an increased number of stenosed coronary arteries (73). Moreover, the presence of CAD and a family history of MI as well as elevated levels of insulin and triglycerides and lower levels of high-density lipoprotein (HDL)-cholesterol (HDL-C) were independent predictors of polycystic ovaries. The prevalence of CAD (history of chest pain, MI, angioplasty, or coronary artery bypass grafts) was found to be significantly higher in 28 women (45–59 yr old) who had undergone ovarian wedge resection over 18 yr ago compared with 752 age-matched controls (76). The low response rate in the cases (<50%) and the uncertain diagnosis of CAD based on history of possible angina or MI make the data in this study difficult to interpret. In cross-sectional studies using B-mode ultrasound, significantly increased carotid artery intima-media thickness was found in patients with PCOS compared with age-matched controls (74, 75). This was not entirely explained by BMI, fat distribution, and other risk factors and may be regarded as evidence in support of subclinical premature atherosclerosis in middle-aged (>45 yr) women independently related to the increased T in PCOS. Similarly, a recent study (77) demonstrated an increased prevalence of coronary artery calcification (which correlates with atherosclerosis) in 32 premenopausal (30–45 yr old) women with PCOS compared with 52 controls using electron beam computed tomography. These three studies employed noninvasive markers of early atherosclerosis to demonstrate an excessive risk for subclinical cardiovascular disease in relatively young PCOS patients. The data require confirmation with larger numbers and prospective follow-up. However, despite marked differences in glucose/insulin ratio and free androgen index in 18 healthy, obese, young women ( $32.7 \pm 1.9$  yr) with PCOS, insulin resistance, hyperandrogenism, and endothelium-dependent and -independent vascular responses were normal compared with age-matched controls (78).

In terms of actual cardiovascular disease events associated with PCOS, there is information from only two long-term longitudinal studies. Mortality and morbidity over an average 30 yr in 786 of 1028 women (over 45 yr of age) diagnosed to have PCOS on histopathological and hospital in-patient diagnostic records between 1930 and 1979, most of whom underwent ovarian wedge resection, were compared retrospectively with 1060 age-matched control women. Despite the significantly increased diabetes, hypertension, cholesterol, and nonfatal cerebrovascular disease, the standardized mortality ratio for CAD of 1.4 (95% CI, 0.8–2.4) and OR for a history of CAD of 1.2 (95% CI, 0.5–2.6) were not significantly raised (79, 80). In a recent Dutch cohort of 346 nonobese patients aged 30.3–55.7 yr diagnosed to have PCOS in a specialized clinic 12 yr (range 1.2–31.6) previously, the prevalence of cardiac complaints (serious heart disease or cardiac arrest) ascertained by telephone questionnaire was not significantly different from that in 8950 age-matched females in the general population, despite the higher prevalence of both diabetes and hypertension (81). This suggests that previous estimates of CAD risk in PCOS may have been somewhat excessive. However, both these studies suffer

from methodological drawbacks such as underascertainment of PCOS (79, 80) and the relative young age of the smaller cohort (81).

Endogenous T is unlikely to have a causal or protective role for CAD in women. On the other hand, there is little doubt that PCOS patients (younger women of reproductive age) have an adverse risk profile for cardiovascular disease. However, whether this leads to increased, premature heart disease and, if so, whether this is causally related to chronic hyperandrogenemia *per se*, as opposed to associated variables, remain unresolved questions. Nevertheless, it is important not to dismiss the possibility of an association between PCOS and CAD events (probably independent of T). Given the high prevalence of PCOS in the female population, this should remain a high priority target for future research.

#### IV. Relationships between Serum Levels of T and CAD—Interventional Clinical Studies

##### A. Endogenous androgen deprivation

A frequently cited study (82) compared the life span of 297 castrated inmates with 735 intact inmates (white males) in a single state institution for the mentally retarded in Kansas between 1895 and 1950. The reasons for castration were unclear. Castrated males lived an average of 13.6 yr longer than intact controls. However, the excess mortality in intact inmates was due to infections with no difference in cardiovascular disease mortality between the two groups. The authors concluded that postpubertal castration did not decrease the frequency of deaths due to cardiovascular disease. In a historical review (83), the life span of 50 castrated singers (prepubertal castrates) born between 1581 and 1858 in Europe was  $65.5 \pm 13.8$  yr compared with  $64.3 \pm 14.1$  yr in 50 noncastrated singers. In another historical survey of castration, Wilson and Roehrborn (84) also concluded that there are no valid data indicating that castration has any effect on life span of men. Doubts about ascertainment accuracy and the small size of these historical studies make it difficult to draw clear conclusions. The findings are, however, consistent with findings from cross-gender sex-hormone treatment in 816 male-to-female transsexuals aged 18–86 yr (mean, 41 yr; Ref. 85). Administration of ethinyl-estradiol (100  $\mu$ g/d) and cyproterone acetate (100 mg/d) for 7734 patient-years was not associated with any significant difference in cardiovascular mortality or morbidity compared with the general male population, despite a 20-fold increase in venous thromboembolic complications.

##### B. Androgen excess from anabolic steroid abuse

Excessive T exposure in men is uncommon in clinical practice. However, anabolic-androgenic steroid (AAS) abuse in the general population is said to have reached epidemic proportion, with over 1 million current and former users in the United States alone (86–88). In two reviews of the literature covering a 12-yr period from 1987–1998 (89, 90), there was a total of 17 case reports of cardiovascular events in young male body builders using suprapharmacological doses of AAS. Invariably, multiple preparations seldom pre-

scribed in clinical practice, including oral  $17\alpha$ -alkylated androgens, are used in combination simultaneously. There are 11 documented cases of acute MI, 4 cardiomyopathy, and 2 strokes. It is not possible to draw firm scientific conclusions from these sporadic case reports, especially when the baseline denominator information on prevalence and extent of exposure is shrouded in uncertainty and secrecy. But with the vast increase in abuse since the 1960s (86, 87, 89), there is no clear evidence for an epidemic of cardiovascular events among likely users and ex-users of AAS. A formal case-control study of AAS abuse in younger men presenting with acute MI has not been performed. Nevertheless, it has been suggested that dose-dependent androgen-induced vasospasm, platelet aggregation, activation of coagulation cascade, atherogenic lipid profiles [increased low-density lipoprotein (LDL)-cholesterol (LDL-C) and decreased HDL-C], and abnormal left ventricular function and hypertrophy are relevant mechanisms precipitating sudden cardiac deaths in young power athletes and body builders (90). It must be emphasized that pathological data from men abusing exotic AASs in doses several orders of magnitude higher than those prescribed in the clinical setting should not be extrapolated to the legitimate medical therapeutic use of approved T preparations or indeed to androgen physiology.

#### C. Exogenous T treatment in men with CAD

There are 17 reports in the literature documenting the effects of therapeutic doses of T in men with CAD. All showed some improvement or beneficial effects. The early studies from the 1940s are of historical interest only because of the small number of patients included and the uncontrolled observations (91–101).

Webb and colleagues (102, 103) showed that a single iv bolus of 2.3 mg of T increased the time to 1-mm ST-segment depression on ECG by 66 sec (15–117,  $P < 0.016$ ) in 14 men with CAD and low plasma T. The plasma T increased from 5.2–117 nmol/liter, indicating that this is a pharmacological action on the coronary vasculature. These direct acute pharmacological effects of T have been further studied during coronary angiography. Webb and colleagues (102, 103) infused T over 3 min into the coronary arteries of 13 men with established CAD during coronary angiography at doses of  $10^{-7}$  to  $10^{-10}$  mol/liter (8  $\mu$ mol/liter to 8 nmol/liter). Coronary vessel diameter increased by 3.1–4.5% at the three higher doses but not at the physiological dose of  $10^{-10}$  mol/liter. Coronary artery blood flow increased by 12–17.4% at all four doses of T. These effects were mediated by endothelium-independent and nongenomic mechanisms. This is the first demonstration of a direct vasodilatory action of T on coronary arteries *in vivo* in human males. These results have been confirmed by a similar study (104) in 14 men with established CAD. Intravenous infusion of 2.5 mg of T prolonged time to 1-mm ST depression from 471–579 sec and increased total exercise time from 541–631 sec. Whether the acute vasodilatory action of T at pharmacological doses translates into physiological therapy remains to be determined (also see Section VII.B).

Jaffe (105) reported the first randomized placebo-controlled double-blind study investigating the effects of T

cypionate (200 mg im weekly) in 50 men with positive exercise ECG ( $n = 25$  in each group). The sum of ST-segment depression in leads II, V4, V5, and V6 immediately 2, 4, and 6 min after the standard two-step exercise test (16 measurements in all) decreased by 32% and 51% from baseline after 4 and 8 wk in the active group with no change in the placebo group. There was no mention of any symptomatic improvement. Wu and Weng (106) reported another randomized placebo-controlled crossover (but not double-blinded) study in 62 elderly men with CAD treated with oral T undecanoate or placebo for 4 wk. T increased from 17–27 nmol/liter on T undecanoate (120–40 mg daily). The response categories were established by the Chinese Ministry of Public Health and denoted as very effective, effective, ineffective, worsened, and total efficacy but were not defined further. Both subjective symptom scores and resting ECG were improved in 69% and 75% of subjects, respectively, after 4 wk of treatment. In a recent study, English *et al.* (107) investigated the effects of a physiological dose of transdermal T (5 mg daily) for 12 wk in 50 patients with symptomatic CAD in a double-blind randomized placebo-controlled add-on trial. Plasma T increased from 13.6–22.3 and 18.6 nmol/liter after 4 and 12 wk of T treatment. The time to 1-mm ST-segment depression increased from 309–343 at wk 4 and 361 sec at wk 12 in the treated and from 266–284 at wk 6 and 292 sec at wk 12 in the placebo group ( $P < 0.02$ , treated *vs.* placebo).

These preliminary data suggest short-term improvements in ECG changes of CAD after (maximum of 12 wk) T supplement. Whether there are real symptomatic or functional benefits or decreased mortality in the long term remain important but unanswered questions.

#### D. Exogenous T treatment in women

The possible physiological roles of androgens in women may include increasing libido, energy, bone mineral density, muscle mass, and strength, but the data to support these possible roles are currently limited and not entirely convincing (108). Although hypopituitary (109) and bilaterally ovariectomized females (110) are undoubtedly androgen deficient, circulating T is only minimally lower after the natural menopause because ovarian secretion is maintained (111, 108). Nevertheless, there is increasing interest in the use of T as part of postmenopausal hormone replacement therapy, in particular to improve reported impaired sexual function (2, 112). Whether the concurrent use of T will impact the effects of estrogen hormone replacement therapy on the cardiovascular system is currently unknown. In a 20-yr (1975–1994) retrospective survey of the Amsterdam Gender Dysphoria Clinic (85), 293 female-to-male transsexuals aged 17–70 yr (mean, 34 yr) were treated for 2 months to 41 yr (total exposure of 2418 patient-years) with oral T undecanoate (160 mg daily) or T (Sustanon; 250 mg im every 2 wk). There was no excess of cardiovascular mortality (all cause) or morbidity compared with the general female Dutch population. However, there is currently insufficient evidence to exclude harmful cardiovascular effects of T treatment in women.

In summary, interventional studies to decrease endogenous T or administration of T generally do not suggest a causal relationship between T exposure and the develop-

ment of CAD. Although some preliminary information hints at possible beneficial effects on myocardial ischemia, prospective controlled data on cardiovascular disease endpoints (MI, angina, mortality) from large-scale interventional studies using physiological doses of androgens are currently lacking.

### V. Relationships between Serum Levels of T and CAD—Animal Studies

The influence of androgens on the development and progression of experimentally induced atherosclerosis has been investigated in six animal models with diet- or injury-induced atherosclerosis and in two genetic atherosclerosis-susceptible mouse models (Refs. 113–122 and Table 3). Larsen *et al.* (114) investigated the effects of im T enanthate in castrated male rabbits and found no difference in the cholesterol content of abdominal aorta lesion after 17 wk. A similar negative result was obtained with the anabolic steroid stanozolol (115). Bruck *et al.* (118) demonstrated gender-

specific effects of T and estradiol in castrated male and female rabbits fed an atherogenic diet. After 12 wk, aortic arch atheroma formation was significantly inhibited by im estradiol valerate (1 mg/kg-wk) in females but not in males, by T enanthate (25 mg/kg-wk) in males but not in females, and by combined estradiol and T administration in both sexes. Interestingly, T treatment in female rabbits increased plaque sizes, but estradiol had no effect in male rabbits. The authors concluded that the antiatherogenic effects of sex steroids involve gender-specific mechanisms and are independent of changes in plasma lipids. T did not have any effect on the myointimal proliferation response to balloon injury of the carotid artery *in vivo* in either male or female intact or gonadectomized rats, whereas estradiol inhibited this response in both sexes (117). Alexandersen *et al.* (119) showed that castration *per se* in male rabbits resulted in a doubling of aortic atherosclerosis compared with sham-operated controls, suggesting that endogenous T has an antiatherogenic effect. This can be reversed by oral T undecanoate (80 mg daily) or DHEA (500 mg daily) via a lipid-dependent mech-

TABLE 3. Relationship between androgens and atherosclerosis in animals fed atherogenic cholesterol-enriched diets or after vessel injury

| First author, year (Ref.) | Model                                            | n    | Duration     | Hormone                                   | Endpoints                                                       | Effect on atherosclerosis                                                                   |
|---------------------------|--------------------------------------------------|------|--------------|-------------------------------------------|-----------------------------------------------------------------|---------------------------------------------------------------------------------------------|
| Toda, 1984 (113)          | Male chicks                                      | 24   | 7 wk         | T                                         | Aortic atherosclerosis                                          | Increase                                                                                    |
| Larsen, 1993 (114)        | Male odx rabbits                                 | 36   | 17 wk        | T                                         | Abdominal aorta cholesterol                                     | Null                                                                                        |
| Adams, 1995 (116)         | Female ovx monkeys                               | 64   | 24 months    | T                                         | Coronary artery plaque size                                     | Increase <sup>a</sup>                                                                       |
| Chen, 1996 (117)          | Male odx rats                                    | 30   | 14 d         | T & E2                                    | Myointimal proliferation after balloon injury of carotids       | T null, E2 decreased in both sexes                                                          |
|                           | Female ovx rats                                  | 23   |              |                                           |                                                                 |                                                                                             |
| Bruck, 1997 (118)         | Male odx rabbits                                 | 32   | 12 wk        | T & E2                                    | Aortic plaque size                                              | T decreases in male, E2 decreases in female, T increases in female                          |
|                           | Female ovx rabbits                               | 32   |              |                                           |                                                                 |                                                                                             |
| Alexandersen, 1999 (119)  | Male odx rabbits                                 | 100  | 30 wk        | T                                         | Aortic atherosclerosis                                          | Decrease                                                                                    |
| Elhage, 1997 (121)        | Male apoE <sup>-/-</sup> odx mice <sup>b</sup>   | 70   | 8 wk         | T & E2                                    | Aortic fatty streak lesions                                     | Castration null, T and E2 decrease in both sexes                                            |
|                           | Female apoE <sup>-/-</sup> ovx mice <sup>b</sup> | 70   |              |                                           |                                                                 |                                                                                             |
| von Dehn, 2001 (122)      | Male apoE <sup>-/-</sup> mice <sup>b</sup>       | 19   | 8 wk         | Cetrorelix <sup>c</sup> , T               | Aortic fatty streak lesions                                     | Cetrorelix <sup>c</sup> decreases in both sexes, T increases in male, T decreases in female |
|                           | Female apoE <sup>-/-</sup> mice <sup>b</sup>     | 19   |              |                                           |                                                                 |                                                                                             |
| Nathan, 2001 (122a)       | Male LDLR <sup>-/-</sup> mice <sup>d</sup>       | 6–11 | 8 wk         | Orchidectomy, T & E2, aromatase inhibitor | Aortic fatty streak lesions                                     | Castration increases, T & E2 decrease but reversed by aromatase inhibitor                   |
| Fogelberg, 1990 (115)     | Male rabbits                                     | 17   | 12 wk        | Stanozolol                                | Aortic atherosclerosis                                          | Null                                                                                        |
| Obasanjo, 1996 (120)      | Female ovx monkeys                               | 52   | 12–24 months | Nandrolone                                | Coronary plaque & lumen size                                    | Increase <sup>e</sup>                                                                       |
| Gordon, 1988 (405)        | Male rabbits                                     | 34   | 12 wk        | DHEA                                      | Aortic atherosclerosis following balloon-induced intimal injury | Decrease                                                                                    |
| Arad, 1989 (406)          | Male rabbits                                     | 15   | 8 wk         | DHEA                                      | Aortic fatty streak                                             | Decrease                                                                                    |
| Eich, 1993 (407)          | Male rabbits heterotopic cardiac transplants     | 48   | 5 wk         | DHEA                                      | Graft atherosclerosis                                           | Decrease                                                                                    |
| Alexandersen, 1999 (119)  | Male odx rabbits                                 | 100  | 30 wk        | DHEA                                      | Aortic atherosclerosis                                          | Decrease                                                                                    |
| Hayashi, 2000 (408)       | Female ovx rabbits                               | 48   | 10 wk        | DHEA                                      | Aortic atherosclerosis                                          | Decrease                                                                                    |

ovx, Ovariectomized; odx, orchidectomized; E2, estradiol.

<sup>a</sup> T reversed atherosclerosis-related impairment of endothelium-dependent vasodilation response, *i.e.*, functional benefit.

<sup>b</sup> apoE<sup>-/-</sup> mice, apoE-deficient knockout mice.

<sup>c</sup> Cetrorelix, GnRH antagonist.

<sup>d</sup> LDLR<sup>-/-</sup> mice, LDL-receptor-deficient knockout mice.

<sup>e</sup> Nandrolone treatment for 12 months increased coronary artery lumen size despite increased atherosclerotic plaque size.



anism. In addition, im T enanthate (25 mg twice weekly), which raised circulating T levels by 10-fold, decreased aortic atherosclerosis by lipid-independent mechanisms. This suggests that androgens in pharmacological doses may exert antiatherogenic effects on the vasculature. In contrast, treatment of male chicks with T resulted in a dose-dependent increase in aortic atherosclerosis (113). Similarly, in female ovariectomized cynomolgus monkeys fed an atherogenic diet for 24 months, the extent of coronary atherosclerosis was doubled with loss of compensatory remodeling of the arterial lumen in the T-treated group compared with the intact and untreated ovariectomized controls (116). These effects were independent of various risk factors including lipids. However, the acetylcholine-induced atherosclerosis-related coronary artery vasoconstriction was reversed by T treatment. Thus, despite the adverse pathomorphological changes in the arterial wall, functional parameters of the endothelium nevertheless improved upon treatment with T (116). It should also be pointed out that the SILASTIC-brand (Dow Corning Corp., Midland, MI) T implants used failed to maintain T levels (0.6 nmol/liter) in the adult male physiological range in the ovariectomized animals. These results may therefore be more relevant to atherogenesis in androgenized females, *e.g.*, PCOS, rather than males. With the same experimental model and design, Obasanjo *et al.* (120) showed that coronary artery atherosclerosis was significantly increased by the AAS nandrolone for 2 yr compared with the intact sham-operated group ( $P < 0.05$ ) but not with the ovariectomized placebo group. The groups administered nandrolone had significantly larger arteries than the other two groups. Lumen area was significantly larger in the group given nandrolone for 1 yr (deferred start by 12 months) compared with all other groups ( $P < 0.05$ ). Remodeling of the vessel wall and lumen could possibly counterbalance the increased plaque size. In view of these inconsistent results and the major gender-specific action of T (118), it should be emphasized that data obtained on experimentally induced atherosclerosis in female animals should not be extrapolated to males. To date, no experimental studies have been performed to investigate the effects of androgens on the mechanisms underlying atherosclerosis in male monkeys.

Three studies investigated the effect of castration and exogenous T on atherosclerosis in atherosclerosis-susceptible genetically engineered mice. In the study by Elhage *et al.* (121), castration had no effect on atherosclerosis of either male or female mice. Application of 7.5-mg T pellets increased T serum levels from undetectable to 1.3 ng/ml in females and from 0.5–1.7 ng/ml T in males. Compared with intact and castrated control animals, application of T significantly decreased serum levels of cholesterol and inhibited the development of fatty streak lesions in the sinus aortae by about 30% in both sexes. In the study by von Dehn *et al.* (122), the animals received either 100  $\mu$ g of the GnRH antagonist Cetrorelix every 48 h or a 35-mg implant of T. Suppression of T led to a decrease in atherosclerosis in both the sinus aortae and the ascending aorta despite increases of cholesterol in male and decreases of HDL-C in female mice. Treatment with T increased serum levels to 6.1 ng/ml in male mice and to small but significant increases of cholesterol levels and atherosclerotic lesions in male mice. Despite an increase of T

levels to 10.1 ng/ml, female mice showed no change in lipids and fewer atherosclerotic lesions. In LDL-receptor-deficient male mice (122a), both castration and the aromatase inhibitor anastrozole increased the extent of fatty streak lesions in the aortic arch compared with control mice. Lesion formation was attenuated by treatment of orchidectomized animals with either T or estradiol. The atheroprotective effect of T was abolished by the simultaneous application of anastrozole. These results suggest that T attenuates early atherogenesis by being aromatized to estrogens (see *Section IX*). The discrepancy between these three studies may partly be explained by the different dosages of T and gender-specific actions. The effects of T on early atherogenesis were not explained by changes in lipid levels in any of these three studies.

In summary, various animal models have highlighted the existence of many different mechanisms in the evolution of atherosclerosis that can potentially be influenced by androgens. The inconsistent and conflicting results from these *in vivo* studies reflect the complexity of pathogenesis, the sexually dimorphic response to atherogenic triggers, as well as the gender-specific response to sex steroids.

## VI. Effects of T on Cardiovascular Risk Factors

The effects of T on cardiovascular risk factors are contradictory depending on whether associations with endogenous T or effects of exogenous T have been investigated.

### A. Associations between endogenous T and cardiovascular risk factors: role of adipose tissue and insulin

Several cross-sectional population studies found statistically significant correlations between plasma levels of T and various cardiovascular risk factors that appear to be profoundly influenced by the interrelationships between T, adipose tissue, and insulin action. Furthermore, T showed opposite relationships with risk factors in men and women.

1. *Observations in men.* In men, plasma T levels showed positive correlations with HDL-C and inverse correlations with triglycerides, total cholesterol, LDL-C, fibrinogen, and plasminogen activator type 1 (PAI-1; Refs. 33, 51, 123–130). However, T levels have even stronger inverse correlations with BMI; waist circumference; WHR; amount of visceral fat; and serum levels of leptin, insulin, and free fatty acids (FFA). After adjustment for these anthropometric, radiological, or biochemical measures of obesity and insulin resistance, the correlations of the cardiovascular risk factors with T but not with visceral fat or insulin lost their statistical significance (131–133). Likewise, in a case-control study of 50 men who were matched by age and ethnic background but segregated by T levels, hypoandrogenemia was associated with significantly higher BMI, WHR, higher systolic blood pressure, higher fasting and 2-h glucose and insulin levels, and higher levels of total cholesterol, LDL-C, triglycerides, and apolipoprotein (apo)B as well as with lower levels of HDL-C and apoA-I. After adjustment for BMI and WHR, only the negative correlations of T with insulin and triglycerides remained statistically significant (134). These findings indicate that low T in men is a component of a plurimetabolic syndrome, which is characterized by obesity, type 2 diabetes

mellitus, hypertension, hypertriglyceridemia, low HDL-C, and a procoagulatory and antifibrinolytic state.

What comes first, hypotestosteronemia, obesity, or insulin resistance? On the one hand, morbidly obese and insulin-resistant men frequently have low serum levels of T (132, 135) that increase upon weight loss (136, 137). Estradiol levels show the opposite changes to T, with obesity and weight loss. It has therefore been suggested that obesity causes hypotestosteronemia by increased aromatization of T to estradiol in the adipose tissue (Fig. 2). In agreement with an important role of hyperinsulinemia as an etiological factor of hypotestosteronemia in obese men is the negative regulatory effect of insulin on the production of SHBG (138) and the inverse correlation between serum concentrations of insulin and

SHBG (139). Also supporting a role of insulin in the determination of T levels in men, in one study infusion of insulin during euglycemic clamp increased T levels in obese men, but not in lean men (140). On the other hand, hypogonadal men are frequently obese with increased levels of leptin and insulin (140–145). Body weight, leptin levels, and insulin levels decrease upon substitution of T in hypogonadal men (146–148). Treatment of eugonadal obese men with T led to a decrease of visceral fat mass and, in parallel, improved insulin sensitivity and corrected dyslipidemia (149–151). In the opposite experiment, suppression of T by the GnRH antagonist cetrorelix increased serum levels of leptin and insulin (152). These latter data indicate that, in men, the dominant action in the bidirectional relationship between T

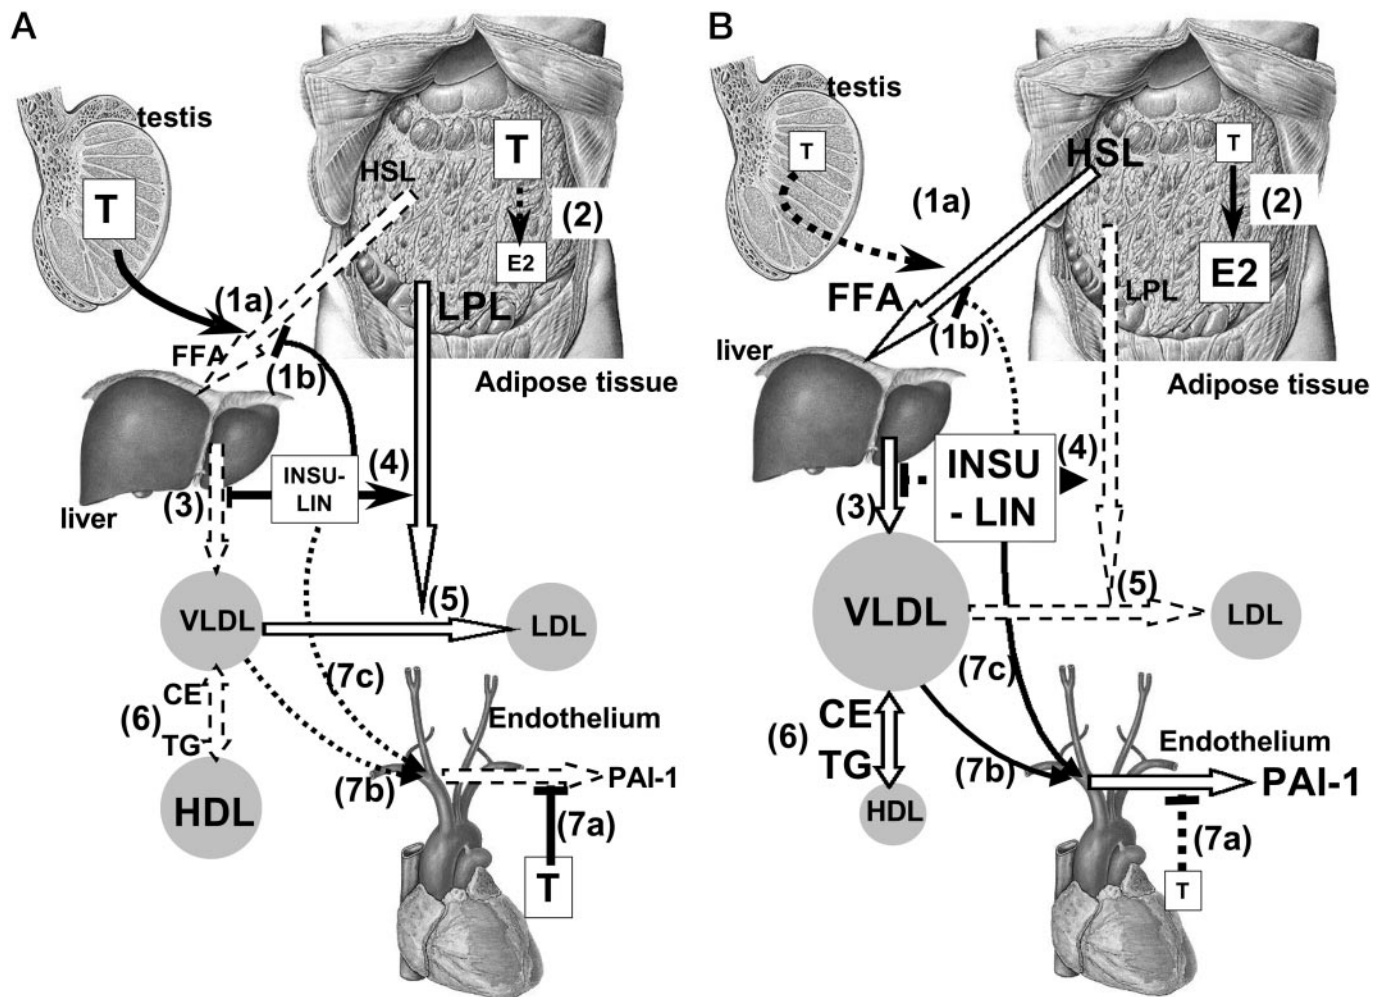

FIG. 2. Model of metabolic effects of T in eugonadal nonobese (A) and hypogonadal obese (B) men. T activates hormone sensitive lipase (HSL) in adipocytes and thereby decreases body fat mass (1a). This implies little aromatization of T into estradiol (2), *i.e.*, facilitates the maintenance of normal T levels in nonobese men (A). Hydrolysis of body fat by HSL produces FFA, which stimulate hepatic very (VLDL) production (3a). However, this hypertriglyceridemic effect is balanced by improved insulin sensitivity in lean individuals with the result of reduced FFA release from adipocytes (1b), inhibited VLDL production (2b), and stimulated secretion of lipoprotein lipase (LPL) by the adipose tissue (3). Normal VLDL production and regular lipolysis of VLDL (and chylomicrons) by LPL (4) lead to normotriglyceridemia and, via low cholesterol ester (CE) transfer protein (CETP)-mediated exchange of CEs and triglycerides between VLDL and HDL (6), to normal HDL-C levels. Taken together, normal T levels, low insulin levels, and normotriglyceridemia help to suppress PAI-1 production in the endothelium (7). In hypogonadal men (B), low T levels impair lipolysis in adipocytes and favor obesity (1a). Enhanced aromatization of T into estradiol in obese men (2) further decreases T levels. Obesity causes insulin resistance with the result of increased FFA release from adipocytes (1b), dis-inhibited VLDL production (3), and decreased LPL secretion (4). Both increased VLDL secretion (3) and decreased lipolysis of triglyceride-rich lipoproteins (5) cause hypertriglyceridemia, which stimulates the CETP-mediated removal of CEs from HDL and thereby causes low HDL-C (6). Finally, hypotestosteronemia (7a), hypertriglyceridemia (7b), and hyperinsulinemia (7c) stimulate the production of PAI-1 in endothelial cells.

and insulin is that T reduces fat mass, especially in the abdomen, and improves insulin action (Fig. 2). Mediated by the androgen receptor in adipocytes, and further up-regulated by T, androgens activate the expression of  $\beta$ -adrenergic receptors, adenylate cyclase, protein kinase A, and hormone-sensitive lipase (153, 154). As a result, T stimulates lipolysis and thereby reduces fat storage in adipocytes (Fig. 2). Androgens elicit an antiadipogenic effect in preadipocytes *in vitro*, whereas estrogens behave as proadipogenic hormones, effects that are related to changes in the expression of the IGF receptor (androgens and estrogens) and peroxisome proliferator-activated receptor  $\gamma$ 2 expression (estrogens; Ref. 155). This may explain the reduction of fat mass after androgen treatment (132).

**2. Observations in women.** Women present the opposite relationships between endogenous androgens and obesity, insulin, and cardiovascular risk factors. In cross-sectional studies, serum levels of T were found to have significant positive correlations with BMI and leptin levels (153, 154, 156, 157). Low serum levels of SHBG, which are an indirect measure of female hyperandrogenism, were associated with high BMI and WHR as well as with high serum levels of leptin and insulin and low serum levels of HDL-C (131, 158). Moreover, in a large prospective study, 20% of women with SHBG levels below the fifth percentile developed type 2 diabetes mellitus during the 12-yr follow-up period (159). Thus, hyperandrogenemia in women, rather than hypoandrogenemia in men, is associated with insulin resistance and diabetes mellitus. In agreement with this, hyperandrogenic women with PCOS frequently present with hypercholesterolemia, low HDL-C, hypertriglyceridemia, elevated fibrinogen and PAI-1, and a family history of diabetes mellitus (160–169). In a retrospective study, Dahlgren *et al.* (164) observed that the adverse cardiovascular risk profile of women with PCOS is also maintained after menopause.

Because many women with PCOS are overweight, and most, if not all, are insulin resistant, it is a matter of debate whether the dyslipidemic and procoagulatory states in women with PCOS are secondary to obesity and insulin resistance (160, 162, 167, 168, 170, 171) or whether hyperandrogenemia itself contributes to obesity, insulin resistance, and hyperinsulinemia (71, 132, 153, 154, 172–179). On the one hand, insulin sensitivity appears to play an important role for the pathogenesis of hyperandrogenemia in PCOS. Insulin stimulates androgen synthesis in the ovaries via its cognate receptor and the inositolglycan pathway (Ref. 180 and Fig. 3). Because the ovaries remain sensitive to insulin when other tissues such as fat and muscle are resistant, hyperinsulinemia can augment the LH- and ACTH-dependent hyperandrogenism in insulin-resistant women with PCOS (Ref. 181 and Fig. 3). In support of this, treatment of insulin resistance in women with PCOS with metformin or the insulin-sensitizer troglitazone significantly decreased serum levels of insulin as well as T, independently of BMI or gonadotropin levels (182–185). Concomitantly, plasma levels of HDL-C increased, and plasma levels of PAI-1 decreased (181–183). In contrast, short-term lowering of ovarian androgens by laparoscopic ovarian cautery did not alter insulin or lipid levels (186).

On the other hand, lowering androgen levels with GnRH agonists (187) and androgen receptor blockade (188) in hyperandrogenic women improved insulin sensitivity and lipid profile (189). The magnitude of these changes, however, is less than that usually encountered in PCOS. Supraphysiological doses of exogenous T administered to genetic females for gender reassignment therapy (153, 154, 190, 191) or to female cynomolgus monkeys (116) increased BMI and the mass of both visceral fat and muscle and decreased insulin sensitivity. Nandrolone treatment in obese postmenopausal women produced a gain in visceral fat and a relatively greater loss of sc fat (192). Methyltestosterone administration (5 mg three times daily for 10–12 d) to young nonobese women with regular menstrual cycles reduced glucose uptake during hyperglycemic and euglycemic clamp studies (193). Experiments in rats and marmoset monkeys showed evidence for androgen imprinting. Transient intrauterine or perinatal exposure to T predisposed female animals to central adiposity and insulin resistance in adult life (194, 195). Thus, there may be a vicious circle in which early androgen excess may contribute to insulin resistance in adult women with PCOS in whom hyperinsulinism aggravates the hyperandrogenism and the associated clinical phenotype (Fig. 3). A further hypothesis linking hyperandrogenism and insulin resistance is the concurrent dysregulation of cytochrome P450c17 $\alpha$  action (leading to excessive androgen synthesis) and insulin receptor function by excessive serine phosphorylation or decreased chironinositol (65, 196, 197). Whatever the likely etiology(s), defective insulin action (independent of obesity) is thought to be the root cause of the metabolic disarray (198, 199) in PCOS.

In summary, the observational studies do not allow any clear conclusions on the role of T in determining cardiovascular risks because the associations between serum levels of T and cardiovascular risk factors are in opposite directions for men and women. These gender-specific correlations are also confounded by the bidirectional relationships between T, adipose tissue, and insulin sensitivity. However, the weight of current experimental evidence would suggest that low endogenous T may be the driving etiological factor for obesity, insulin resistance, and the occurrence of multiple cardiovascular risk factors in men, whereas in women defective insulin action appears to be critical for the development of the hyperandrogenemia associated with polycystic ovaries.

### B. Effects of puberty on cardiovascular risk factors

Longitudinal studies were used to study the effect of puberty and hence endogenous sex hormones on cardiovascular risk factors in children. Prepubertal boys and girls do not differ significantly in their serum lipid and lipoprotein levels. In contrast to girls, in whom levels of HDL-C and LDL-C change little with puberty, sexually maturing boys experience a decrease in HDL-C and increases in LDL-C and triglycerides (200). However, these changes may not reflect effects of sex hormones only because they are confounded by other endocrine changes, for example in the GH/IGF-I axis, which also regulate lipoprotein metabolism.

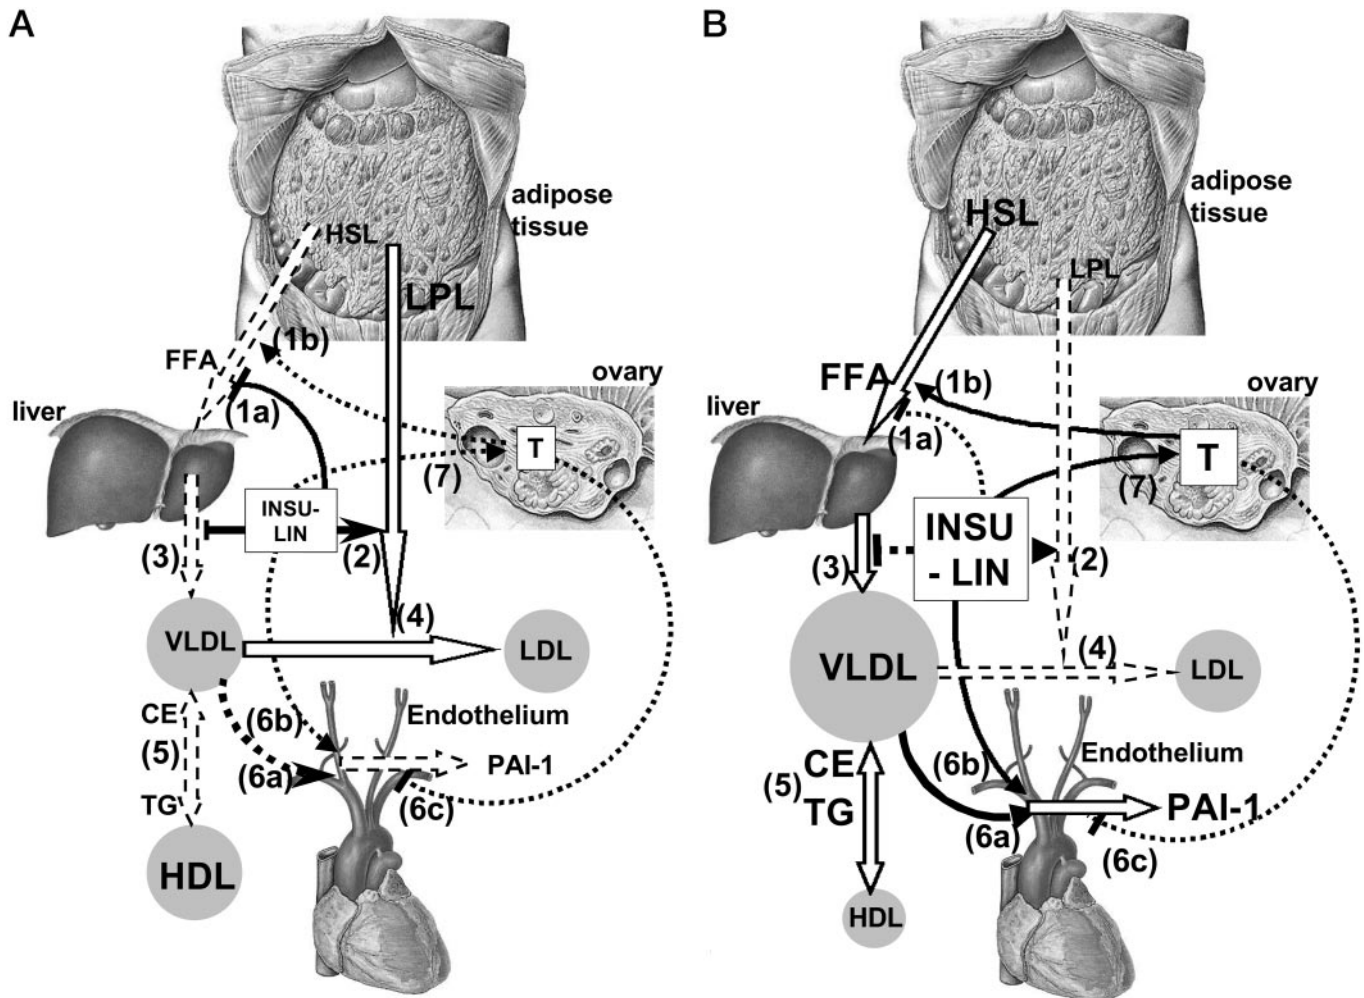

FIG. 3. Model of metabolic effects of T in women. In nonobese women with normal insulin sensitivity (A), adipocytes release limited amounts of FFA (1) and regular amounts of lipoprotein lipase (LPL; 2). VLDLs are secreted at regular amounts by the liver (3) and properly hydrolyzed by LPL (4). Normotriglyceridemia is associated with a low exchange of triglycerides and CE between HDL and VLDL (5) so that HDL-C levels stay normal. Normotriglyceridemia (6a) and low insulin levels (6b) inhibit the release of PAI-1 from endothelial cells. Low insulin levels also limit the ovarian production of T (7). Low T levels support insulin in suppressing FFA release from adipocytes (1b), and thereby hepatic VLDL production, as well as in inhibiting PAI-1 release from endothelial cells (6c). Obese women, by contrast (B), have insulin resistance and hyperinsulinemia. In the adipose tissue, insulin resistance increases the production of FFA (1) and inhibits LPL secretion (2). Enhanced hepatic VLDL secretion (3) and low LPL activity (4) cause hypertriglyceridemia and, indirectly via enhanced CE/triglycerides exchange between VLDL and HDL (5), low HDL-C. Hypertriglyceridemia (6a) and hyperinsulinemia (6b) both stimulate PAI-1 secretion from endothelial cells. Hyperinsulinemia also stimulates the production of T in the ovary (7). Hyperandrogenemia then aggravates the detrimental effects of insulin resistance on FFA release from adipocytes (1b) and thereby on hepatic VLDL production.

### C. Effects of exogenous T on cardiovascular risk factors

In clinical studies, the effects of exogenous T on cardiovascular risk factors differed considerably depending on the dose, route of administration, and duration of treatment, as well as the age, gender, and conditions of the recipients (Table 4). The most consistent findings were decreases in plasma levels of HDL-C, lipoprotein(a) [Lp(a)] and fibrinogen, which are accompanied by much less prominent declines of LDL-C and triglycerides.

1. **HDL-C.** Administration of AASs to either men or women were consistently found to cause substantial reductions of HDL-C (184–188), which, in the extreme, leads to the virtual absence of circulating HDL. Likewise, administration of supraphysiological dosages of T to healthy eugonadal men in

contraceptive studies (201–205), especially when combined with synthetic progestins (206–210), as well as treatment of women with premenstrual syndrome or hormone replacement therapy for postmenopausal women with regimens that contain either T or androgenic steroids, led to a decrease in HDL-C (211–215). Castration or suppression of endogenous T in patients with prostate cancer or treatment with GnRH antagonists in experimental studies was found to increase HDL-C by about 20% (152, 216–223). The effect of GnRH antagonists can be prevented by coadministration of T (224). Taken together, these data indicate that T exerts profound effects on HDL metabolism. These effects are most marked on the large HDL subclass (*i.e.*, HDL<sub>2</sub>), which is devoid of apoA-II (*i.e.*, LpA-I; Refs. 152, 219, and 225–227).

Substitution of T in hypogonadal men or in elderly men

with low to normal T or elevated gonadotropins led to minor or no decrease in HDL-C (Table 4 and Refs. 148, 200, 202–204, 221, 225, 226, and 228–256). In a recent meta-analysis of 19 studies published between 1987 and 1999, Whitsel *et al.* (257) calculated that im administration of an average dosage of  $179 \pm 13$  mg of T ester every  $16 \pm 1$  d for  $6 \pm 1$  months was associated with a decrease of 2–5 mg/dl HDL-C. The older the treated men and the longer the treatment, this decrease of HDL-C appeared to become less prominent. T substitution for up to 3 yr in men over the age of 50 yr did not produce any consistent changes in circulating lipid levels (247, 258). Moreover, an international multicenter male contraception study found a significant decrease in HDL-C in non-Chinese but not in Chinese volunteers (259). Transdermal application of T or dihydrotestosterone also exerted less effect on HDL-C than im application (237, 248–250).

Lowering of HDL-C by T is considered to increase cardiovascular risks because HDL-C exerts several potentially antiatherogenic actions. However, in transgenic animal models, only increases of HDL-C induced by apoA-I overproduction, but not by inhibition of HDL catabolism, were consistently found to prevent atherosclerosis (260). Therefore, the mechanism of HDL modification and, by inference, changes in metabolism of HDL-C rather than changes in levels of HDL-C *per se* appear to determine the (anti-)atherogenicity of HDL (260, 261). Unfortunately, the mechanism and target genes by which T regulates HDL metabolism are not well understood at present. Figure 4 summarizes important steps in HDL metabolism. The production rate of HDL is determined by the hepatic and, to lesser degree, intestinal synthesis of apoA-1, the main protein constituent of HDL (262). The effects of T on apoA-1 production in man are not known. In mice, T increases the synthesis of apoA-1 (263), which at first sight is counter to the HDL-lowering effect of exogenous T. However, in mice, as opposed to man, HDL-C is increased by T and decreased by estradiol (121). At the catabolic site, two genes are likely to be regulated by T, namely hepatic lipase (HL) and scavenger receptor B1 (SR-B1). Regulated by corticotropin and gonadotropins, SR-B1 mediates the selective uptake of HDL lipids into hepatocytes and steroidogenic cells including Sertoli and Leydig cells of the testes as well as cholesterol efflux from peripheral cells including macrophages (260, 264). T up-regulates SR-B1 in the human hepatocyte cell line HepG2 and in macrophages and thereby stimulates selective cholesterol uptake and cholesterol efflux, respectively (264a). HL hydrolyzes phospholipids on the surface of HDL, thereby facilitating the selective uptake of HDL core lipids by SR-B1 (260, 227). The activity of HL in postheparin plasma is increased after administration of exogenous T (225, 226, 229, 238, 265) and slightly decreased by suppression of T after GnRH antagonist treatment (152). However, castration of male rats did not cause significant changes in postheparin plasma activity of HL or in HL mRNA levels in the liver. Subsequent substitution of T raised HL activity without changing HL mRNA expression (266). This raises the possibility that T does not directly regulate the HL gene. In agreement with this, we did not observe any change of HL activity in the supernatants of HepG2 cells that were incubated with T (264a). The increase in both SR-B1 and HL activities is consistent with the HDL-

lowering effect of T. Up-regulation of HL and SR-B1 also explains why T induces the most prominent changes in HDL subclasses HDL<sub>2</sub> and LpA-I, because these particles are preferred substrates of HL and SR-B1 over small HDL<sub>3</sub> and apoA-II-containing HDL. Interestingly, in transgenic mice, overexpression of HL caused a dramatic fall in HDL-C but inhibited rather than enhanced atherosclerosis (260, 264, 227). This again demonstrates the difficulty in extrapolating the HDL-lowering effect of T to increased cardiovascular risk.

2. *Lp(a)*. Lp(a) has striking structural homology to plasminogen but no fibrinolytic activity. Lp(a) resembles LDL because of the presence of one molecule, apoB-100, and by its high content of cholesteryl esters. Lp(a) differs from LDL by the disulfide bridge binding of apoB to a glycoprotein termed apo(a). Lp(a) levels vary considerably in the population between 0 and 300 mg/dl with a frequency distribution that is skewed to lower concentrations. Most of the interindividual variability in Lp(a) levels is determined through variation in the apo(a) gene (267). Of special importance is a size polymorphism. A genetically determined variable number of kringle-IV-repeats within apo(a) is inversely correlated with Lp(a) levels. Results of many case-control studies and most prospective population studies demonstrated that Lp(a) levels higher than 30 mg/dl are an independent risk factor for coronary, cerebrovascular, and peripheral atherosclerotic vessel diseases, especially if the high Lp(a) level coexists with other cardiovascular risk factors (268, 269). Interestingly, in some previous studies, elevated Lp(a) was also found to increase the risk for venous thromboembolic disease, habitual abortion, and preeclampsia, especially if coinciding with other thrombophilic risk factors (270–272).

Lp(a) levels are generally assumed to remain stable throughout life. However, estrogens, progestins, GH, and T<sub>4</sub> can lower Lp(a) levels (273, 274). Likewise, administration of R to orchidectomized patients with prostate cancer (275, 276), as well as administration of supraphysiological doses of T enanthate to healthy men, decreased serum levels of Lp(a) significantly by 25–59% (203, 218, 236, 252, 277). Lp(a) levels were increased by 40–60% in controls and in patients in whom endogenous T was suppressed by treatment with the GnRH antagonist cetrorelix or the GnRH agonist buserelin (219, 275, 276, 278, 279). The Lp(a)-lowering effect of T is independent of estradiol because Lp(a) levels were also lowered when T was administered in combination with an aromatase inhibitor, testolactone (277). Animal studies have also provided evidence for the involvement of T in the regulation of Lp(a) levels. Frazer *et al.* (280) observed that Lp(a) levels decrease in male, but not in female, apo(a)-transgenic mice after sexual maturation. Castration of male animals restored initial Lp(a) levels, which decreased again upon application of dihydrotestosterone. However, it is also important to note that, similar to the changes observed in HDL-C, treatment of hypogonadal men with physiological dosages of T did not cause large changes in Lp(a) levels (Table 4).

It is not known how T regulates Lp(a). Turnover studies have shown that Lp(a) levels are mainly determined by production. The majority of newly synthesized apo(a) is degraded intracellularly before secretion. The larger the apo(a)

TABLE 4. Change in lipids in hypogonadal men receiving T replacement (A) and change in lipids in eugonadal men receiving T treatment (B)

| First author/year (Ref.) | Study design       | Patients                    | Mode of treatment                                                 | Duration  | Δ LDL-C           | Δ HDL-C           | Δ TG | Δ Other risk factors      |
|--------------------------|--------------------|-----------------------------|-------------------------------------------------------------------|-----------|-------------------|-------------------|------|---------------------------|
| A                        |                    |                             |                                                                   |           |                   |                   |      |                           |
| Valdemarsson, 1987 (228) | Open label         | 10 hypogonadal men          | 250 mg TE im/3 or 4 wk                                            | 9 months  | -6%               | 0                 | -14% |                           |
| Kirkland, 1987 (200)     | Open label         | 14 hypogonadal boys         | 100 or 200 mg TE im/month                                         | 3 months  | n.d.              | -14%              | n.d. |                           |
| Sorva, 1988 (229)        | Open label         | 13 hypophysectomized men    | 100 mg TE im/2 wk                                                 | 1 month   | -4%               | -8%               | -11% | apoA-I: -11%              |
| Jones, 1989 (230)        | Open label         | 10 Klinefelter men          | TE implant im                                                     | 4 wk      | +19%              | -11%              | -4%  | apoA-I: +8%               |
| Hromadova, 1989 (251)    | Open label         | 30 sterile men              | 100 mg methyltestosterone/d                                       | 30 d      | ??                | -??%              | +??% |                           |
| Hana, 1991 (234)         | Open label         | 9 hypogonadal men           | 100 mg TI im/wk                                                   | 24 months | 24%*              | +19%              | -30% | apoA-I: -11%              |
| Tenover, 1992 (235)      | Placebo-controlled | 13 hypogonadal elderly men  | 100 mg TE im/wk                                                   | 3 months  | -15%*             | -4%               | -16% | apoA-I: -24%              |
| Bhasin, 1992 (246)       | Open label         | 10 hypogonadal men          | Microcapsulated T im                                              | 12 wk     | -7%               | -16%              | +14% | apoB: -14%                |
| Monley, 1993 (239)       | Open label         | 8 hypogonadal elderly men   | 200 mg TE im/2 wk                                                 | 3 months  | n.d.              | 0                 | n.d. |                           |
| Salehian, 1995 (244)     | Randomized         | 63 hypogonadal men          | 200 mg TE im/3 wk or 2.5 mg T sublingual/d or 5 mg T sublingual/d | 2 months  | n.d.              | 10%               | n.d. |                           |
| Brodsky, 1996 (253)      | Open label         | 5 hypogonadal men           | 3 mg TC per kg body mass im every 2 wk                            | 6 months  | +5%               | -10%              | +3%  |                           |
| Katznelson, 1996 (254)   | Open label         | 29 hypogonadal men          | 100 mg TE or TC im/wk                                             | 6 months  | -6%               | -10%              | -20% |                           |
| Ozata, 1996 (252)        | Open label         | 9 hypogonadal men           | 250 mg TE im/3 wk                                                 | 3 months  | +9%               | +6%               | 0    |                           |
| Zgliczynski, 1996 (240)  | Open label         | 22 hypogonadal men          | 200 mg TE im/2 wk                                                 | 1 yr      | -18% <sup>a</sup> | -9% <sup>b</sup>  | -20% |                           |
| Arslanian, 1997 (255)    | Open label         | 7 boys with delayed puberty | 50 mg TE im/2 wk                                                  | 4 wk      | -14%              | -20% <sup>c</sup> | -9%  |                           |
| Tripathy, 1998 (241)     | Open label         | 10 hypogonadal men          | 200 mg TE im/wk                                                   | 12 wk     | -41%              | +5%               | -25% | apoA-I: -10% <sup>b</sup> |
| Tan, 1998 (225)          | Open label         | 11 hypogonadal men          | 250 mg TE im/4 wk                                                 | 12 wk     | -2%               | -1%               | -12% | Lp(a): -2%                |
| Rabijewski, 1998 (256)   | Open label         | 30 hypogonadal men          | 200 mg TE im/2 wk                                                 | 12 months | -16%              | -4%               | n.d. |                           |

TABLE 4. Continued

| First author/year (Ref.)                                                                | Study design                                         | Patients                                                                                          | Mode of treatment                                                                                              | Duration                              | Δ LDL-C                                         | Δ HDL-C                                                                    | Δ TG                                 | Δ Other risk factors       |
|-----------------------------------------------------------------------------------------|------------------------------------------------------|---------------------------------------------------------------------------------------------------|----------------------------------------------------------------------------------------------------------------|---------------------------------------|-------------------------------------------------|----------------------------------------------------------------------------|--------------------------------------|----------------------------|
| <b>A</b>                                                                                |                                                      |                                                                                                   |                                                                                                                |                                       |                                                 |                                                                            |                                      |                            |
| Jockenhövel, 1999 <sup>d</sup> (232)                                                    | Open label                                           | 12 hypogonadal men<br>13 hypogonadal men<br>15 hypogonadal men<br>15 hypogonadal men              | 100 mg mesterolone po/d<br>or 160 mg TU po/d<br>or 250 mg TE im/3 wk<br>or 1200 mg testosterone sc/d           | 17 wk                                 | -6%<br>+9%<br>+6%<br>-9%                        | -6%<br>-16%<br>-8%<br>-11% <sup>c</sup>                                    | -12%<br>-8%<br>+5%<br>0              | apoA-I: -7%<br>n.s.        |
| Tan, 1999 (226)<br>Wang, 2000 (148)                                                     | Open label<br>Randomized                             | 10 hypogonadal men<br>227 hypogonadal men                                                         | 4 mg transdermal T/d<br>6 mg T/d scrotal patch vs.<br>gel with 50 mg or 100 mg<br>T/d                          | 3 months<br>180 d                     | n.s.                                            | n.s.                                                                       | +3%<br>n.s.                          | apoA-I: -7%                |
| Snyder, 2000 (237)                                                                      | Placebo-<br>controlled<br>double-blind               | 108 hypogonadal<br>elderly men                                                                    | 6 mg transdermal (scrotal)<br>T/d                                                                              | 3 yr                                  | 0                                               | -2%                                                                        | -3%                                  | apoA-I: -3%                |
| Howell, 2001 (248)                                                                      | Placebo-controlled                                   | 35 hypogonadal men                                                                                | 2.5 mg transdermal T/d                                                                                         | 1 yr                                  | -11% <sup>b</sup>                               | 0                                                                          | +26%                                 | apoB: -5%                  |
| Dobs, 2001 (249)<br>Ly, 2001 (250)                                                      | Open label<br>Placebo-<br>controlled                 | 20 hypogonadal men<br>33 hypogonadal men                                                          | 2–2.5 mg transdermal T/d<br>70 mg transdermal DHT/d                                                            | 1 yr<br>3 months                      | -3%<br>-11% <sup>b</sup>                        | -9% <sup>c</sup><br>0                                                      | +16% <sup>b</sup><br>-10%            |                            |
| <b>B</b>                                                                                |                                                      |                                                                                                   |                                                                                                                |                                       |                                                 |                                                                            |                                      |                            |
| Thompson, 1989 (231)<br>Friedl, 1990 (233)                                              | Cross-over<br>Randomized                             | 11 eugonadal men<br>18 eugonadal men                                                              | 200 mg TE im/wk<br>280 mg TE im/wk without<br>or with 250 mg testosterone/<br>d or 20 mg<br>methyltestosterone | 6 wk<br>12 wk                         | -16% <sup>b</sup><br>n.d.                       | -9% <sup>b</sup><br>-4%<br>-16%<br>-33%                                    | +13%<br>+10%<br>+20%<br>+40%         | apoA-I: -12%<br>0<br>-40%  |
| Zmuda, 1993 (238)                                                                       | Cross-over                                           | 14 eugonadal men                                                                                  | 200 mg TE im/wk,<br>250 mg testosterone per day,<br>or both                                                    | 3 wk                                  | +2%<br>-3%<br>-1%                               | -15% <sup>b</sup><br>-4%<br>-20% <sup>b</sup>                              | +17%<br>-13%<br>+3%                  |                            |
| Bagatell, 1994 (202)<br>Meriggola, 1995 (204)<br>Anderson, 1995 (203)<br>Wu, 1996 (259) | Open label<br>Open label<br>Open label<br>Open label | 19 eugonadal men<br>36 eugonadal men<br>63 eugonadal men<br>189 non-Chinese men<br>82 Chinese men | 200 mg TE im/wk<br>200 mg TE im/wk<br>200 mg TE im/wk<br>200 mg TE im/wk<br>200 mg TE im/wk                    | 20 wk<br>1 yr<br>1 yr<br>1 yr<br>1 yr | -6% <sup>b</sup><br>-8%<br>n.s.<br>n.s.<br>n.s. | -15% <sup>b</sup><br>-16%<br>-13% <sup>a</sup><br>-14% <sup>a</sup><br>-2% | +5%<br>n.d.<br>n.s.<br>+10%<br>(all) | apoA-I: -8%                |
| Marcovina, 1996 (236)<br>Grinspoon, 2000 (242)                                          | Open label<br>Placebo-<br>controlled                 | 19 eugonadal men<br>54 men with AIDS                                                              | 200 mg TE im/wk<br>200 mg TE im/wk                                                                             | 20 wk<br>12 wk                        | -8%<br>-6%                                      | -14% <sup>b</sup><br>-8% <sup>b</sup>                                      | +13%<br>+25%                         | Lp(a): -22% <sup>c</sup>   |
| Bhasin, 2001 (243)                                                                      | Randomized                                           | 61 eugonadal men<br>with suppressed T                                                             | 25, 50, 125, 300, or 600 mg TE<br>im/wk                                                                        | 20 wk                                 | n.d.                                            | Dose-<br>dependent<br>+ 10–20% <sup>a</sup>                                | n.d.                                 |                            |
| Uyanik, 1997 (245)                                                                      | Placebo-<br>controlled                               | 37 eugonadal men                                                                                  | 120 mg TU po per day                                                                                           | 2 months                              | -25% <sup>c</sup>                               | +3%                                                                        | -4%                                  | apoA-I: -15%<br>apoB: +12% |

Δ LDL-C, Change in plasma LDL-C from pretreatment baseline; Δ HDL-C, change in plasma HDL-C from pretreatment baseline; Δ TG, change in plasma triglycerides from pretreatment baseline; TE, T enanthate; TU, T undecanoate; DHT, dihydrotestosterone; Tl, T isobutyrate; n.d., not done.

<sup>a</sup> P < 0.001.

<sup>b</sup> P < 0.05.

<sup>c</sup> P < 0.01.

<sup>d</sup> Changes were compared to follow-up; baseline (screening) results are implausibly extreme and different from follow-up.

isoforms, the more they are degraded intracellularly and, hence, the less is secreted. Interestingly, estradiol decreases Lp(a) production, but it is not known whether estradiol regulates the transcription of the apo(a) gene or the posttranslational processing of apo(a) (267, 281).

It is also not known whether changes in Lp(a) induced by T will affect cardiovascular risk. Interestingly, however, in the Heart and Estrogen/Progestin Replacement Study (HERS; Ref. 282), postmenopausal hormone replacement therapy prevented coronary events only in those women who had elevated Lp(a) at baseline and experienced a decrease of Lp(a) levels by treatment with conjugated equine estradiol and medroxyprogesterone.

**3. The hemostatic system.** In agreement with an important role of thrombus formation in the pathogenesis of acute coronary events and stroke, prospective studies have identified various hemostatic variables as cardiovascular risk factors (283). The risk of MI increases with plasma levels of the thrombogenic factors fibrinogen and factor VII, as well as with plasma levels of the fibrinolysis inhibitor PAI-1 or tissue plasmino-

gen activator antigen, which represents the inactivated form (283). Platelet aggregability is another important factor that determines thrombogenicity and, thereby, cardiovascular risk. T was shown to regulate plasma levels of fibrinogen and PAI-1. Administration of supraphysiological dosages of T to 32 healthy men participating in a trial of male contraception led to a sustained decrease of fibrinogen by 15–20% over 52 wk of treatment (284). In this study the doubling of T levels initially also led to significant decreases of PAI-1, protein S, and protein C, as well as to increases of antithrombin III and  $\beta$ -thromboglobulin. Likewise, PAI-1 was decreased in men who received the anabolic androgen stanozolol (285). Suppression of T in patients with prostate cancer or benign prostate hypertrophy, however, by treatment with the nonsteroidal antiandrogen casodex or the GnRH agonist leuprolide exerted no significant effects on plasma fibrinogen levels (220, 221). In women, treatment of endometriosis with the weak androgen danazolol, as well as postmenopausal hormone replacement therapy with tibolone, led to significant decreases of fibrinogen and PAI-1 levels (286–288). In

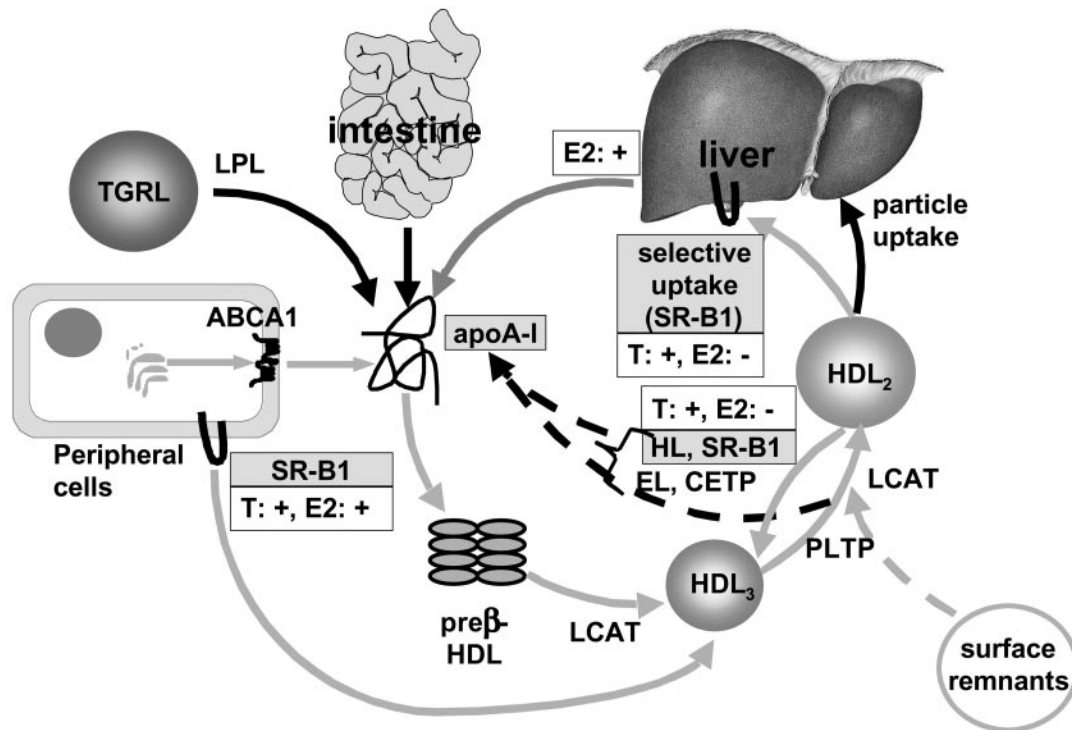

**FIG. 4.** Pathways of HDL metabolism and regulation by T and estradiol (E2). Mature HDL<sub>3</sub> and HDL<sub>2</sub> are generated from lipid-free apoA-I or lipid-poor pre $\beta$ <sub>1</sub>-HDL as the precursors. These precursors are produced as nascent HDL by the liver or intestine or are released from lipolyzed VLDL and chylomicrons, or by interconversion of HDL<sub>3</sub> and HDL<sub>2</sub>. ATP-binding cassette 1 (ABCA1)-mediated lipid efflux from cells is important for initial lipidation; lecithin cholesterol acyl transferase (LCAT)-mediated esterification of cholesterol generates spherical particles, which continue to grow upon ongoing cholesterol esterification, and phospholipid transfer protein (PLTP)-mediated particle fusion and surface remnant transfer. These mature HDL particles also continue to accept cellular cholesterol by processes that are facilitated by SR-B1 and LCAT. Larger HDL<sub>2</sub> are converted into smaller HDL<sub>3</sub> upon CETP-mediated export of CEs from HDL onto apoB-containing lipoproteins, SR-B1-mediated selective uptake of CEs into liver and steroidogenic organs, and HL-mediated hydrolysis of phospholipids. HDL lipids are catabolized either separately from HDL proteins, *i.e.*, by selective uptake or via CETP-transfer, or together with HDL proteins, *i.e.*, via uptake through as-yet unknown HDL receptors or apoE receptors. Both the conversion of HDL<sub>2</sub> into HDL<sub>3</sub> and the PLTP-mediated conversion of HDL<sub>3</sub> into HDL<sub>2</sub> liberate lipid-free or poorly lipidated apoA-I, which is either reused for the formation of mature HDL or is filtrated into the kidney. *Gray arrows* represent lipid transfer processes, and *black arrows* represent protein transfer processes. The hepatic expression and activity of both HL and SR-B1 was shown to be up-regulated by T and down-regulated by estradiol. In addition estradiol up-regulates the hepatic expression and secretion of apoA-I. These actions of T and estradiol are in good agreement with their lowering and increasing effect on HDL-C, respectively. In addition, both T and estradiol stimulate SR-B1 expression in macrophages and thereby cholesterol efflux from these cells onto lipidated HDL. [Modified from Refs. 260 and 261.]



agreement with the lowering effects of T on PAI-1, T inhibited the secretion of PAI-1 from bovine aortic ECs *in vitro* (289). Taken together, the current data indicate that T lowers fibrinogen and PAI-1. However, these anticoagulatory and profibrinolytic effects may be opposed by proaggregatory effects on platelets because high dosages of androgens were found to decrease cyclooxygenase activity and thereby increase platelet aggregability (288, 290).

In conclusion, exogenous T exerts significant dose-dependent effects on several risk factors, some of which at first sight appear beneficial, namely lowering of Lp(a), insulin, fibrinogen, and PAI-1, whereas lowering of HDL-C is considered adverse. The metabolic effects of T are very prominent if supraphysiological dosages or synthetic androgens are used but appear to be rather subtle in the setting of hormone replacement of hypogonadal men. It is also important to emphasize that the mechanism by which T reduces circulating HDL-C may actually confer protection from, rather than promotion of, atherosclerosis. Given that several moderately expressed risk factors interact with one another in a nonlinear fashion, it is difficult to predict the net effect of exogenous T on an individual's cardiovascular risk, even by the use of algorithms or scoring systems that take into consideration multiple risk factors simultaneously (291, 292).

## VII. Effects of T on Cells of the Arterial Wall and Vascular Function

Atherosclerosis is a chronic process developing over decades. It is initiated by an injury to the endothelium via physical (shear) stress and exposure to atherogenic lipids and toxins, such as those contained in tobacco smoke, or infectious agents (293–295). The dysfunctional endothelium is impaired in its abilities to serve as a barrier against atherogenic lipoproteins, to regulate vascular tone by the production of nitric oxide (NO) and other vasoactive molecules, and to prevent thrombosis. Activated ECs also express selectins, adhesion molecules, and integrins to which circulating monocytes and T lymphocytes bind before they transmigrate into the subendothelial space. There, the monocytes differentiate to macrophages and ingest lipoproteins that have permeated the endothelium and become modified within the arterial wall, by oxidation, for example. The uptake of modified lipoproteins (oxidized LDL in particular) by macrophages leads to the formation of large foam cells. These, together with T lymphocytes, release inflammatory mediators that stimulate the proliferation and migration of SMCs. All three cell types together form the so-called fatty streak. All stages of lesion formation up to fatty streak development are probably reversible, especially with lipid-lowering drugs. If the fatty streak does not regress, however, it progresses to the incompletely reversible fibrofatty lesion and, ultimately, to the fibrous or cell-rich full-blown atherosclerotic plaque. In this complicated lesion, activated macrophages, macrophage-derived foam cells, T lymphocytes, and mast cells surround a necrotic and sometimes partially calcified lipid-rich core. These lesions can narrow the lumen of the coronary artery and thereby interfere with myocardial perfusion. Clinically, these lesions will cause stable angina

pectoris. Some of these plaques have a very thin fibrous cap and can rupture and expose tissue factor, collagen, and lipids to the circulating blood. This local procoagulant surface will induce platelet aggregation and intravascular coagulation. The thrombi thus formed may become incorporated into the plaque, or may disseminate to occlude the vessel, resulting in infarction of the downstream myocardium (293–295).

Stimulated by the gender difference in risk for premature atherosclerosis, research on effects of sex hormones on vascular function and vascular cell biology has only started recently. Efforts so far however have focused predominantly on estrogens on the premise that they are cardioprotective. (11, 296, 297).

### A. Vascular expression of sex hormone receptors and T converting enzymes

A direct genomic effect of T on vascular function requires the expression of the androgen receptor in vascular cells. Receptor binding assays, *in situ* hybridization, RT-PCR, and immunohistochemical studies have demonstrated androgen receptor gene expression in the arterial wall of rabbits, dogs, monkeys, and men (298, 299), as well as in cultivated vascular SMCs, ECs, macrophages, megakaryocytes, and platelets (Fig. 5 and Refs. 14 and 300–302). Interestingly, human monocyte-derived macrophages were found to express the androgen receptor in a gender-specific manner. Macrophages of male donors exhibit a 4-fold higher expression of the androgen receptor than macrophages of female donors (14). In isolated rings of de-endothelialized rabbit aorta, T was found to stimulate the expression of the androgen receptor and to inhibit neointimal plaque formation, indicating autoregulatory effects of T (299).

T may also exert vascular effects indirectly, *i.e.*, after conversion to estradiol. In agreement with this concept, vascular ECs and SMCs as well as macrophages and platelets were found to express aromatase and 17 $\beta$ -hydroxysteroid dehydrogenase (303–305), so that estradiol can be produced locally within the arterial wall from circulating precursors. Indeed, labeling experiments confirmed that vascular ECs and SMCs can synthesize estradiol from both T and DHEA (303, 304, 306). ER $\alpha$ , ER $\beta$ , as well as a membrane ER are expressed in EC, SMC, macrophages, and platelets as well as coronary arteries of monkey and man (307–317). The extraglandular and intravascular production of estrogens (from local aromatization of circulating androgens) may therefore play a role in male cardiovascular physiology and pathophysiology (see Section IX).

There is increasing evidence that steroid hormones including T are also ligands of plasma membrane steroid receptors and can modulate cell membrane channels, *e.g.*, ATP-sensitive, voltage-dependent, and calcium-activated potassium channels (318, 319, 320). In particular, the effects of supraphysiological doses of T on vasoreactivity have been assigned to nongenomic modes of actions. Finally, T was shown to regulate macrophage function by nongenomic effects via a G protein-coupled, agonist-sequesterable plasma membrane receptor that initiates calcium- and 1,4,5-trisphosphate-signaling pathways (321, 322).

In summary, vascular cells contain steroid hormone re-

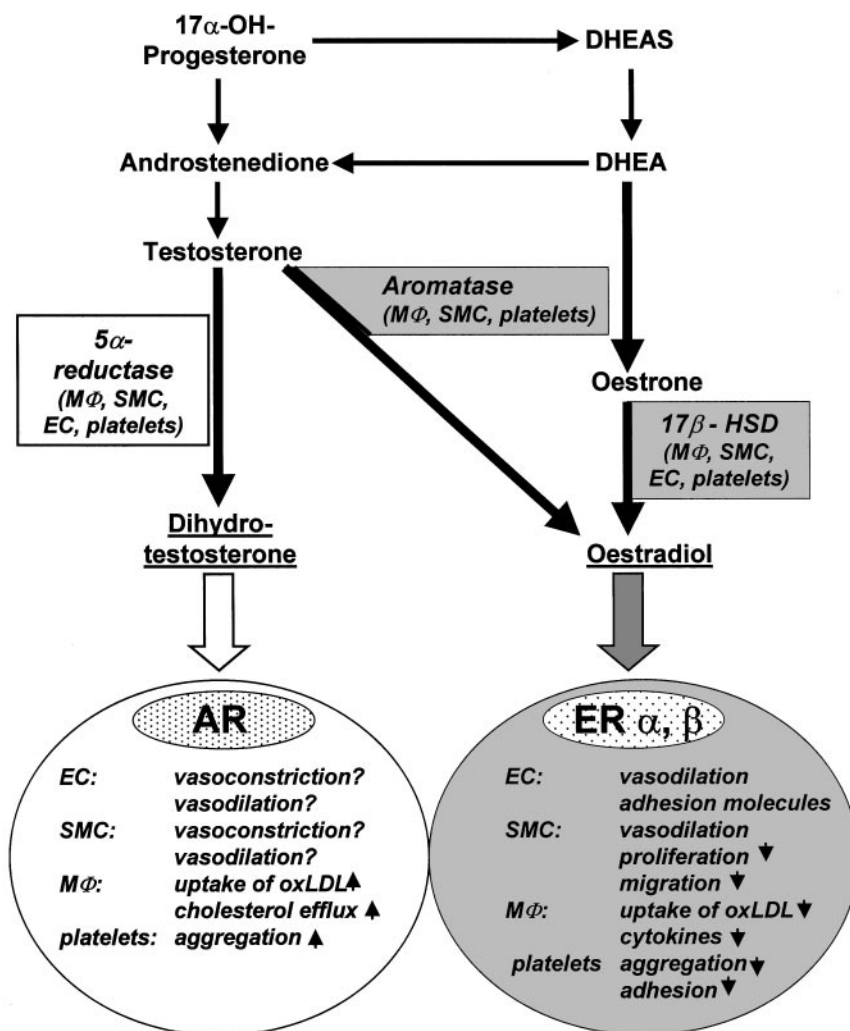

FIG. 5. Metabolism and modes of action of sex steroids in vascular cells. In various cells of the vascular wall, T can exert direct effects either by activation of the androgen receptor (AR) or by nongenomic effects on plasma membrane receptors and channels. However, the expression of aromatase and 17 $\beta$ -hydroxysteroid dehydrogenase in SMCs, ECs, and macrophages (M $\Phi$ ) opens the possibility of local conversion of T (and DHEA) into estradiol. Both the classic ER $\alpha$  and the alternative ER $\beta$  are expressed by various vascular cells, so that T can also modulate vascular physiology indirectly via local estradiol production.

ceptors and converting enzymes needed for the genomic effects of T and estradiol as well as for the local production of estradiol. T can therefore regulate vascular physiology and contribute to the pathogenesis of atherosclerosis both directly and indirectly via estradiol. Furthermore, the vascular effects of supraphysiological doses of T appear to be mediated independently of nuclear sex hormone receptors.

### B. Effects of T on vascular reactivity

An early hallmark of atherosclerosis is decreased vascular responsiveness to various hormonal stimuli either due to endothelial dysfunction or due to endothelium-independent disturbances in vascular SMC physiology. As a result, decreased vasodilation and enhanced vasoconstriction can lead to vasospasm and angina pectoris. Moreover, endothelial dysfunction also contributes to coronary events by promoting plaque rupture and thrombosis (323–326). In contrast to the many clinical studies and experimental studies documenting the protective effects of estrogens on vascular function (for reviews, see Refs. 11, 274, 295, 314, and 327–331), relatively little and contradictory data are available on the effects of T on vascular reactivity. T can induce vasodilation or vasoconstriction via endothelium-dependent or endothelium-independent mechanisms and by genomic or non-genomic modes of action (Table 5). The diversity of these findings appears to be due to differences in species, gender, concomitant disease, and, most importantly, dosage of T.

In two case-control studies (Table 5), male-to-female transsexuals receiving high-dose estrogens had greater endothelium-dependent vasodilation than male controls (332, 333). However, these studies may have monitored the effects of estradiol application rather than of T removal. Indicative of an adverse effect of T, nitrate-induced and, hence, endothelium-independent dilation of the brachial arteries was significantly reduced in female-to-male transsexuals taking high-dose androgens (334). Moreover, in another case-control study, patients with prostate cancer, who were deprived of endogenous androgens either surgically or pharmacologically, had a greater flow-induced (*i.e.*, endothelium-dependent) dilation of brachial arteries than controls, who were healthy men or men with nonprostate cancers. The endothelium-independent vasodilation by nitroglycerin did not differ between the groups (335). In a group of 110 healthy men, we have observed a positive association between the number of CAG repeats in exon 1 of the androgen receptor gene and endothelium-dependent as well as endothelial-

lium-independent mechanisms and by genomic or non-genomic modes of action (Table 5). The diversity of these findings appears to be due to differences in species, gender, concomitant disease, and, most importantly, dosage of T. In two case-control studies (Table 5), male-to-female transsexuals receiving high-dose estrogens had greater endothelium-dependent vasodilation than male controls (332, 333). However, these studies may have monitored the effects of estradiol application rather than of T removal. Indicative of an adverse effect of T, nitrate-induced and, hence, endothelium-independent dilation of the brachial arteries was significantly reduced in female-to-male transsexuals taking high-dose androgens (334). Moreover, in another case-control study, patients with prostate cancer, who were deprived of endogenous androgens either surgically or pharmacologically, had a greater flow-induced (*i.e.*, endothelium-dependent) dilation of brachial arteries than controls, who were healthy men or men with nonprostate cancers. The endothelium-independent vasodilation by nitroglycerin did not differ between the groups (335). In a group of 110 healthy men, we have observed a positive association between the number of CAG repeats in exon 1 of the androgen receptor gene and endothelium-dependent as well as endothelial-

TABLE 5. Effects of testosterone on vasoreactivity

| First author, year (Ref.)         | Species                    | Artery   | Study type     | Dose <sup>a</sup> | Effect   | Role of endothelium     | Vasodilation |
|-----------------------------------|----------------------------|----------|----------------|-------------------|----------|-------------------------|--------------|
| McCrohon, 1997 (332)              | Human (M-to-F transsexual) | Brachial | Case-control   | 0                 | ?        | Dependent               | Increased    |
| Herman, 1997 (335)                | Human (M castrated)        | Brachial | Case-control   | 0                 | ?        | Dependent               | Increased    |
| New, 1997 (333)                   | Human (F-to-M transsexual) | Brachial | Case-control   | nmol              | ?        | Dependent & independent | Decreased    |
| McCredie, 1998 (334)              | Human (F-to-M transsexual) | Brachial | Case-control   | nmol              | ?        | Dependent & independent | Decreased    |
| Webb, 1999 (103)                  | Human (M)                  | Coronary | Intervention   | nmol              | Direct   | Independent             | Increased    |
| Rosano, 1999 (104)                | Human (M)                  | Coronary | Intervention   | μmol              | Direct   | ?                       | Increased    |
| Ong, 2000 (337)                   | Human (M)                  | Brachial | Intervention   | nmol              | Direct   | Dependent               | No effect    |
| Zitzmann, 2001 (336) <sup>b</sup> | Human (M)                  | Brachial | Association    | μmol              | ?        | Dependent & independent | Increased    |
| Warboys, 2001 (338)               | Human (F)                  | Brachial | Intervention   | Endo              | Direct   | Dependent & independent | Decreased    |
| Adams, 1995 (116)                 | Monkey (F)                 | Coronary | <i>In vivo</i> | nmol              | Direct   | Dependent               | Increased    |
| Chou, 1996 (339)                  | Dog (M & F)                | Coronary | <i>In vivo</i> | μmol              | Direct   | Dependent               | Increased    |
| Farhat, 1995 (341)                | Pig (M & F)                | Coronary | <i>Ex vivo</i> | μmol              | Direct   | Dependent & independent | Increased    |
| Quan, 1999 (344)                  | Pig (M & F)                | Coronary | <i>Ex vivo</i> | μmol              | Direct   | Independent             | Increased    |
| Teoh, 2000 (343)                  | Rabbit (M & F)             | Coronary | <i>Ex vivo</i> | nmol              | Indirect | Dependent & independent | Decreased    |
| Yue, 1995 (342)                   | Rabbit (M & F)             | Coronary | <i>Ex vivo</i> | μmol              | Direct   | Dependent & independent | Increased    |
| Ceballos, 1999 (345)              | Rat                        | Coronary | <i>Ex vivo</i> | nmol              | Indirect | Dependent               | Decreased    |
| Costarella, 1996 (340)            | Rat (M)                    | Aorta    | <i>Ex vivo</i> | μmol              | Direct   | Dependent & independent | Increased    |
| Hutchison, 1997 (346)             | Rabbit                     | Aorta    | <i>Ex vivo</i> | nmol              | Indirect | Dependent               | Decreased    |
| Geary, 2000 (347)                 | Rat (M)                    | Cerebral | <i>Ex vivo</i> | μmol              | Direct   | Dependent               | Increased    |

M, Male; F, female.

<sup>a</sup> Change in serum levels: 0, castration; endo, endogenous T level; nmol, nanomolar; μmol, micromolar.

<sup>b</sup> Association with CAG repeat polymorphism in the androgen receptor, *i.e.*, T sensitivity.

independent vasodilatation. Thus, the greater the sensitivity to T, the less brachial arteries dilate in response to either flow or nitrate (336).

In contrast to these case-control or cross-sectional studies, acute interventional studies with iv administration of T to male patients with CAD revealed apparently beneficial vasodilatory effects of T (Refs. 103, 104, and 337 and Table 5; also see Section IV.C). However, the extremely high doses employed question the specificity and physiological relevance of these findings. In postmenopausal women, T plus estradiol improved endothelial-dependent (flow-mediated) and nonendothelial-dependent (GTN) brachial artery vasodilatation for 6 wk in an uncontrolled study (338).

*In vivo* studies in monkeys and dogs of both sexes as well as most *in vitro* studies with animal vessels suggest that T exerts beneficial effects on vascular reactivity. After T treatment for 2 yr in ovariectomized female cynomolgus monkeys, intracoronary injections of acetylcholine caused significant endothelium-dependent vasodilation in treated but not in untreated animals. In contrast, endothelium-independent vasodilation in response to nitroglycerin occurred normally in both groups (116). In dogs, T induced vasodilation of coronary arteries by endothelium-dependent and -independent mechanisms (339). *In vitro* studies with isolated rings of coronary arteries and/or aortas from rats, rabbits, and pigs also found that, in both sexes, T improved both endothelium-dependent and/or endothelium-independent vascular responsiveness (340–342). Again, it must be emphasized that all these studies employed supraphysiological to pharma-

logical doses of T in the micromolar range. Teoh *et al.* (343) observed a direct vasodilatory effect of T on porcine coronary artery rings at micromolar concentrations but no direct effect at nanomolar dosages. In contrast, a physiological dose of T inhibited the vasodilatory effects of bradykinin and calcium ionophores (343, 344). Similarly, T inhibited the adenosine-mediated vasodilation of rat coronary arteries (345) and impaired endothelium-dependent relaxation of aortic rings from rabbits that were either made hypercholesterolemic or exposed to tobacco smoke (346).

The cellular and molecular mechanisms by which T regulates vascular tone are not well understood. Evidence for and against endothelium-dependent or endothelium-independent mechanisms has been found (Table 5). Results of some studies suggest the involvement of endothelial NO (116, 318, 339–341, 347). In dog coronary arteries, rat aorta, and rat cerebral arteries, the NO synthase inhibitor *N*<sup>G</sup>-monomethyl-L-arginine prevented T-induced vasodilation (339, 340, 347). However, in another *in vitro* study, *N*<sup>G</sup>-monomethyl-L-arginine had no effect on T-induced vasodilation of rabbit aortas and coronary arteries (342). In agreement with the latter, *in vitro* expression of NO synthase in human aortic ECs was stimulated by estradiol but not by T (348). The involvement of prostaglandins is suggested by the observation that T increases the response of coronary arteries to prostaglandin F<sub>2α</sub> (341, 349) and by the finding that dihydrotestosterone increases the density of thromboxane receptors in smooth muscle cells of rats and guinea pigs (350). However, in some *in vivo* and *in vitro* animal studies, pre-

treatment with the prostaglandin synthesis inhibitor indomethacin had no effect on T-induced vasodilation, so that the role of eicosanoids in mediating the actions of T on the arterial wall is still controversial (318, 339, 342, 343).

It is also unclear whether T regulates vasoreactivity by genomic or nongenomic effects or both. The association of endothelium-dependent and -independent vasoreactivity with the CAG repeat polymorphism in the androgen receptor provides some indirect evidence for the importance of genomic T effects on vascular ECs and SMCs (336). Moreover, T may exert its effects on vasoactivity after conversion into estradiol and activation of the ERs. However, neither the aromatase inhibitor aminoglutethimide nor the ER antagonist ICI 182,780 prevented the T-induced vasodilation (339, 342). In view of several short-term clinical studies that found vasodilatory effects of estradiol in postmenopausal women (314), this observation is surprising at first sight. However, it is in agreement with several long-term studies that did not verify the vasodilatory effect of estradiol (351–353). Two observations also indicate that T, especially in supraphysiological doses, modulates vascular tone via nongenomic modes of action. First, the androgen receptor antagonists, flutamide or cyproterone acetate, did not inhibit the effects of T on rabbit or pig coronary arteries (342, 343). Second, barium chloride attenuated the T-induced vasorelaxation of rabbit aortas and coronary arteries, indicating that T modulates the opening of potassium channels in vascular SMCs (342).

In summary, T modulates vasoreactivity by both endothelium-dependent and -independent mechanisms as well as by genomic and nongenomic modes of action. Physiological concentrations of T appear to restrict vasodilatation by activation of the androgen receptor. In contrast, supraphysiological or pharmacological doses of T seem to potentiate arterial vasodilatation through nongenomic actions.

### C. Effects of T on macrophage functions

Increased uptake of oxidatively modified lipoproteins via type A scavenger receptors leads to the intracellular accumulation of cholesteryl esters in macrophages and thereby to foam cell formation (293, 354–356). Estradiol inhibits oxidation of LDL both in the presence and absence of cells including macrophages (297). In contrast, T increases the oxidation of LDL by placental macrophages *in vitro* (357). Moreover, dihydrotestosterone dose-dependently stimulates the uptake of acetylated LDL by scavenger receptor type A and intracellular cholesteryl ester accumulation in macrophages (14). In addition to the higher expression of the androgen receptor in male donors, this effect was only seen in macrophages of male but not female donors. The stimulatory effect of dihydrotestosterone was blocked by the androgen receptor antagonist hydroxyflutamide (14).

After internalization, oxidized LDL is transported via endosomes to lysosomes for degradation. Cholesteryl esters are hydrolyzed by lysosomal acid lipase. The liberated cholesterol leaves the lysosome membrane to be re-esterified by the microsomal enzyme lecithin:cholesterol acyltransferase to form cholesteryl esters that can be stored in the cytosol, giving the foamy appearance of lipid-laden macrophages

(356). The transport of cholesterol from lysosomes to the site of re-esterification is inhibited *in vitro* by various steroids with an oxo-group at the C17 or C20 position such as progesterone, pregnenolone, and androstenedione. 17-Hydroxysteroids including T were less effective (358). Cytosolic cholesteryl esters can be hydrolyzed by neutral cholesterol esterase (NCEH), which is activated by cAMP. In adipose tissue of female rats, NCEH is more active than in adipose tissue of male rats. Moreover, exogenous estradiol increases NCEH activity in male rats and in female rats that have been ovariectomized. *In vitro*, estradiol but not T increased the activity of NCEH in the murine macrophage cell line J774, probably by increasing the activity of a cAMP-dependent protein kinase A (297, 359).

Nonhepatic and nonsteroidogenic cells such as macrophages cannot metabolize cholesterol and, therefore, can only dispose of excess cholesterol by secretion. Hence, cholesterol efflux from cells is central to the regulation of the cellular cholesterol homeostasis. Nonspecific and passive (*i.e.*, aqueous diffusion) as well as specific and active processes (*i.e.*, receptor-mediated) are involved. To date, two plasma membrane proteins are known to facilitate cholesterol efflux (Fig. 4). Interaction of the SR-B1 with mature lipid-containing HDL is thought to facilitate cholesterol efflux by reorganizing the distribution of cholesterol within bilayer plasma membrane. The ATP binding cassette transporter A1 mediates phospholipid and cholesterol efflux to extracellular lipid-free apolipoproteins by translocating these lipids from intracellular compartments to the plasma membrane and/or by forming a pore within the plasma membrane, through which the lipids are secreted (260). We have found that T up-regulates the expression of the SR-B1 in human monocyte-derived macrophages, thereby stimulating HDL-induced cholesterol efflux. No effect of T was seen on the expression of the ATP binding cassette transporter A1 (264a). Interestingly, macrophage SR-B1 has also been shown to be stimulated by estradiol (360). However, the stimulatory effect of T on cholesterol efflux from macrophages was inhibited by flutamide so that T appears to regulate SR-B1 directly rather than indirectly via estradiol.

Activated macrophages produce various cytokines including chemotactic protein 1, IL-1 $\beta$  and IL-10, and TNF $\alpha$ , as well as growth factors such as platelet-derived growth factor 1. These bioactive molecules induce or inhibit various processes that contribute to atherosclerosis, *e.g.*, recruitment of macrophages into the vascular wall and SMC proliferation and migration (293, 294, 326). Effects of T on the production of cytokines and growth factors have not been studied in foam cell macrophage models but only in unstimulated or lipopolysaccharide-stimulated macrophages. Whether these results are also valid for macrophages in the arterial wall is not known. For example, estradiol but not T inhibited the migration of monocytes in response to chemotactic protein 1. IL-1 $\beta$  production in rat testicular macrophages and hamster peritoneal macrophages was also independent of T (297, 361, 362). In J774 macrophages, T exerted potentially antiinflammatory effects by stimulating IL-10 synthesis and inhibiting the production of TNF $\alpha$  and NO (363).

In summary, T appears to modulate lipid transport mechanisms of macrophages that favor both lipid accumulation

(uptake of modified LDL via scavenger receptor type A) and lipid secretion (cholesterol efflux via SR-B1). These regulatory effects are at least partially exerted via the androgen receptor.

#### D. Effects of T on arterial smooth muscle functions

In addition to regulating vascular tone (see *Section VII.B* for details), arterial SMCs play an important role in atherosclerosis by proliferation, migration, and matrix production (293, 326, 364). These processes have both negative and positive implications for the clinical course of atherosclerosis by causing stenoses and stabilizing plaques, respectively. In contrast to estradiol, T was found not to affect proliferation and migration of SMCs (365, 366). Moreover, the protection of female rabbits by estradiol, but not male rabbits by T, from atherosclerosis was associated with decreased incorporation of 5'-bromo-2'-deoxyuridine into DNA of neointimal cells, an *in vivo* marker of arterial SMC proliferation (118). Finally, the effect of T to attenuate early atherosclerosis of LDL-receptor-deficient mice is prevented by inhibition of aromatase, indicating that locally produced estradiol rather than T is important for the modulation of plaque growth and stabilization (122a).

#### E. Effects of T on platelet functions

Aggregation of platelets is a prerequisite for thrombus formation and, hence, a critical step in acute coronary events. Administration of T cypionate to eugonadal men led to enhanced *ex vivo* platelet aggregation in response to the thromboxane analog I-BOP but not in response to thrombin (367). T increases the expression of the androgen receptor in a megakaryocyte cell line, as well as in platelets (368, 369). The androgen receptor antagonist flutamide inhibited the stimulatory effect of T on thromboxane receptor expression (368, 369), suggesting that the effect is mediated via the androgen receptor.

### VIII. DHEA(S) and CAD in Men and Women

DHEA and its sulfate DHEAS are weak but highly abundant adrenal androgens that show a progressive age-related decline in both men and women from the third decade onward (370, 371). There is a growing body of opinion suggesting that DHEA supplementation may be beneficial to the elderly in a variety of physiological functions including the prevention of cardiovascular disease (355–375). It is implied that, against an androgenic milieu in men, DHEA acts as a prohormone for metabolites with predominantly estrogenic effects and antiatherogenic actions (373). The concept that DHEA protects against atherosclerosis was first put forward by Kask in 1959 (376).

Many clinical studies in men have attempted to demonstrate a correlation between serum DHEAS levels with different CAD endpoints, including the extent of atherosclerosis assessed by autopsy, coronary angiography, carotid vessel thickness/pulse wave, aortic calcification, and clinical disease states including angina, MI, and mortality (Table 6). These studies have shown either an inverse (Refs. 47, 53, 55,

61, and 377–383, which are mostly cross-sectional), null (33, 48, 50, 57, 60, 379, 383–388), or positive (38, 52, 389) relationship between DHEAS levels and CAD (Table 6). Interpretation of these observational studies is hampered by the same methodological shortcomings that have been outlined for T (see *Section III*).

In men, all but three of the nested case-control or prospective cohort studies showed no association between DHEAS levels and incident CAD (Table 6A). In the Helsinki Heart Study of middle-aged dyslipidemic men, higher DHEAS levels were associated with an increased risk of CAD (52). In the Honolulu Heart Study of 6000 men of Japanese descent followed for 18 yr (379), low DHEA was associated with fatal but not nonfatal CAD. In the Rancho Bernardo cohort study, a preliminary report of 242 men also showed a negative relationship between DHEAS and CAD mortality (377). However, in the full analysis of the same study on 942 men over 19 yr (382), there was only a modest negative relationship between DHEAS and those that survived their cardiac events but none with CAD mortality. Low DHEAS levels appear to be associated with increased mortality from all causes of death in men over the age of 50 (379, 382, 384), giving rise to the notion that this is a nonspecific marker of poor health and of lack of adaptive capacity to acute illnesses or a secondary phenomenon consequent upon various diseases of aging such as malignancies and heart failure (371, 386, 390). Moreover, the postulated relationship between DHEA deficiency and CAD is not ecologically or gender consistent. Thus, DHEAS levels vary greatly between different male populations (379). Japanese men living in Japan have the lowest levels of DHEAS in any study population, but they also have one of the lowest rates of coronary artery disease. The reverse is true for American men in California. Similarly, women have lower DHEAS levels than men—yet they have lower incidences of CAD.

The preliminary Rancho Bernardo analysis on 30 CAD deaths during a 12-yr follow-up of 289 postmenopausal women 60–79 yr of age revealed a positive association between serum levels of DHEAS and cardiovascular and CAD mortality (Ref. 389 and Table 6B). However, in the subsequent report of the 19-yr follow-up of the full cohort of 942 Rancho Bernardo women, cardiovascular and CAD mortality were not associated with serum DHEA levels at baseline (Ref. 391 and Table 6B). This lack of association was confirmed by five other shorter prospective studies (384, 385–388) and one cross-sectional study (60). In contrast, a negative relationship between DHEAS and CAD and atherosclerosis has been documented in cross-sectional studies in younger women (378, 380, 392, 61).

Taken together, data from observational studies on DHEAS do not support the hypothesis that DHEAS deficiency is a risk factor for CAD fatalities or that DHEA may confer an antiatherogenic action in men or women. Low DHEA may be a nonspecific marker for ill health in general.

Interventional studies with DHEA have only been of short duration, and no data are available on the putative effects of DHEA on CAD (393–401, 403, 404). Any effects on cardiovascular risk factors appear to be marginal. In postmenopausal women, application of DHEA results in a slight reduction of HDL-C (396). Female patients with Addison's

TABLE 6. Relationships between circulating HEA and DHEAS levels and CAD in men (A) and women (B)

| First author, year (Ref.)                     | n (age, yr)             | Study type                                  | Hormone      | Endpoint                             | Relationship OR                           |
|-----------------------------------------------|-------------------------|---------------------------------------------|--------------|--------------------------------------|-------------------------------------------|
| <b>A</b>                                      |                         |                                             |              |                                      |                                           |
| Zumoff, 1982 (38)                             | 38, 79 (21–85)          | Cross-sectional                             | DHEA, DHEAS  | CAD, angio                           | Positive                                  |
| Slowinska-Srzednicka, 1989 (47)               | 108 (26–40)             | Cross-sectional                             | DHEAS        | MI, angio                            | Negative                                  |
| Herrington, 1990 (378)                        | 101 (<50)               | Cross-sectional                             | DHEA, DHEAS  | CAD, angio                           | Negative                                  |
| Ishihara, 1992 (380) <sup>b</sup>             | 69 (15–83)              | Cross-sectional                             | DHEA, DHEAS  | Aortic calcific, pulse wave          | Negative                                  |
| Mitchell, 1994 (53) <sup>b</sup>              | 98 (<56)                | Cross-sectional                             | DHEAS        | MI                                   | Negative                                  |
| Herrington, 1995 (381)                        | 206 & 61 (none)         | Cross-sectional                             | DHEA, DHEAS  | Angio, graft vasculopathy            | Negative                                  |
| Feldman, 1998 (55) <sup>b</sup>               | 1709 (40–70)            | Cross-sectional                             | DHEAS        | Heart disease                        | Negative 0.6 (0.5–0.8)                    |
| Hauner, 1991 (50)                             | 274 (30–74)             | Cross-sectional                             | DHEAS        | CAD, angio                           | Null                                      |
| Phillips, 1994 (33)                           | 55 (39–89)              | Cross-sectional                             | DHEAS        | Angio                                | Null                                      |
| Schuler-Lüttmann, 2000 (57)                   | 189 (<70)               | Cross-sectional                             | DHEAS        | CAD, angio                           | Null <sup>c</sup>                         |
| <b>Barrett-Connor, 1986 (377)<sup>b</sup></b> | <b>242 (50–79)</b>      | <b>Prospective cohort 12 yr</b>             | <b>DHEAS</b> | <b>CAD mortality</b>                 | <b>Negative 0.6</b>                       |
| <b>Contoreggi, 1990 (48)<sup>b</sup></b>      | <b>46, 124 (41–92)</b>  | <b>Nested case-control 9.5 yr</b>           | <b>DHEAS</b> | <b>CAD</b>                           | <b>Null</b>                               |
| <b>Lacroix, 1992 (379)<sup>b</sup></b>        | <b>238, 476 (48–71)</b> | <b>Nested case-control 18 yr</b>            | <b>DHEAS</b> | <b>MI, autopsy</b>                   | <b>Negative<sup>c</sup> 0.5 (0.2–1.1)</b> |
| <b>Lacroix, 1992 (379)<sup>b</sup></b>        | <b>238, 476 (48–71)</b> | <b>Nested case-control 18 yr</b>            | <b>DHEAS</b> | <b>CAD, MI</b>                       | <b>Null<sup>d</sup></b>                   |
| <b>Newcomer, 1994 (383)<sup>b</sup></b>       | <b>157, 169 (40–84)</b> | <b>Nested Case-control 28 months</b>        | <b>DHEAS</b> | <b>MI</b>                            | <b>Null 1.0 (0.4–2.6)</b>                 |
| <b>Barrett-Connor, 1995 (382)<sup>b</sup></b> | <b>942 (65.2)</b>       | <b>Prospective cohort 19 yr</b>             | <b>DHEAS</b> | <b>CAD deaths</b>                    | <b>Null</b>                               |
| <b>Barrett-Connor, 1995 (382)<sup>b</sup></b> | <b>942 (65.2)</b>       | <b>Prospective cohort 19 yr</b>             | <b>DHEAS</b> | <b>CAD survivors</b>                 | <b>Negative 0.9</b>                       |
| <b>Berr, 1996 (384)<sup>b</sup></b>           | <b>266 (66–&gt;80)</b>  | <b>Prospective cohort 4 yr</b>              | <b>DHEAS</b> | <b>Cardiovascular deaths</b>         | <b>Null<sup>e</sup></b>                   |
| <b>Jansson, 1998 (385)</b>                    | <b>42, 53 (&lt;70)</b>  | <b>Nested case-control (survivors) 1 yr</b> | <b>DHEAS</b> | <b>Reinfarction &amp; CAD deaths</b> | <b>Null</b>                               |
| <b>Tilvis, 1999 (386)<sup>b</sup></b>         | <b>571 (75–85)</b>      | <b>Prospective cohort 5 yr</b>              | <b>DHEAS</b> | <b>CVD deaths</b>                    | <b>Null</b>                               |
| <b>Kiechl, 2000 (387)<sup>b</sup></b>         | <b>371 (40–79)</b>      | <b>Prospective cohort 5 yr</b>              | <b>DHEAS</b> | <b>CVD, CIMT</b>                     | <b>Null 1.1 (0.9–1.4)</b>                 |
| <b>Trevedi, 2001 (388)<sup>b</sup></b>        | <b>963 (65–7)</b>       | <b>Prospective cohort 7.4 yr</b>            | <b>DHEAS</b> | <b>CVD mortality</b>                 | <b>Null 0.6 (0.3–1.3)</b>                 |
| <b>Hautanen, 1994 (52)</b>                    | <b>62, 97 (48)</b>      | <b>Nested case-control 5 yr</b>             | <b>DHEAS</b> | <b>MI, cardiac deaths</b>            | <b>Positive 2.0 (1.0–4.9)</b>             |
| <b>B</b>                                      |                         |                                             |              |                                      |                                           |
| Herrington, 1990 (378)                        | 103 (<50)               | Cross-sectional                             | DHEA, DHEAS  | CAD, angio                           | Negative                                  |
| Ishihara, 1992 (380)                          | 119 (16–80)             | Cross-sectional                             | DHEAS        | Aortic pulse wave, calcif            | Negative                                  |
| Slowinska-Srzednicka, 1995 (392)              | 35 (35–47)              | Cross-sectional                             | DHEAS        | Coronary Angio, ETT                  | Negative                                  |
| Bermi, 1999 (61) <sup>b</sup>                 | 101 (21–73)             | Cross-sectional                             | DHEAS        | CIMT                                 | Negative                                  |
| Phillips, 1997 (60)                           | 109 (68.9 ± 1.0)        | Cross-sectional                             | DHEAS        | Coronary Angio                       | Null                                      |
| <b>Barrett-Connor, 1987 (389)<sup>b</sup></b> | <b>289 (60–79)</b>      | <b>Prospective cohort 12 yr</b>             | <b>DHEAS</b> | <b>CAD mortality</b>                 | <b>Positive 1.5</b>                       |
| <b>Barrett-Connor, 1995 (391)<sup>b</sup></b> | <b>942 (30–88)</b>      | <b>Prospective cohort 19 yr</b>             | <b>DHEAS</b> | <b>CAD mortality</b>                 | <b>Null 0.9 (0.9–1.2)</b>                 |
| <b>Berr, 1996 (384)<sup>b</sup></b>           | <b>356 (66–&gt;80)</b>  | <b>Prospective cohort 4 yr</b>              | <b>DHEAS</b> | <b>Cardiovascular mortality</b>      | <b>Null</b>                               |
| <b>Jansson, 1998 (385)</b>                    | <b>42, 53 (&lt;70)</b>  | <b>Case-control (survivors) 1 yr</b>        | <b>DHEAS</b> | <b>Reinfarction &amp; CAD deaths</b> | <b>Null</b>                               |
| <b>Tilvis, 1999 (386)<sup>b</sup></b>         | <b>571 (75–85)</b>      | <b>Prospective cohort 5 yr</b>              | <b>DHEAS</b> | <b>CVD deaths</b>                    | <b>Null U-shaped</b>                      |
| <b>Kiechl, 2000 (387)<sup>b</sup></b>         | <b>496 (40–79)</b>      | <b>Prospective cohort 5 yr</b>              | <b>DHEAS</b> | <b>CVD, CIMT</b>                     | <b>Null 1.0 (0.9–1.2)</b>                 |
| <b>Trevedi, 2001 (388)<sup>b</sup></b>        | <b>1171 (65–76)</b>     | <b>Prospective cohort 7.4 yr</b>            | <b>DHEAS</b> | <b>CVD mortality</b>                 | <b>Null 1.0 (0.4–2.5)</b>                 |

CVD, Cardiovascular disease; CIMT, carotid intima-media thickness ultrasound; Angio, coronary angiography.

Negative relationship indicates lower DHEAS(S) levels in patients with CAD compared to controls, positive relationship indicates higher DHEAS(S) levels in CAD, and a null relationship indicates no difference between cases and controls.

For prospective cohort or nested case-control studies, the number of cases (first n) and controls (second n) and duration under study.

Highlighted in *bold* are the most important studies in terms of adequacy of design, statistical power, and allowance for confounding factors.

<sup>a</sup> Negative only upon univariate analysis, null upon multivariate analysis.

<sup>b</sup> Population sample rather than patients.

<sup>c</sup> Fatal cases.

<sup>d</sup> Nonfatal cases.

disease administered oral DHEA, 50 mg daily for 3–4 months, showed either no change (401) or a decrease in total and HDL-C (398), whereas a relatively greater increase in T was induced by DHEA bioconversion. In men aged 60–84 yr, DHEA, 100 mg daily for 3 months, decreased total and HDL-C (403), but this was not confirmed in a larger study (404).

In animal studies, in contrast to the conflicting data on the effects of exogenous T on diet-induced atherosclerosis, DHEA administration to rabbits seems to consistently decrease atherosclerosis. Thus, all five studies (Table 2 and Refs. 117 and 405–408) in intact or castrated male and female rabbits treated by DHEA for between 5 and 30 wk showed a significant reduction in the extent of spontaneous or balloon injury-induced aortic or cardiac transplant atherosclerotic lesions independently of changes in lipids. DHEA may therefore be considered favorable under these rather artificial experimental conditions. Although estrogens were not measured in these studies, it is probable that DHEA administered in pharmacological doses to animals (rabbits) with little endogenous adrenal androgen production would be converted to estrogenic metabolites with potent actions on the vascular endothelium. This is supported by the findings of Hayashi *et al.* (408), who demonstrated that the antiatherogenic effects of DHEA in ovariectomized female rabbits can be partially (50%) blocked by the aromatase inhibitor fadrozole. Together with the fact that no specific receptors for DHEA have yet been identified, it is plausible that this steroid primarily acts as a prohormone for more potent metabolites. In the context of atherosclerosis, pharmacological doses of DHEA may well be feeding the estrogenic rather than the androgenic bioconversion pathways. One should therefore be circumspect in extrapolating to man the apparent beneficial actions of DHEA suggested by animal studies because exposure to similarly high pharmacological doses has not been investigated and may not be acceptable clinically.

In experimental studies, DHEA facilitates fibrinolysis (409) and inhibits platelet aggregation (410), lipid accumulation in mouse macrophage foam cell cultures (411), and proliferation and migration of vascular SMC lines (412). DHEA has also been shown to reduce IL-6, IL-1 $\beta$ , and TNF $\alpha$  in mouse macrophages (413) and IL-6 in human mononuclear cells *in vitro* (414) and to reduce TNF $\alpha$  in mice and rats *in vivo* (415, 416). The use of animals with negligible physiological adrenal androgen production and pharmacological doses of DHEA again render these *in vivo* and *in vitro* experimental data of doubtful relevance to man.

In summary, the epidemiological and experimental data on the relationship between DHEA and CAD are inconsistent and unconvincing. No definitive conclusions or clinical recommendations can be drawn from the existing evidence base.

## IX. Estrogens and Cardiovascular Disease in Men

There is compelling evidence indicating that an increasing number of physiological actions of T in men are mediated by the ERs after conversion to estradiol by site-specific aromatases in target tissues (368). The extraglandular production of

estrogens (with circulating androgens as the immediate precursor substrate) may therefore play a role in male cardiovascular physiology and pathophysiology. Estrogens are generally regarded as antiatherogenic and therefore protective against CAD. Estrogens increase HDL-C, decrease Lp(a), and prevent lipid peroxidation. There is also evidence from animal models and *in vitro* experiments that estrogens exert direct effects on the vascular wall. Estradiol mediates vasodilatation and inhibits SMC proliferation/migration, modulates the vascular inflammatory response by inhibiting cytokine activation and expression of cell adhesion molecules, and inhibits platelet aggregation and adhesion (for reviews, see Refs. 11, 274, 295, and 327–331). Thus, vasoprotection by estrogens can be mediated via either classical ER-mediated genomic (*e.g.*, cell proliferation, structural remodeling, or lipid distribution) or the rapid nongenomic pathways (*e.g.*, changes in vasomotor tone). The latter may involve direct action via L type calcium channels in vascular SMCs or membrane ER-mediated activation of NO synthase and cGMP-dependent calcium-activated potassium channels (314). ER $\alpha$ , ER $\beta$ , aromatase, and 17 $\beta$ -hydroxysteroid dehydrogenase are expressed in many cell types in the vasculature (see Section VII.A).

The importance of locally produced estrogens from aromatization of T in males for cardiovascular health has been tantalizingly highlighted by recent human and transgenic mouse models of aromatase deficiency and estrogen resistance. In two men with undetectable circulating estradiol and estrone and high T due to P450 aromatase deficiency (417, 418), dyslipidemia with elevated total and LDL-C and triglyceride and decreased HDL-C was associated with insulin resistance (in the first patient only). These metabolic abnormalities were correctable by low-dose oral or transdermal estrogen replacement. In a 28-yr-old male with a null mutation in ER $\alpha$  gene causing estrogen resistance (419), insulin resistance, acanthosis nigricans, and impaired glucose tolerance were apparent. HDL-C and LDL-C were low. Intact hepatic ER $\beta$  may have prevented full expression of dyslipidemia. Ultrafast electron beam computed tomography imaging showed calcium deposition in the proximal left anterior descending coronary artery, indicating the presence of premature atherosclerosis (420). Flow-mediated, endothelial-dependent, and NO-activated brachial artery vasodilatation (membrane ER-mediated) in response to hyperemia was absent, showing marked endothelial dysfunction (421). Preservation of response to nitroglycerin indicates that NO action in vascular SMCs is intact. The nongenomic rapid vasodilatation in response to a sublingual dose of 2 mg of estradiol also remained intact.

These recent findings suggest that estrogens are important in maintaining normal carbohydrate and lipid metabolism as well as normal endothelial-dependent, NO-mediated vasodilatation in men. They are compatible with data from transgenic knockout models confirming that ER $\alpha$  is important in preventing adipocyte hypertrophy, obesity, insulin resistance, and hypercholesterolemia (422–424), and maintaining basal NO release from vascular endothelium (425) in male animals and ER $\beta$  in vascular smooth muscle may also regulate vascular sensitivity to estradiol (316, 426). The favorable effects of estrogens on HDL-C that have been demon-

strated are also in accord with clinical studies using aromatase inhibitors in normal men (see *Section VI.C.1*) and the prevention of early atherosclerosis in LDL-receptor-deficient mice (122a).

The complex interplay between the endocrine actions of androgens and the paracrine or autocrine actions of locally produced estrogens in target tissues is critical for isosexual physiological regulation of metabolic and vascular functions by sex hormones in both men and women. Better understanding of these mechanisms is likely to yield new opportunities for selective abrogation or stimulation of specific effects with the goal of cardiovascular disease prevention and amelioration in the future.

## X. Summary and Conclusion

The gender difference in CAD cannot be explained on the basis of endogenous sex hormone exposure. None of the epidemiological studies in the literature showed a positive association between T and CAD in men to suggest that high levels of this androgen may be a risk factor, with all the longitudinal studies consistently showing a lack of relationship. Data on women also do not suggest that endogenous T plays a causal or protective role for CAD, but PCOS patients undoubtedly have an adverse risk profile. Whether this leads to increased premature heart disease is currently unclear. Observational studies on DHEAS do not support the hypothesis that DHEAS deficiency is a risk factor for CAD in men or women.

In men, endogenous T is correlated positively with HDL-C and negatively with LDL-C, triglycerides, fibrinogen, and PAI-1. In women, these relationships are reversed. However, hypoandrogenemia in men and hyperandrogenemia in women are confounded by central obesity and insulin resistance. These associations are therefore uninformative with respect to a direct pro- or antiatherogenic role of androgens.

Interventional studies generally do not show a causal relationship between T exposure and the development of CAD. Short-term studies suggest T treatment may improve exercise ECG in men with established CAD. The majority of animal experiments found exogenous T and DHEA(S) to exert neutral or beneficial effects on atherosclerosis in male and detrimental effects in female animals.

Exogenous androgens induce both apparently beneficial and deleterious effects on cardiovascular risk factors by decreasing serum levels of HDL-C, PAI-1 (apparently deleterious) Lp(a), fibrinogen, insulin, leptin, and visceral fat mass (apparently beneficial) in men as well as women. However, androgen-induced declines in circulating HDL-C should not automatically be assumed to be proatherogenic, because these declines may reflect accelerated reverse cholesterol transport instead.

Supraphysiological concentrations of T stimulate vasorelaxation including coronary arteries; but at physiological concentrations, beneficial, neutral, and detrimental effects on vascular reactivity can be observed. They may involve direct and indirect, endothelium-dependent and endothelium-independent, genomic and nongenomic modes of action. The importance of locally converted estradiol on vascular

reactivity in men has recently been demonstrated in estrogen-resistant and aromatase-deficient models. T exerts proatherogenic effects *in vitro* on macrophage functions by facilitating the uptake of modified lipoproteins and an antiatherogenic effect by stimulating SR-B1-mediated cholesterol efflux of cellular cholesterol to HDL.

In conclusion, endogenous androgens do not show any consistent association with CAD. Androgens can exert both apparently beneficial and deleterious actions on a multitude of factors implicated in the pathogenesis of atherosclerosis and CAD. Current evidence does not permit any meaningful assessment of the net effects of T or DHEAS on cardiovascular disease risks in men or women.

## XI. Clinical Implications

On the basis of current evidence, efforts to exploit the wider therapeutic benefits of T in men should not be deterred or hampered by concerns regarding increased CAD risks. In the presence of evidence of androgen deficiency, the initiation and continuation of T replacement therapy is not contraindicated in male patients with known CAD.

In elderly men, it has been suggested (on the basis of short-term ECG changes in a few small studies only) that androgen replacement, in addition to possible benefits on muscle, bone, sexual, and mental functions, may also ameliorate CAD. Given the current lack of long-term morbidity and mortality data, it will be difficult to justify large-scale primary or secondary prevention trials specifically to investigate the possible benefits of androgens in CAD, especially when there are other established medical treatment modalities (*e.g.*, weight reduction, smoking cessation, exercise, aspirin, statins, antihypertensives, beta-blockers, and vasodilators) that are of proven benefit. One way out of this conundrum may be to target high-prevalence patient groups (*e.g.*, type 2 diabetics, hyperlipidemics) for smaller-scale interventional studies and also to incorporate subclinical non-invasive disease endpoints (*e.g.*, circulatory markers of endothelial dysfunction, ultrasonic carotid intimal-media thickness, and waveform and computer tomography scanning of coronary artery calcification) in addition to morbidity and mortality.

In women, the possibility that spontaneous or induced hyperandrogenemia may be associated with increased risks for CAD should be seriously considered. Thus, clinical evidence of hyperandrogenism in PCOS is a biomarker for the metabolic diathesis associated with increased risks for type 2 (and gestational) diabetes, hypertension, stroke, and possibly CAD in later life. Because PCOS can affect 4–11% of premenopausal women (427, 428), this represents both an early and a valuable primary prevention opportunity in a substantial population of at-risk women. Insulin-sensitizing drugs (biguanides and thiazolidinediones) are increasingly being used in the management of current problems such as anovulation, oligomenorrhea, and hirsutism in women with PCOS (429). Whether these drugs, by improving insulin sensitivity and ameliorating hyperandrogenism and dyslipidemia, will also reduce the future risk of cardiovascular disease in PCOS patients should be a goal for future prospective investigations.



### Acknowledgments

Address all correspondence and requests for reprints to: Dr. F. C. W. Wu, Department of Endocrinology, Manchester Royal Infirmary, Oxford Road, Manchester M13 9WL, England, United Kingdom. E-mail: frederick.wu@man.ac.uk

A.v.E. was supported by a grant from "Interdisziplinäres Zentrum für Klinische Forschung der Medizinischen Fakultät Münster," Germany (Project A3 on "Androgens as Modulators of Atherosclerosis").

### References

- Bhasin S, Bremner WJ 1997 Clinical review 85: emerging issues in androgen replacement therapy. *J Clin Endocrinol Metab* 82:3–7
- Davies SR 1999 Androgen replacement in women: a commentary. *J Clin Endocrinol Metab* 84:1886–1891
- Lopez AD, Murray CCJL 1998 The global burden of disease, 1990–2020. *Nat Med* 4:1241–1243
- Lerner DJ, Kannel WB 1986 Patterns of coronary heart disease morbidity and mortality in the sexes: a 26-year follow-up of the Framingham population. *Am J Cardiol* 111:383–390
- Lloyd-Jones DM, Larson MG, Beiser A, Levit D 1999 Lifetime risk of developing coronary heart disease. *Lancet* 353:89–92
- Kalin MF, Zumoff B 1990 Sex hormones and coronary disease: a review of the clinical studies. *Steroids* 55:330–352
- Assmann G, Cullen P, Jossa F, Lewis B, Mancini M 1999 Coronary heart disease: reducing the risk. The scientific background to primary and secondary prevention of coronary heart disease. A worldwide view. International Task force for the Prevention of Coronary Heart disease. *Arterioscler Thromb Vasc Biol* 19:1819–1824
- Levy D, Kannel WB 2000 Search for answers to ethnic disparities in cardiovascular risk. *Lancet* 356:266–267
- Barrett-Connor E 1997 Sex difference in coronary heart disease. *Circulation* 95:252–264
- Kohler HP, Grant PJ 2000 Plasminogen-activator inhibitor type 1 and coronary artery disease. *N Engl J Med* 342:1792–1801
- Hayward CS, Kelly RP, Collins P 2000 The roles of gender, the menopause and hormone replacement on cardiovascular function. *Cardiovasc Res* 46:28–49
- Hayashi T, Fukuto J M, Ignarro I, Chadhun G 1992 Basal release of nitric oxide from aortic rings is greater in female rabbits than in male rabbits: implications for atherosclerosis. *Proc Natl Acad Sci USA* 89:11259–11263
- Tejera N, Balfagón N, Marin J, Ferrer M 1999 Gender differences in endothelial regulation of 2-adrenoceptor-mediated contraction in the rat aorta. *Clin Sci* 97:19–25
- McCrohon JA, Death AK, Nakhla S, Jessup W, Handelsman DJ, Stanley KK, Celmaj DS 2000 Androgen receptor expression is greater in macrophages from male than from female donors. A sex difference with implications for atherogenesis. *Circulation* 101:224–226
- Lemieux S, Prud'homme D, Bouchard C, Tremblay A, Despres JP 1993 Sex differences in the relation of visceral adipose tissue accumulation total body fatness. *Am J Clin Nutr* 58:463–467
- Alexandersen P, Haarbo J, Christiansen C 1996 The relationship of natural androgens to coronary heart disease in males: a review. *Atherosclerosis* 125:1–13
- Zitzmann M, Nieschlag E 2001 Testosterone levels in healthy men and their relation to behavioural and physical characteristics: facts and constructs. *Eur J Endocrinol* 144:183–197
- Bremner WJ, Prinz PN 1983 A loss of circadian rhythmicity in blood testosterone levels with aging in normal men. *J Clin Endocrinol Metab* 56:499–511
- Harman SM, Metter EJ, Tobin JD, Pearson J, Blackman MR 2001 Longitudinal effects of aging on serum total and free testosterone levels in healthy men. *J Clin Endocrinol Metab* 86:724–731
- Mendoza SG, Zerpa A, Carrasco H, Colmenares G, Rangel A, Gartside PS, Kashyap ML 1983 Estradiol, testosterone, apolipoproteins, lipoprotein cholesterol and lipolytic enzymes in men with premature myocardial infarction and angiographically assessed coronary occlusion. *Artery* 12:1–23
- Barth JD, Jansen H, Hugenholtz PG, Birkenhager JC 1983 Post heparin lipases, lipids and related hormones in men undergoing coronary arteriography to assess atherosclerosis. *Atherosclerosis* 48:235–241
- Hromadova M, Hacik T, Rieicansky I 1985 Concentration of lipid, apoprotein-B and testosterone in patients with coronarographic findings. *Klin Wochenschr* 63:1071–1074
- Breier C, Muhlberger V, Drexel H, Herold M, Lisch HJ, Knapp E, Braunsteiner H 1985 Essential role of post-heparin lipoprotein lipase activity and of plasma testosterone in coronary artery disease. *Lancet* 1:1242–1244
- Aksut SV, Aksut G, Karamehmetoglu A, Oram E 1986 The determination of serum estradiol, testosterone and progesterone in acute myocardial infarction. *Jpn Heart J* 27:825–837
- Sewdarsen M, Jialal I, Vythilingum S, Desai R 1986 Sex hormone levels in young Indian patients with myocardial infarction. *Arteriosclerosis* 6:418–421
- Chute CG, Baron JA, Plymate SR, Kiel DP, Pavia AT, Lozner EC, O'Keefe T, MacDonald GJ 1987 Sex hormones and coronary artery disease. *Am J Med* 83:853–859
- Hämäläinen E, Tikkanen H, Härkönen M, Näveri H, Adlercreutz H 1987 Serum lipoproteins, sex hormones and sex hormone binding globulin in middle-aged men of different physical fitness and risk of coronary heart disease. *Atherosclerosis* 67:155–162
- Lichtenstein MJ, Yamell JW, Elwood PC, Beswick AD, Sweetnam PM, Marks V, Teale D, Riad-Fahmy D 1987 Sex hormones, insulin, lipids, and prevalent ischemic heart disease. *Am J Epidemiol* 126:647–657
- Swartz CM, Young MA 1987 Low serum testosterone and myocardial infarction in geriatric male inpatients. *J Am Geriatr Soc* 35:39–44
- Sewdarsen M, Jialal I, Naidu RK 1988 The low plasma testosterone levels of young Indian infarct survivors are not due to a primary testicular defect. *Postgrad Med J* 64:264–266
- Sewdarsen M, Vythilingum S, Jialal I, Desai RK, Becker P 1990 Abnormalities in sex hormones are a risk factor for premature manifestation of coronary artery disease in South African Indian men. *Atherosclerosis* 83:111–117
- Rice T, Sprecher DL, Borecki IB, Mitchell LE, Laskarzewski PM, Rao DC 1993 Cincinnati myocardial infarction and hormone family study: family resemblance for testosterone in random and MI families. *Am J Med Genet* 47:542–549
- Phillips GB, Pinkernell BH, Jing TY 1994 The association of hypotestosteronemia with coronary artery disease in men. *Arterioscler Thromb Vasc Biol* 14:701–706
- Zhao SP, Li XP 1998 The association of low plasma testosterone level with coronary artery disease in Chinese men. *Int J Cardiol* 63:161–164
- English KM, Mandour O, Steeds RP, Jones TH, Channer KS 2000 Men with coronary disease have lower levels of androgens than those with coronary angiograms. *Eur Heart J* 21:890–895
- Luria MH, Johnson MW, Pego R, Seuc CA, Manubens SJ, Wieland MR, Wieland RG 1982 Relationship between sex hormones, myocardial infarction, and occlusive coronary disease. *Arch Intern Med* 142:42–44
- Labropoulos B, Velonakis E, Oekonomakos P, Laskaris J, Katsimades D 1982 Serum sex hormones in patients with coronary disease and their relationship to known factors causing atherosclerosis. *Cardiology* 69:98–103
- Zumoff B, Troxler RG, O'Connor J, Rosenfeld RS, Kream J, Levin J, Hickman JR, Sloan AM, Walker W, Cook RL, Fukushima DK 1982 Abnormal hormone levels in men with coronary artery disease. *Arteriosclerosis* 2:58–67
- Phillips GB, Castelli WP, Abbott RD, McNamara PM 1983 Association of hyperestrogenemia and coronary heart disease in men in the Framingham cohort. *Am J Med* 74:863–869
- Heller RF, Wheeler MJ, Micallef J, Miller NE, Lewis B 1983 Relationship of high density lipoprotein cholesterol with total and free testosterone and sex hormone binding globulin. *Acta Endocrinol (Copenh)* 104:253–256
- Small M, Lowe GDO, Beastall GH, Beattie JM, McEachern M, Hutton I, Lorimar AR, Forbes CD 1985 Serum oestradiol and

- ischaemic heart disease relationship with myocardial infarction but not coronary atheroma or haemostasis. *Q J Med* 57:775–782
42. **Franzen J, Fex G** 1986 Low serum apolipoprotein A-1 in acute myocardial infarction survivors with normal HDL cholesterol. *Atherosclerosis* 59:37–42
  43. **Cauley JA, Gutai JP, Kuller LH, Dai WS** 1987 Usefulness of sex steroid hormone levels in predicting coronary artery disease in men. *Am J Cardiol* 60:771–777
  44. **Baumann G, Reza P, Chatterton R, Green D, Krumlovsky F** 1988 Plasma estrogens, androgens, and von Willebrand factor in men on chronic hemodialysis. *Int J Artif Organs* 11:449–453
  45. **Barrett-Connor E, Khaw KT** 1988 Endogenous sex hormones and cardiovascular disease in men. A prospective population based study. *Circulation* 78:539–545
  46. **Phillips GB, Yano K, Stemmerman GN** 1988 Serum sex hormone levels and myocardial infarction in the Honolulu Heart Program. Pitfalls in prospective studies on sex hormones. *J Clin Epidemiol* 41:1151–1156
  47. **Slowinska-Szrednicka J, Zgliczynski S, Ciswicka-Sznajderman M, Scredicki M, Soszynski P, Biernacka M, Woroszylska M, Ruzyllo W, Sadowski Z** 1989 Decreased plasma dehydroepiandrosterone sulfate and dihydrotestosterone concentrations in young men after myocardial infarction. *Atherosclerosis* 79:197–203
  48. **Contoreggi CS, Blackman MR, Andres R, Muller DC, Lakatta EG, Fleg JL, Harman SM** 1990 Plasma levels of estradiol, testosterone, and DHEAS do not predict risk of coronary artery disease in men. *J Androl* 11:460–470
  49. **Cengiz K, Alvur M, Dindar U** 1991 Serum creatinine phosphokinase, lactic dehydrogenase, estradiol, progesterone, and testosterone levels in male patients with acute myocardial infarction and unstable angina pectoris. *Mater Med Pol* 23:195–198
  50. **Hauner H, Stangl K, Burger K, Busch U, Blomer H, Pfeiffer EF** 1991 Sex hormone concentration in men with angiographically assessed coronary artery disease—relationship to obesity and body fat distribution. *Klin Wochenschr* 69:664–668
  51. **Yarnell JWG, Beswick AD, Sweetnam PM, Riad-Fahmy D** 1993 Endogenous sex hormones and ischaemic heart disease in men. The Caerphilly prospective study. *Arterioscler Thromb* 13:517–520
  52. **Hautonen A, Manttari M, Manninen V, Tenkanen L, Huttunen JK, Frick MH, Adlercreutz H** 1994 Adrenal androgens and testosterone as coronary risk factors in the Helsinki heart study. *Atherosclerosis* 105:191–200
  53. **Mitchell LE, Sprecher DL, Borecki IB, Rice T, Laskarzewski PM** 1994 Evidence for an association between dehydroepiandrosterone sulfate and non-fatal, premature myocardial infarction in males. *Circulation* 89:89–93
  54. **Marquez-Vidal P, Sie P, Cambou J-P, Chap H, Perret B** 1995 Relationships of plasminogen activator inhibitor activity and lipoprotein (a) with insulin, testosterone, 17 $\beta$ -estradiol, and testosterone binding globulin in myocardial infarction patients and healthy controls. *J Clin Endocrinol Metab* 80:1794–1798
  55. **Feldman HA, Johannes CB, McKinlay JB, Longcope C** 1998 Low dehydroepiandrosterone sulfate and heart disease in middle-aged men: cross-sectional results from the Massachusetts male aging study. *Ann Epidemiol* 8:217–228
  56. **Kabakci G, Yildirim A, Can I, Unsal I, Erbas B** 1999 Relationship between endogenous sex hormone levels, lipoproteins and coronary atherosclerosis in men undergoing coronary angiography. *Cardiology* 92:221–225
  57. **Schuler-Lüttmann S, Mönnig G, Enbergs A, Schulte H, Breithardt G, Assmann G, Kerber S, von Eckardstein A** 2000 Insulin-like growth factor binding protein-3 is associated with the presence and extent of coronary arteriosclerosis. *Arterioscler Thromb Vasc Biol* 20:e10–e15
  58. **Dobs AS, Schrott H, Davidson MH, Bays H, Stein EA, Kush D, Wu M, Mitchel Y, Illingworth RD** 2000 Effects of high-dose simvastatin on adrenal and gonadal steroidogenesis in men with hypercholesterolemia. *Metabolism* 49:1234–1238
  59. **Barrett-Connor EL, Goodman-Gruen D** 1995 Prospective study of endogenous sex hormones and fatal cardiovascular disease in postmenopausal women. *Br Med J* 311:1193–1196
  60. **Phillips GB, Pinkernell BH, Jing TY** 1997 Relationship between serum sex hormones and coronary artery disease in postmenopausal women. *Arterioscler Thromb Vasc Biol* 17:695–701
  61. **Bernini GP, Sgro M, Moretti A, Argenio GF, Barlascini CO, Cristofani R, Salvetti A** 1999 Endogenous androgens and carotid intimal-medial thickness in women. *J Clin Endocrinol Metab* 84:2008–2012
  62. **Wild RA** 1995 Obesity, lipids, cardiovascular disease risk and androgen excess. *Am J Med* 98(Suppl 1A):27S–32S
  63. **McKeigue P** 1996 Cardiovascular disease and diabetes in women with polycystic ovary syndrome. *Baillieres Clin Endocrinol Metab* 10:311–318
  64. **Wild RA** 1997 Metabolic aspects of polycystic ovary syndrome. *Semin Reprod Endocrinol* 15:105–110
  65. **Dunaif A** 1997 Insulin resistance and the polycystic ovary syndrome: mechanism and implications for pathogenesis. *Endocr Rev* 18:774–800
  66. **Amowitz LL, Sobel BE** 1999 Cardiovascular consequences of polycystic ovary syndrome. *Endocrinol Metab Clin North Am* 28:439–458
  67. **Sobel BE** 1999 The potential influence of insulin and plasminogen activator inhibitor type 1 on the formation of vulnerable atherosclerotic plaques associated with type 2 diabetes. *Proc Assoc Am Physicians* 111:313–318
  68. **Rajkhowa M, Glass MR, Rutherford AJ, Michelmore K, Balen AH** 2000 Polycystic ovary syndrome: a risk factor for cardiovascular disease? *Br J Obstet Gynaecol* 107:11–18
  69. **Lobo RA, Carmina E** 2000 The importance of diagnosing the polycystic ovary syndrome. *Ann Intern Med* 132:989–993
  70. **Tabott EO, Zborowski JV, Sutton-Tyrell K, McHugh-Pemu P, Cuzick DS** 2001 Cardiovascular risk in women with polycystic ovarian syndrome. *Obstet Gynecol Clin North Am* 28:111–133
  71. **Dahlgren E, Johansson S, Lindstedt G, Knutsson F, Oden A, Janson PO, Mattson LA, Crona N, Lundberg PA** 1992 Woman with polycystic ovary syndrome wedge resected in 1956 to 1965: a long-term follow-up focussing on natural history and circulating hormones. *Fertil Steril* 57:505–513
  72. **Wild RA, Grubb B, Hartz A, Van Nort JJ, Bachman W, Bartholomew M** 1990 Clinical signs of androgen excess as risk factors for coronary artery disease. *Fertil Steril* 54:255–259
  73. **Birdsall M, Farquhar C, White H** 1997 Association between polycystic ovaries and extent of coronary artery disease in women having cardiac catheterization. *Ann Intern Med* 126:32–35
  74. **Guzick DS, Talbott EO, Sutton-Tyrell K, Herzog HC, Kuller LH, Wolfson Jr SK** 1996 Carotid atherosclerosis in women with polycystic ovary syndrome: initial results from a case-control study. *Am J Obstet Gynecol* 174:1224–1229; discussion 1229–1232
  75. **Talbott EO, Guzick DS, Sutton-Tyrell K, McHugh-Pemu KP, Zborowski JV, Remsberg KE, Kuller LH** 2000 Evidence for association between polycystic ovary syndrome and premature carotid atherosclerosis in middle-aged women. *Arterioscler Thromb Vasc Biol* 20:2414–2421
  76. **Cibula D, Cifkova R, Fanta M, Poledne R, Zivny J, Skibova J** 2000 Increased risk of non-insulin dependent diabetes mellitus, arterial hypertension and coronary artery disease in perimenopausal women with a history of the polycystic ovarian syndrome. *Hum Reprod* 15:785–789
  77. **Christian RC, Dumesic DA, Vrtiska TJ, Sheedy PF, Behrenbeck T, Fitzpatrick LA** Clinical hyperandrogenism and body mass index predict coronary calcification in perimenopausal women with polycystic ovarian syndrome (PCOS). Program of the 82nd Annual Meeting of The Endocrine Society, Toronto, Canada, 2000, p 400 (Abstract 1652)
  78. **Mather KJ, Kwan F, Corenblum B** 2000 Hyperinsulinemia in polycystic ovary syndrome correlates with increased cardiovascular risk independent of obesity. *Fertil Steril* 73:150–156
  79. **Pierpoint T, McKeigue PM, Isaacs AJ, Wild SH, Jacobs HS** 1998 Mortality of women with polycystic ovary syndrome at long-term follow-up. *J Clin Epidemiol* 51:581–586
  80. **Wild S, Pierpoint T, McKeigue P, Jacobs HS** 2000 Cardiovascular disease in women with polycystic ovary syndrome at long-term follow-up: a retrospective cohort study. *Clin Endocrinol (Oxf)* 52:595–600
  81. **Elting MW, Korsen TJM, Bezemer PD, Schoemaker J** 2001 Prev-

- alence of diabetes, hypertension, and cardiac complaints in a follow-up study of a Dutch PCOS population. *Hum Reprod* 16: 556–560
82. **Hamilton JB, Mestler GE** 1969 Mortality and survival: comparison of eunuchs with intact men and women in a mentally retarded population. *J Gerontol* 24:395–411
  83. **Nieschlag E, Nieschlag S, Behre HM** 1993 Lifespan and testosterone. *Nature* 366:215
  84. **Wilson JD, Roehrborn C** 1999 Long-term consequence of castration in men: lessons from the Skoptzy and the eunuchs of the Chinese and Ottoman courts. *J Clin Endocrinol Metab* 84:4324–4331
  85. **Van Kesteren PJ, Asscheman H, Megens JA, Gooren LJ** 1997 Mortality and morbidity in transsexual subjects treated with cross-sex hormones. *Clin Endocrinol (Oxf)* 47:337–342
  86. **Wilson JD** 1988 Androgen abuse by athletes. *Endocr Rev* 9:181–199
  87. **Council on Scientific Affairs** 1990 Medical and Non-medical uses of anabolic-androgenic steroids. *JAMA* 264:2923–2937
  88. **Yesalis CE, Kennedy NJ, Kopstein AN, Bahrke MS** 1993 Anabolic-androgen steroid use in the United States. *JAMA* 270:1217–1221
  89. **Rockhold RW** 1993 Cardiovascular toxicity of anabolic steroids. *Annu Rev Pharmacol Toxicol* 33:497–520
  90. **Sullivan ML, Martinez CM, Gennis P, Gallagher EJ** 1998 The cardiac toxicity of anabolic steroids. *Prog Cardiovasc Dis* 41:1–15
  91. **Bonnel RW, Pritchett CP, Rardin TE** 1941 Treatment of angina pectoris and coronary artery disease with sex hormones. *Ohio State Med J* 37:554
  92. **Hamm L** 1942 Testosterone propionate in the treatment of angina pectoris. *J Clin Endocrinol Metab* 2:325–328
  93. **Walker TC** 1942 Use of testosterone propionate and estrogenic substance in treatment of essential hypertension, angina pectoris, and peripheral vascular disease. *J Clin Endocrinol Metab* 2:560–568
  94. **Sigler LH, Tuglan J** 1943 Treatment of angina pectoris with testosterone propionate. *NY State J Med* 43:1424–1428
  95. **Levine S, Likoff W** 1943 The therapeutic value of testosterone propionate in angina pectoris. *N Engl J Med* 228:770–773
  96. **Opit L** 1943 The treatment of angina pectoris and essential hypertension by testosterone propionate. *Med J Aust* 12:546
  97. **Opit L** 1943 The treatment of angina pectoris by testosterone propionate. *Med J Aust* 14:137
  98. **Lesser MA** 1942 The treatment of angina pectoris with testosterone propionate; preliminary report. *N Engl J Med* 226:51–54
  99. **Lesser MA** 1943 The treatment of angina pectoris with testosterone propionate: further observations. *N Engl J Med* 228:185–188
  100. **Strong GF, Wallace AW** 1944 Treatment of angina pectoris and peripheral vascular disease with sex hormones. *Can Med Assoc J* 50:30–33
  101. **Lesser MA** 1946 Testosterone propionate therapy in one hundred cases of angina pectoris. *J Clin Endocrinol Metab* 6:549–557
  102. **Webb CM, Adamson DL, de Zeigler D, Collins P** 1999 Effect of acute testosterone on myocardial ischemia in men with coronary artery disease. *Am J Cardiol* 83:437–439
  103. **Webb CM, McNeill JG, Hayward CS, de Zeigler D, Collins P** 1999 Effects of testosterone on coronary vasomotor regulation in men with coronary heart disease. *Circulation* 100:1690–1696
  104. **Rosano GM, Leonardo F, Pagnotta P, Pelliccia F, Panina G, Cerquetani E, della Monica PL, Bonfigli B, Volpe M, Chierchia SL** 1999 Acute anti-ischemic effect of testosterone in men with coronary artery disease. *Circulation* 99:1666–1670
  105. **Jaffe MD** 1977 Effect of testosterone on postexercise ST segment depression. *Br Heart J* 39:1217–1222
  106. **Wu SZ, Weng XZ** 1993 Therapeutic effects of an androgenic preparation on myocardial ischemia and cardiac function in 62 elderly male coronary heart disease patients. *Chin Med J* 106:415–418
  107. **English KM, Steed RP, Diver MJ, Jones TH, Channer KS** 2000 Low dose transdermal testosterone therapy improves angina threshold in men with chronic stable angina. *Circulation* 102:1906–1911
  108. **Snyder PJ** 2001 Editorial: the role of androgens in women. *J Clin Endocrinol Metab* 86:1006–1007
  109. **Miller KK, Sessimo G, Schiller A, Schonfeld D, Burton S, Klubanski A** 2001 Androgen deficiency in women with hypopituitarism. *J Clin Endocrinol Metab* 86:561–567
  110. **Judd HL, Lucas WE, Yen SSC** 1974 Effect of oophorectomy on circulating testosterone and androstenedione levels in patients with endometrial cancer. *Am J Obstet Gynecol* 118:793–798
  111. **Judd HL** 1976 Hormonal dynamics associated with the menopause. *Clin Obstet Gynecol* 19:775–768
  112. **Davis SR, Tran J** 2001 Testosterone influences libido and well being in women. *Trends Endocrinol Metab* 12:33–37
  113. **Toda T, Toda Y, Cho BH, Kummerow FA** 1984 Ultrastructural changes in the comb and aorta of chicks fed excess testosterone. *Atherosclerosis* 51:47–53
  114. **Larsen BA, Nordestgaard BG, Stender S, Kjeldsen K** 1993 Effect of testosterone on atherogenesis in cholesterol-fed rabbits with similar plasma cholesterol levels. *Atherosclerosis* 99:79–86
  115. **Fogelberg M, Björkhem I, Diczfalusy U, Henriksson P** 1990 Stanozolol and experimental atherosclerosis: atherosclerosis development and blood lipids during anabolic steroid therapy of New Zealand white rabbits. *Scand J Clin Lab Invest* 50:693–700
  116. **Adams MR, Williams JK, Kaplan JR** 1995 Effects of androgens on coronary artery atherosclerosis and atherosclerosis-related impairment of vascular responsiveness. *Arterioscler Thromb Vasc Biol* 15:562–570
  117. **Chen SJ, Li HB, Durand J, Oparil S, Chen YF** 1996 Estrogen reduces myointimal proliferation after balloon injury of rat carotid artery. *Circulation* 93:577–584
  118. **Bruck B, Brehme U, Gugel N, Hanke S, Finking G, Lutz C, Benda N, Schmahl FW, Haasis R, Hanke H** 1997 Gender-specific differences in the effects of testosterone and estrogen on the development of atherosclerosis in rabbits. *Arterioscler Thromb Vasc Biol* 17: 2192–2199
  119. **Alexandersen P, Haarbo J, Byrjalsen I, Lawaetz H, Christiansen C** 1999 Natural androgens inhibit male atherosclerosis: a study in castrated, cholesterol-fed rabbits. *Circ Res* 84:813–819
  120. **Obasanjo IO, Clarkson TB, Weaver DS** 1996 Effects of the anabolic steroid nandrolone decanoate on plasma lipids and coronary arteries of female cynomolgus macaques. *Metabolism* 45:463–468
  121. **Elhage R, Arnal JF, Pieraggi M-T, Duverger N, Fiévet C, Faye JC, Bayard F** 1997 17 $\beta$ -Estradiol prevents fatty streak formation in apolipoprotein E-deficient mice. *Arterioscler Thromb Vasc Biol* 17:2679–2684
  122. **von Dehn G, von Dehn O, Völker W, Langer C, Weinbauer GF, Behre HM, Nieschlag E, Assmann G, von Eckardstein A** 2001 Atherosclerosis in apolipoprotein E-deficient mice is decreased by the suppression of endogenous sex hormones. *Horm Metab Res* 33:110–114
  - 122a. **Nathan L, Shi W, Dinh H, Mukherjee TK, Wang X, Lusic AJ, Chaudhuri G** 2001 Testosterone inhibits early atherogenesis by conversion to estradiol: critical role of aromatase. *Proc Natl Acad Sci USA* 98:3589–3593
  123. **Barret-Connor EL** 1995 Testosterone and risk factors for cardiovascular disease in men. *Diabetes Metab* 21:156–161
  124. **De Pergola G** 2000 The adipose tissue metabolism: role of testosterone and dehydroepiandrosterone. *Int J Obes Relat Metab Disord* 24(Suppl 2):S59–S63
  125. **Caron P, Bennet A, Camare R, Louvet JP, Boneu S, Sie P** 1989 Plasminogen activator inhibitor in plasma is related to testosterone in men. *Metabolism* 38:1010–1015
  126. **Freedman DS, O'Brien TR, Flanders WD** 1991 Relation of serum testosterone levels to high density lipoprotein cholesterol and other characteristics in men. *Arterioscler Thromb* 11:307–315
  127. **Glueck CJ, Glueck HI, Stroop D, Speirs J, Hamer T, Tracy T** 1993 Endogenous testosterone, fibrinolysis, and coronary heart disease risk in hyperlipidemic men. *J Lab Clin Med* 122:412–420
  128. **Hämäläinen E, Adlercreutz H, Ehnholm C** 1986 Relationship of serum lipoproteins and apoproteins to the binding capacity of sex hormone binding globulin in healthy Finnish men. *Metabolism* 35:535–541
  129. **Kiel DP, Baron CA, Plymate SR** 1989 Sex hormones and lipoproteins in men. *Am J Med* 87:35–39
  130. **Yang XC, Jing TY, Gesnick LM, Phillips GB** 1993 Relation of hemostatic factors to other risk factors for coronary artery disease and to sex hormones in men. *Arterioscler Thromb* 13:467–471
  131. **Hergenc G, Schulte H, Assmann G, von Eckardstein A** 1999 Associations of obesity markers, insulin, and sex hormones with HDL

- cholesterol levels in Turkish and German individuals. *Atherosclerosis* 145:147–156
132. **Tchernof A, Labrie F, Belanger A, Despres JP** 1996 Obesity and metabolic complications: contribution of dehydroepiandrosterone and other steroid hormones. *J Endocrinol* 150(Suppl):S155–S64
  133. **Tsai EC, Boyko EJ, Leonetti DL, Fujimoto WY** 2000 Low serum testosterone level as a predictor of increased visceral fat in Japanese-American men. *Int J Obes Relat Metab Disord* 24:485–491
  134. **Simon D, Charles MA, Nahoul K, Orssaud G, Kremiski J, Hully V, Joubert E, Papoz L, Eschwege E** 1997 Association between plasma total testosterone and cardiovascular risk factors in healthy adult men: the Telecom study. *J Clin Endocrinol Metab* 82:682–685
  135. **Seidell JC, Björntorp P, Sjöström L, Kvist H, Sannerstedt R** 1990 Visceral fat accumulation in men is positively associated with insulin, glucose, and C-peptide levels but negatively with testosterone levels. *Metabolism* 39:897–901
  136. **Leenen R, van der Kooy K, Seidell JC, Deurenberg P, Koppe-schaar HP** 1994 Visceral fat accumulation in relation to sex hormones in obese men and women undergoing weight loss therapy. *J Clin Endocrinol Metab* 78:1515–1520
  137. **Stanick S, Dornfeld LP, Maxwell MH, Viosca A, Korenman SG** 1981 The effect of weight loss on reproductive hormones in obese men. *J Clin Endocrinol Metab* 53:828–832
  138. **Hautanen A** 2000 Synthesis and regulation of sex hormone-binding globulin in obesity. *Int J Obes Relat Metab Disord* 24(Suppl 2):S64–S70
  139. **Gascon F, Valle M, Martos R, Ruz FJ, Rios R, Montilla P, Canete R** 2000 Sex hormone-binding globulin as a marker for hyperinsulinemia and/or insulin resistance in obese children. *Eur J Endocrinol* 143:85–89
  140. **Pasquali R, Macor C, Vicennati V, Novo F, De lasio R, Mesini P, Boschi S, Casimirri F, Vettor R** 1997 Effects of acute hyperinsulinemia on testosterone serum concentrations in adult obese and normal-weight men. *Metabolism* 46:526–529
  141. **Björntorp P** 1996 The regulation of adipose tissue distribution in humans. *Int J Obes Relat Metab Disord* 20:291–302
  142. **Haffner SM, Valdez RA** 1995 Endogenous sex hormones: impact on lipids, lipoproteins, and insulin. *Am J Med* 98(Suppl 1A):S40–S47
  143. **Marin P, Odén B, Björntorp P** 1995 Assimilation and mobilization of triglycerides in subcutaneous abdominal and femoral adipose tissue *in vivo* in men: effects of androgens. *J Clin Endocrinol Metab* 80:239–243
  144. **Vermeulen A** 1996 Decreased androgen levels and obesity in men. *Ann Med* 28:13–15
  145. **Couillard C, Gagnon J, Bergeron J, Leon AS, Rao DC, Skinner JS, Wilmore JH, Despres JP, Bouchard C** 2000 Contribution of body fatness and adipose tissue distribution to the age variation in plasma steroids hormone concentration in men: the HERITAGE family study. *J Clin Endocrinol Metab* 85:1026–1031
  146. **Behre HM, Simoni M, Nieschlag E** 1997 Strong association between serum levels of leptin and testosterone in men. *Clin Endocrinol (Oxf)* 47:237–240
  147. **Sih R, Morley JE, Kaiser FE, Perry HM, Patrick P, Ross C** 1997 Testosterone replacement in older hypogonadal men: a 12-month randomized controlled trial. *J Clin Endocrinol Metab* 82:1661–1667
  148. **Wang C, Swedloff RS, Iranmanesh A, Dobs A, Snyder PJ, Cunningham G, Matsumoto AM, Weber T, Berman N** 2000 Transdermal testosterone gel improves sexual function, mood, muscle strength, and body composition parameters in hypogonadal men. Testosterone gel study group. *J Clin Endocrinol Metab* 85:2839–2853
  149. **Marin P, Holmäng S, Jönsson L, Sjöström L, Kvist H, Holm G, Lindstedt G, Björntorp P** 1992 The effects of testosterone treatment on body composition and metabolism in middle aged men. *Int J Obes Relat Metab Disord* 16:991–997
  150. **Marin P, Holmäng S, Gustafsson C, Jönsson L, Kvist H, Elander A, Eldh J, Sjöström L, Holm G, Björntorp P** 1993 Androgen treatment of abdominally obese men. *Obesity Res Relat Metab Disord* 1:245–251
  151. **Rebuffé-Scrive M, Marin P, Björntorp P** 1991 Effect of testosterone on abdominal adipose tissue in men. *Int J Obes Relat Metab Disord* 15:791–795
  152. **Büchter D, Behre HM, Kliesch S, Chirazi A, Nieschlag E, Assmann G, von Eckardstein A** 1999 Effects of testosterone suppression in young men by the gonadotropin releasing hormone antagonist cetrorelix on plasma lipids, lipolytic enzymes, lipid transfer proteins, insulin, and leptin. *Exp Clin Endocrinol Diabetes* 107:522–529
  153. **Björntorp P** 1993 Hyperandrogenicity in women—a prediabetic condition? *J Intern Med* 234:579–583
  154. **Björntorp P** 1994 Fatty acids, hyperinsulinemia, and insulin resistance: which comes first? *Curr Opin Lipidol* 5:166–174
  155. **Dieudonne MN, Pecquery R, Leneuve MC, Giudicelli Y** 2000 Opposite effects of androgens and estrogens on adipogenesis in rat preadipocytes: evidence for sex and site-related specificities and possible involvement of insulin-like growth factor 1 receptor and peroxisome proliferator-activated receptor gamma2. *Endocrinology* 141:649–656
  156. **Mantzoros CS, Dunaif A, Flier JS** 1997 Leptin concentrations in the polycystic ovary syndrome. *J Clin Endocrinol Metab* 82:1687–1691
  157. **Rouru J, Anttila L, Koskinen P, Penttila TA, Irjala K, Huupponen R, Koulu M** 1997 Serum leptin concentrations in women with polycystic ovary syndrome. *J Clin Endocrinol Metab* 82:1697–1700
  158. **Sherif K, Kushner H, Falkner BE** 1998 Sex hormone-binding globulin and insulin resistance in African-American women. *Metabolism* 47:70–74
  159. **Lindstedt G, Lundberg P, Lapidus L, Lundgren H, Bengtsson C, Björntorp P** 1991 Low sex hormone binding globulin concentration as an independent risk factor for development of NIDDM: 12 yr follow up of population study of women in Gothenburg. *Diabetes* 40:123–128
  160. **Wortsman J, Soler NG** 1982 Abnormalities of fuel metabolism in the polycystic ovary syndrome. *Obstet Gynecol* 60:342–345
  161. **Mattson LA, Cullberg G, Hamberger L, Samsioe G, Silverstolpe G** 1984 Lipid metabolism in women with polycystic ovary syndrome: possible implications for an increased risk for coronary heart disease. *Fertil Steril* 42:579–584
  162. **Wild RA, Palmer PC, Coulson PB, Carruth KB, Ranney GB** 1985 Lipoprotein lipid concentrations and cardiovascular risk in women with polycystic ovarian syndrome. *J Clin Endocrinol Metab* 61:946–951
  163. **Conway GS, Agrawal R, Betteridge DJ, Jacobs HS** 1992 Risk factors for coronary artery disease in lean and obese women with the polycystic ovary syndrome. *Clin Endocrinol (Oxf)* 37:119–125
  164. **Dahlgren E, Janson PO, Johansson S, Lapidus L, Oden A** 1992 Polycystic ovary syndrome and risk for myocardial infarction: evaluated from a risk factor model based on a prospective population study of women. *Acta Obstet Gynecol Scand* 71:599–604
  165. **Dahlgren E, Lapidus A, Janson P, Lindstedt G, Johansson S, Tengborn L** 1994 Hemostatic and metabolic variables in women with polycystic ovary syndrome. *Fertil Steril* 61:455–460
  166. **Talbot E, Guzik D, Clerici A, Berga S, Detre K, Weimer K and Kuller L** 1995 Coronary heart disease risk factors in women with polycystic ovary syndrome. *Arterioscler Thromb Vasc Biol* 15:821–826
  167. **Sampson M, Kong C, Patel A, Unwin R, Jacobs HS** 1996 Ambulatory blood pressure profiles and plasminogen activator inhibitor (PAI-1) activity in lean women with and without the polycystic ovary syndrome. *Clin Endocrinol (Oxf)* 45:623–629
  168. **von Eckardstein S, von Eckardstein A, Bender HG, Schulte H, Assmann G** 1996 Elevated low density lipoprotein -cholesterol in women with polycystic ovary syndrome. *Gynecol Endocrinol* 10:311–318
  169. **Fox R** 1999 Prevalence of a positive family history of type 2 diabetes in women with polycystic ovarian disease. *Gynecol Endocrinol* 13:390–393
  170. **Penttila TL, Koskinen P, Penttila TA, Anttila L, Irjala K** 1999 Obesity regulates bioavailable testosterone levels in women with or without polycystic ovary syndrome. *Fertil Steril* 71:457–461
  171. **Sozen I, Arici A** 2000 Hyperinsulinism and its interaction with hyperandrogenism in polycystic ovary syndrome. *Obstet Gynecol Surv* 55:321–328
  172. **Conway GS, Clark PM, Wong D** 1993 Hyperinsulinaemia in the polycystic ovary syndrome confirmed with a specific immunoradiometric assay for insulin. *Clin Endocrinol (Oxf)* 38:219–222
  173. **Chang RJ, Nakamura RM, Judd HL, Kaplan SA** 1983 Insulin

- resistance in nonobese patients with polycystic ovarian disease. *J Clin Endocrinol Metab* 57:356–359
174. **Dunaif A, Mandeli J, Fluhr H, Dobrjansky A** 1988 The impact of obesity on chronic hyperinsulinemia on gonadotropin release and gonadal steroid secretion in the polycystic ovary syndrome. *J Clin Endocrinol Metab* 66:131–139
  175. **Graf MJ, Richards CJ, Brown V, Meissner L, Dunaif A** 1990 The independent effects of hyperandrogenaemia, hyperinsulinaemia, and obesity on lipid and lipoprotein profiles in women. *Clin Endocrinol (Oxf)* 33:119–131
  176. **Haffner SM** 1996 Sex hormone-binding protein, hyperinsulinemia, insulin resistance and non-insulin-dependent diabetes. *Horm Res* 45:233–237
  177. **Holte J, Bergh T, Berne C, Lithell H** 1994 Serum lipoprotein lipid profile in women with the polycystic ovary syndrome: relation to anthropometric, endocrine and metabolic variables. *Clin Endocrinol (Oxf)* 41:463–471
  178. **Franks S, Gilling-Smith C, Watson H, Willis D** 1999 Insulin action in the normal and polycystic ovary. *Endocrinol Metab Clin North Am* 28:361–378
  179. **Acien P, Quereda F, Matallin P, Villarroya E, Lopez-Fernandez JA, Acien M, Mauri M, Alfayate R** 1999 Insulin, androgens, and obesity in women with and without polycystic ovary syndrome: a heterogeneous group of disorders. *Fertil Steril* 72:32–40
  180. **Nestler JE, Jakubowicz DJ, de Vargas AF, Brik C, Quintero N, Medina F** 1998 Insulin stimulates testosterone biosynthesis by human thecal cells from women with polycystic ovary syndrome by activating its own receptor and using inositolglycan mediators as the signal transduction system. *J Clin Endocrinol Metab* 83:2001–2005
  181. **Dunaif A, Thomas A** 2001 Current concepts in the polycystic ovarian syndrome. *Annu Rev Med* 52:401–419
  182. **Ehrmann DA, Cavaghan MK, Imperial J, Sturis J, Rosenfield RL, Polonsky KS** 1997 Effects of metformin on insulin secretion, insulin action, and ovarian steroidogenesis in women with polycystic ovary syndrome. *J Clin Endocrinol Metab* 82:524–530
  183. **Velazquez EM, Mendoza SG, Wang P, Glueck CJ** 1997 Metformin therapy is associated with a decrease in plasma plasminogen activator inhibitor 1, lipoprotein(a), and immunoreactive insulin levels in patients with the polycystic ovary syndrome. *Metabolism* 46:454–457
  184. **Pasquali R, Filicori M** 1998 Insulin sensitizing agents and polycystic ovary syndrome. *Eur J Endocrinol* 138:253–254
  185. **Kolodziejczyk B, Duleba AJ, Spaczynski RZ, Pawelczyk L** 2000 Metformin therapy decreases hyperandrogenism and hyperinsulinemia in women with polycystic ovary syndrome. *Fertil Steril* 73:1149–1154
  186. **Lemieux S, Lewis GF, Ben-Chetrit A, Steiner G, Greenblatt EM** 1999 Correction of hyperandrogenemia by laparoscopic ovarian cautery in women with polycystic ovarian syndrome is not accompanied by improved insulin sensitivity or lipid-lipoprotein levels. *J Clin Endocrinol Metab* 84:4278–4282
  187. **Dahlgren E, Landin K, Krotkiewski M, Holm G, Janson PO** 1998 Effects of two antiandrogen treatments on hirsutism and insulin sensitivity in women with polycystic ovary syndrome. *Hum Reprod* 13:2706–2711
  188. **Morghetti P, Tosi F, Castello R, Magnani CM, Negri C, Brun E, Furlani L, Caputo M, Muggeo M** 1996 The insulin resistance in women with hyperandrogenism is partially reversed by antiandrogen treatment: evidence that androgens impair insulin action in women. *J Clin Endocrinol Metab* 81:952–960
  189. **Diamanti-Kandaraki E, Mitrakou A, Raptis S, Tolis G, Duleba AJ** 1998 The effect of a pure antiandrogen receptor blocker, flutamide, on the lipid profile in the polycystic ovary syndrome. *J Clin Endocrinol Metab* 83:2699–705
  190. **Polderman KH, Gooren LJ, Asschermann H, Bakker A, Heine RJ** 1994 Induction of insulin resistance by androgens and estrogens. *J Clin Endocrinol Metab* 79:265–271
  191. **Elbers JM, de Jong S, Teerlink T, Asscheman H, Seidell JC, Gooren LJ** 1999 Changes in fat cell size and *in vitro* lipolytic activity of abdominal and gluteal adipocytes after a one-year cross-sex hormone administration in transsexuals. *Metabolism* 48:1371–1377
  192. **Lovejoy JC, Bray GA, Bourgeois MO, Macchiavelli R, Rood JC, Greeson C, Partington C** 1996 Exogenous androgens influence body composition and regional body fat distribution in obese postmenopausal women—a clinical research center study. *J Clin Endocrinol Metab* 81:2198–203
  193. **Diamond MP, Grainger D, Diamond MC, Sherwin RS, Defronzo RA** 1998 Effects of methyltestosterone on insulin secretion and sensitivity in women. *J Clin Endocrinol Metab* 83:4420–4425
  194. **Nilsson C, Niklasson M, Eriksson E, Bjorntorp P, Holmang A** 1998 Imprinting of female offspring with testosterone results in insulin resistance and changes in body fat distribution at adult age in rats. *J Clin Invest* 101:74–78
  195. **Eisner JR, Dumesic DA, Kemnitz JW, Abbott DH** 2000 Timing of prenatal androgen excess determines differential impairment in insulin secretion and action in adult female rhesus monkeys. *J Clin Endocrinol Metab* 85:1206–1210
  196. **Rosenfield RL** 1999 Ovarian and adrenal function in polycystic ovary syndrome. *Endocrinol Metab Clin North Am* 28:265–293
  197. **Nestler JE, Jakubowicz DJ, Reamer P, Gunn RD, Allan G** 1999 Ovarulatory and metabolic effects of D-chiro-inositol in the polycystic ovary syndrome. *N Engl J Med* 340:1314–1320
  198. **Després JP** 1998 The insulin resistance-dyslipidemic syndrome of visceral obesity: effect on patients' risk. *Obes Res* 6(Suppl 1):8S–17S
  199. **Goldberg IJ** 2001 Diabetic dyslipidemia: causes and consequences. *J Clin Endocrinol Metab* 86:965–971
  200. **Kirkland RT, Keenan BS, Probstfield JL, Patsch W, Tsai-Lien L, Clayton GW, Insull Jr W** 1987 Decrease in plasma high density lipoprotein cholesterol levels at puberty in boys with delayed adolescence: correlation with plasma testosterone levels. *JAMA* 257:502–507
  201. **Büchter D, von Eckardstein S, von Eckardstein A, Kamischke A, Simoni S, Behre HM, Nieschlag E** 1999 Clinical trial of a non-injectable male contraceptive: transdermal testosterone and oral levonorgestrel. *J Clin Endocrinol Metab* 84:1244–1249
  202. **Bagatell CJ, Heiman JR, Matsumoto AM, Rivier JE, Bremner WJ** 1994 Metabolic and behavioral effects of high dose exogenous testosterone in healthy men. *J Clin Endocrinol Metab* 79:561–567
  203. **Anderson RA, Wallace EM, Wu FCW** 1995 Effects of testosterone enanthate on serum lipoproteins in man. *Contraception* 52:115–119
  204. **Meriggiola MC, Bremner WJ, Paulsen CA** 1995 Testosterone enanthate at a dose of 200 mg/week decreases HDL-cholesterol levels in healthy men. *Int J Androl* 18:237–242
  205. **Wu FCW, Farley TMM, Peregoudov A, Waites GMH** 1996 Effects of exogenous testosterone in normal men: experience from a multicenter contraceptive efficacy study using testosterone enanthate. World Health Organization Task Force on Methods for the Regulation of Male Fertility. *Fertil Steril* 65:626–636
  206. **Bebb RA, Anawalt BD, Christensen RB, Paulsen CA, Bremner WJ, Matsumoto AM** 1996 Combined administration of levonorgestrel and testosterone induces more rapid and effective suppression of spermatogenesis than testosterone alone: a promising male contraceptive approach. *J Clin Endocrinol Metab* 81:757–762
  207. **Meriggiola MC, Bremner WJ** 1997 Progestin-androgen combination regimens for male contraception. *J Androl* 18:240–244
  208. **Wu FCW, Balasubramanian R, Mulders TMT, Coelingh-Bennink HJT** 1999 Oral progestogen combined with testosterone as a potential male contraceptive: additive effects between desogestrel and testosterone enanthate in suppression of spermatogenesis, pituitary-testicular axis and lipid metabolism. *J Clin Endocrinol Metab* 84:112–122
  209. **Anawalt BD, Bebb RA, Bremner WJ, Matsumoto AM** 1999 A lower dosage levonorgestrel and testosterone combination effectively suppresses spermatogenesis and circulating gonadotropin levels with fewer metabolic effects than higher dosage combinations. *J Androl* 20:407–414
  210. **Kamischke A, Venherm S, Ploger D, von Eckardstein S, Nieschlag E** 2001 Intramuscular testosterone undecanoate and norethisterone enanthate in a clinical trial for male contraception. *J Clin Endocrinol Metab* 86:303–309
  211. **Watts NB, Notelovitz M, Timmons MC, Addison WA, Wiita B, Downey LJ** 1995 Comparison of oral estrogens and estrogens plus androgen on bone mineral density, menopausal symptoms, and lipid-lipoprotein profiles in surgical menopause. *Obstet Gynecol* 85:529–537

212. **Buckler HM, McElhone K, Durrington PN, Mackness MI, Ludlam CA, Wu FC** 1998 The effects of low-dose testosterone treatment on lipid metabolism, clotting factors and ultrasonographic ovarian morphology in women. *Clin Endocrinol (Oxf)* 49:173–178
213. **Goh HH, Loke DF, Ratnam SS** 1995 The impact of long-term testosterone replacement therapy on lipid and lipoprotein profiles in women. *Maturitas* 21:65–70
214. **Simon JA** 2001 Safety of estrogen/androgen regimens. *J Reprod Med* 46(Suppl 3):281–290
215. **Penotti M, Sironi L, Cannata L, Viganò P, Casini A, Gabrielli L, Vignali M** 2001 Effects of androgen supplementation of hormone replacement therapy on the vascular reactivity of cerebral arteries. *Fertil Steril* 76:235–240
216. **Goldberg RB, Rabin D, Coelle GC, Getz GS** 1985 Suppression of plasma testosterone leads to increase in serum total and high density lipoprotein cholesterol and apoproteins A-I and B. *J Clin Endocrinol Metab* 60:203–207
217. **Bagatell CJ, Knopp RH, Vale WW, Rivier JE, Bremner WJ** 1992 Physiological testosterone levels in normal men suppress high-density lipoprotein cholesterol levels. *Ann Intern Med* 116:967–973
218. **Behre HM, Böckers A, Schlingheider A, Nieschlag E** 1994 Sustained suppression of serum LH, FSH, and testosterone and increase of high-density lipoprotein cholesterol by daily injections of the GnRH antagonist cetrorelix over 8 days in normal men. *Clin Endocrinol (Oxf)* 40:241–248
219. **von Eckardstein A, Kliesch S, Nieschlag E, Chirazi A, Assmann G, Behre HM** 1997 Suppression of endogenous testosterone in young men increases serum levels of HDL-subclass LpA-I and lipoprotein(a). *J Clin Endocrinol Metab* 82:3367–3372
220. **Eri LM, Urdal P** 1995 Effects of the nonsteroidal androgen casodex on lipoproteins, fibrinogen and plasminogen activator inhibitor in patients with benign prostatic hyperplasia. *Eur J Urol* 27:274–279
221. **Eri LM, Urdal P, Bechensteen AG** 1995 Effects of the luteinizing hormone-releasing hormone agonist leuprolide on lipoproteins, fibrinogen and plasminogen activator inhibitor in patients with benign prostatic hyperplasia. *J Urol* 154:100–104
222. **Denti L, Pasolini G, Cortellini P, Sanfelici L, Benedetti R, Cecchetti A, Ferretti S, Bruschi L, Ablondi F, Valenti G** 2000 Changes in HDL-cholesterol and lipoprotein Lp(a) after 6-month treatment with finasteride in males affected by benign prostatic hyperplasia (BPH). *Atherosclerosis* 152:159–166
223. **Moorjani S, Dupont A, Labrie F, Lupien PJ, Gagne C, Brun D, Giguere M, Belanger A, Cusan L** 1988 Changes in plasma lipoproteins during various androgen suppression therapies in men with prostatic carcinoma: effects of orchiectomy, estrogen, and combination treatment with luteinizing hormone-releasing hormone agonist and flutamide. *J Clin Endocrinol Metab* 66:314–322
224. **Bagatell CJ, Knopp RH, Bremner WJ** 1994 Physiological levels of estradiol stimulate plasma high density lipoprotein 2 cholesterol levels in normal men. *J Clin Endocrinol Metab* 78:855–861
225. **Tan KC, Shiu SW, Pang RW, Kung AW** 1998 Effects of testosterone replacement on HDL subfractions and apolipoprotein A-1 containing lipoproteins. *Clin Endocrinol (Oxf)* 48:187–194
226. **Tan KC, Shiu SW, Kung AW** 1999 Alterations in hepatic lipase and lipoprotein subfractions with transdermal testosterone replacement therapy. *Clin Endocrinol (Oxf)* 51:765–769
227. **Santamarina-Fojo S, Haudenschild C** 2000 Role of hepatic and lipoprotein lipase in lipoprotein metabolism and atherosclerosis: studies in transgenic and knockout animal models and somatic gene transfer. *Int J Tissue React* 22:39–47
228. **Valdemarsson S, Hedner P, Nilsson-Ehle P** 1987 Increase in hepatic lipase activity after testosterone substitution in men with hypogonadism of pituitary origin. *Acta Med Scand* 221:363–366
229. **Sorva R, Kuusi T, Taskinen MR, Perheentupa J, Nikkila EA** 1988 Testosterone substitution increases the activity of lipoprotein lipase and hepatic lipase in hypogonadal men. *Atherosclerosis* 69:191–197
230. **Jones DB, Higgins B, Billet JS, Price WH, Edwards CR, Beastall GH, Shepherd J, Sweeting VM, Horn DB, Wenham PR** 1989 The effect of testosterone replacement on plasma lipids and apolipoproteins. *Eur J Clin Invest* 19:438–441
231. **Thompson PD, Cullinane EM, Sady SP, Chenevery C, Saritelli AL, Sady MA** 1989 Contrasting effects of testosterone and stanozolol on serum lipoprotein levels. *JAMA* 261:1165–1168
232. **Jockenhövel F, Bullmann C, Schubert M, Vogel E, Reinhardt W, Reinwein D, Müller-Wieland D, Krone W** 1999 Influence of various modes of androgen substitution on serum lipids and lipoproteins in hypogonadal men. *Metabolism* 48:590–596
233. **Friedl DKE, Hannan CJ, Jones RE, Kettler TM, Plymate SR** 1990 High density lipoprotein cholesterol is not decreased if an aromatizable androgen is administered. *Metabolism* 39:69–77
234. **Hana V, Marek J, Ceska R, Sobra J, Hampl R, Starka L** 1991 Influence of testosterone isobutyrate on serum lipoproteins during replacement therapy of hypogonadal men. *Czech Med* 14:123–128
235. **Tenover JS** 1992 Effects of testosterone supplementation in the aging male. *J Clin Endocrinol Metab* 75:1092–1098
236. **Marcovina SM, Lippi G, Bagatell CJ, Bremner WJ** 1996 Testosterone-induced suppression of lipoprotein(a) in normal men: relation to basal lipoprotein(a) level. *Atherosclerosis* 122:89–95
237. **Snyder PJ, Peachey H, Berlin JA, Hannoush P, Haddad G, Dlewati A, Santanna J, Loh L, Lenrow DA, Holmes JH, Kapoor SC, Atkinson LE** 2000 Effects of testosterone replacement in hypogonadal men. *J Clin Endocrinol Metab* 85:2670–2677
238. **Zmuda JM, Fahrenbach MC, Younkin BT** 1993 The effect of testosterone aromatization on high density lipoprotein cholesterol levels and post-heparin lipolytic activity. *Metabolism* 39:69–77
239. **Morley JE, Perry III HM, Kaiser FE, Kraenzle D, Jensen J, Houston K, Mattammal M, Perry Jr HM** 1993 Effects of testosterone replacement therapy in old hypogonadal males: a preliminary study. *J Am Geriatr Soc* 41:149–152
240. **Zgliczynski S, Ossowski M, Slowinska-Szrednicka J, Brzezinska A, Zgliczynski W, Soszynski P, Chotkowska E, Szrednicki M, Sadowski Z** 1996 Effect of testosterone replacement therapy on lipids and lipoproteins in hypogonadal and elderly men. *Atherosclerosis* 121:35–43
241. **Tripathy D, Shah P, Lakshmy R, Reddy KS** 1998 Effect of testosterone replacement on whole body glucose utilization and other cardiovascular risk factors in males with idiopathic hypogonadotropic hypogonadism. *Horm Metab Res* 30:642–645
242. **Grinspoon S, Corcoran C, Parman K, Costello M, Rosenthal D, Anderson E, Stanley T, Schoenfeld D, Burrows B, Hayden D, Basgoz N, Klibanski A** 2000 Effects of testosterone and progressive resistance training in eugonadal men with AIDS wasting. A randomized, controlled trial. *Ann Intern Med* 133:348–355
243. **Bhasin S, Woodhouse L, Casaburi R, Singh AB, Bhasin D, Berman N, Chen X, Yarasheski KE, Magliano L, Dzekov C, Dzekov J, Bross R, Phillips J, Sinha-Hikim, I, Shen R, Storer TW** 2001 Testosterone dose-response relationships in healthy young men. *Am J Physiol Endocrinol Metab* 281:E1172–E1181
244. **Salehian B, Wang C, Alexander G, Davidson T, McDonald V, Berman N, Dudley RE, Ziel F, Swerdloff RS** 1995 Pharmacokinetics, bioefficacy, and safety of sublingual testosterone cyclodextrin in hypogonadal men: comparison to testosterone enanthate—a clinical research center study. *J Clin Endocrinol Metab* 80:3567–3575
245. **Uyanik BS, Ari Z, Gumus B, Yigitoglu MR, Arslan T** 1997 Beneficial effects of testosterone undecanoate on the lipoprotein profiles in healthy elderly men. A placebo controlled study. *Jpn Heart J* 38:73–82
246. **Bhasin S, Swerdloff RS, Steiner B, Peterson MA, Meridores T, Galmirini M, Pandian MR, Goldberg R, Berman N** 1992 A biodegradable testosterone microcapsule formulation provides uniform eugonadal levels of testosterone for 10–11 weeks in hypogonadal men. *J Clin Endocrinol Metab* 74:75–83
247. **Snyder PJ, Peachey H, Berlin JA, Rader D, Usher D, Loh L, Hannoush P, Dlewati A, Holmes JH, Santanna J, Strom BL** 2001 Effect of transdermal testosterone treatment on serum lipid and apolipoprotein levels in men more than 65 years of age. *Am J Med* 111:255–260
248. **Howell SJ, Radford JA, Adams JE, Smets EM, Warburton R, Shalet SM** 2001 Randomized placebo-controlled trial of testosterone replacement in men with mild Leydig cell insufficiency following cytotoxic chemotherapy. *Clin Endocrinol (Oxf)* 55:315–324
249. **Dobs AS, Bachorik PS, Arver S, Meikle AW, Sanders SW, Carmelli KE, Mazer NA** 2001 Interrelationships among lipoprotein levels, sex hormones, anthropometric parameters, and age in hypogonadal men treated for 1 year with a permeation-enhanced

- testosterone transdermal system. *J Clin Endocrinol Metab* 86:1026–1033
250. **Ly LP, Jimenez M, Zhuang TN, Celermajer DS, Conway AJ, Handelsman DJ** 2001 A double-blind, placebo-controlled, randomized clinical trial of transdermal dihydrotestosterone gel on muscular strength, mobility, and quality of life in older men with partial androgen deficiency. *J Clin Endocrinol Metab* 86:4078–4088
  251. **Hromadova M, Hacic T, Malatinsky E, Sklovsky A, Cervenakov I** 1989 Some measures of lipid metabolism in young sterile men before and after testosterone treatment. *Endocrinol Exp* 23:205–211
  252. **Ozata M, Yildirimkaya M, Bulur M, Yilmaz K, Bolu E, Corakci A, Gundogan MA** 1996 Effects of gonadotropin and testosterone treatment on lipoprotein(a), high density lipoprotein particles, and other lipoprotein levels in male hypogonadism. *J Clin Endocrinol Metab* 81:3372–3378
  253. **Brodsky IG, Balagopal P, Nair KS** 1996 Effects of testosterone replacement on muscle mass and muscle protein synthesis in hypogonadal men—a clinical research center study. *J Clin Endocrinol Metab* 81:3469–3475
  254. **Katznelson L, Finkelstein JS, Schoenfeld DA, Rosenthal DI, Anderson EJ, Klubanski A** 1996 Increase in bone density and lean body mass during testosterone administration in men with acquired hypogonadism. *J Clin Endocrinol Metab* 81:4358–4365
  255. **Arslanian S, Suprasongsin C** 1997 Testosterone treatment in adolescents with delayed puberty: changes in body composition, protein, fat, and glucose metabolism. *J Clin Endocrinol Metab* 82:3213–3220
  256. **Rabijewski M, Adamkiewicz M, Zgliczynski S** 1998 [The influence of testosterone replacement therapy on well-being, bone mineral density and lipids in elderly men.] *Pol Arch Med Wewn* 100:212–221
  257. **Whitsel EA, Boyko EJ, Matsumoto AM, Anawalt BD, Siscovick DS** 2001 Intramuscular testosterone esters and plasma lipids in hypogonadal men: a meta-analysis. *Am J Med* 111:261–269
  258. **Tenover JL** 2000 Experience with testosterone replacement in the elderly. *Mayo Clin Proc* 75(Suppl):S77–S82
  259. **Wu FC, Farley TM, Peregoudov A, Waites GM** 1996 Effects of testosterone enanthate in normal men: experience from a multicenter contraceptive efficacy study. World Health Organization Task Force on Methods for the Regulation of Male Fertility. *Fertil Steril* 65:626–636
  260. **von Eckardstein A, Nofer JR, Assmann G** 2001 HDL and coronary heart disease: role of cholesterol efflux and reverse cholesterol transport. *Arterioscler Thromb Vasc Biol* 20:13–27
  261. **von Eckardstein A, Assmann G** 2000 Prevention of coronary heart disease by raising of HDL cholesterol? *Curr Opin Lipidol* 11:627–637
  262. **Brinton EA, Eisenberg S, Breslow JL** 1994 Human HDL-cholesterol levels are determined by apoA-I fractional catabolic rate, which correlates inversely with estimates of HDL size. *Arterioscler Thromb* 14:707–720
  263. **Tang J, Srivastava RAK, Krul E S, Baumann D, Pflieger B A, Kitchens RT, Schonfeld G** 1991 *In vivo* regulation of apolipoprotein A-I gene expression by estradiol and testosterone occurs by different mechanisms in inbred strains of mice. *J Lipid Res* 32:1571–1585
  264. **Krieger M** 1999 Charting the fate of the “good cholesterol”: identification and characterization of the high-density lipoprotein receptor SR-BI. *Annu Rev Biochem* 68:523–558
  - 264a. **Langer C, Ganz B, Goepfert C, Engel T, Uehara Y, von Dehn G, Jansen H, Assmann G, von Eckardstein A** 2002 Testosterone up-regulates scavenger receptor BI and stimulates cholesterol efflux from macrophages. *Biochem Biophys Res Commun* 296:1051–1057
  265. **Glueck CJ, Gartside P, Fallat RW, Mendoza S** 1976 Effect of sex hormones on protamine inactivated and resistant postheparin plasma lipase. *Metabolism* 25:625–630
  266. **Peinado-Onsurbe J, Staels B, Vanderschueren D, Bouillon R, Auwerx J** 1993 Effects of sex steroids on hepatic and lipoprotein lipase activity and mRNA in the rat. *Horm Res* 40:184–188
  267. **Hobbs HH, White AL** 1999 Lipoprotein(a): intrigues and insights. *Curr Opin Lipidol* 10:225–236
  268. **Stein JH, Rosenson RS** 1997 Lipoprotein Lp(a) excess and coronary heart disease. *Arch Intern Med* 157:1170–1176
  269. **von Eckardstein A, Schulte H, Cullen P, Assmann G** 2001 Lipoprotein(a) further increases the risk of coronary events in men with high global cardiovascular risk. *J Am Coll Cardiol* 37:2434–2439
  270. **Nowak-Göttl U, Junker R, Koch, H-G Münchow, N Assmann G, von Eckardstein A** 1999 Increased lipoprotein (a) is an important risk factor for thromboembolism in childhood. *Circulation* 100:743–748
  271. **Nowak-Göttl U, Sonntag B, Cirkel U, Junker R, von Eckardstein A** 2000 Evaluation of lipoprotein(a) and genetic prothrombotic risk factors in patients with recurrent foetal loss. *Thromb Haemost* 83:350–351
  272. **Nowak-Göttl U, Junker R, von Eckardstein A, Kosch A, Nohe N, Schobess R, Ehrenforth S, Kruz WD** 2001 Risk of recurrent venous thrombosis in children with combined prothrombotic risk factors. *Blood* 97:858–862
  273. **Angelin B** 1997 Therapy for lowering lipoprotein(a) levels. *Curr Opin Lipidol* 8:337–341
  274. **Sacks FM, Walsh BW** 1994 Sex hormones and lipoprotein metabolism. *Curr Opin Lipidol* 5:236–240
  275. **Henriksson P, Angelin B, Berglund L** 1992 Hormonal regulation of serum Lp(a) levels. *J Clin Invest* 89:1166–1171
  276. **Berglund L, Carlström K, Stege R, Gottlieb C, Eriksson M, Angelin B, Henriksson P** 1996 Hormonal regulation of serum lipoprotein(a) levels: effects of parenteral administration of estrogen or testosterone in males. *J Clin Endocrinol Metab* 81:2633–2637
  277. **Zmuda JM, Thompson PD, Dickenson R, Bausserman LL** 1996 Testosterone decreases lipoprotein(a) in men. *Am J Cardiol* 77:1244–1247
  278. **Arrer E, Jungwirth A, Mack D, Frick J, Patsch W** 1996 Treatment of prostate cancer with gonadotropin releasing hormone analogue: effect on lipoprotein(a). *J Clin Endocrinol Metab* 81:2508–2511
  279. **Denti L, Pasolini G, Cortellini P, Ferretti S, Sanfelici L, Ablondi F, Valenti G** 1996 Effects of androgen suppression by gonadotropin-releasing hormone agonist and flutamide on lipid metabolism in men with prostate cancer: focus on lipoprotein(a). *Clin Chem* 42:1176–1181
  280. **Frazer KA, Narla G, Zhang JL, Rubin EM** 1995 The apolipoprotein(a) gene is regulated by sex hormones and acute phase inducers in YAC transgenic mice. *Nat Genet* 9:424–431
  281. **Su W, Campos H, Judge H, Walsh BW, Sacks FM** 1998 Metabolism of apo(a) and apoB100 of lipoprotein(a) in women: effect of postmenopausal estrogen replacement. *J Clin Endocrinol Metab* 83:3267–3276
  282. **Shlipak MG, Simon JA, Vittinghoff E, Lin F, Barrett-Connor E, Knopp RH, Levy RI, Hulley SB** 2000 Estrogen and progestin, lipoprotein(a), and the risk of recurrent coronary heart disease events after menopause. *JAMA*. 283:1845–1852
  283. **Ridker PM** 1999 Evaluating novel cardiovascular risk factors: can we better predict heart attacks? *Ann Intern Med* 130:933–937
  284. **Anderson RA, Ludlam CA, Wu FCW** 1995 Haemostatic effects of supraphysiological levels of testosterone in normal men. *Thromb Haemost* 74:693–697
  285. **Verheijen JH, Rijken DC, Chang GT, Preston FE, Kluft C** 1984 Modulation of rapid plasminogen activator inhibitor in plasma by stanazolol. *Thromb Haemost* 51:396–397
  286. **Bjarnasson NH, Bjarnason K, Haarbo J, Coelingh Bennink HJT, Christiansen C** 1997 Tibolone: influence on markers of cardiovascular disease. *J Clin Endocrinol Metab* 82:1752–1756
  287. **Crook D** 1999 Tibolone and the risk of arterial disease. *J Br Menopause Soc* 51:30–33
  288. **Winkler UH** 1996 Effects of androgens on haemostasis. *Maturitas* 24:147–155
  289. **Sobel MI, Winkel CA, Macy LB, Liao P, Bjornsson TD** 1995 The regulation of plasminogen activators and plasminogen activator inhibitor type 1 in endothelial cells by sex hormones. *Am J Obstet Gynecol* 173:801–808
  290. **Pilo R, Aharony D, Raz A** 1981 Testosterone potentiation of ionophore and ADP induced platelet aggregation: relationship to arachidonic acid metabolism. *Thromb Haemost* 46:538–542
  291. **The International Task Force for the Prevention of Coronary Heart Disease** 1998 Coronary heart disease: reducing the risk. *Nutr Metab Cardiovasc Dis* 205–271

292. **Expert Panel on Detection, Evaluation, and Treatment of High Blood Cholesterol in Adults (Adult Treatment Panel III)** 2001 Executive summary of the third report of The National Cholesterol Education Program (NCEP). *JAMA* 285:2486–2497
293. **Glass CK, Witztum JL** 2001 Atherosclerosis: the road ahead. *Cell* 104:503–516
294. **Ross R** 1999 Atherosclerosis—an inflammatory disease. *N Engl J Med* 340:115–126
295. **Zimmerman GA, McIntyre TM, Prescott SM** 1996 Adhesion and signaling in vascular cell-cell interactions. *J Clin Invest* 98:1699–1702
296. **Hutchison SJ, Sudhir K, Chou TM, Chatterjee K** 1997 Sex hormones and vascular reactivity. *Herz* 22:141–150
297. **St Clair RW** 1997 Effects of estrogens on macrophage foam cells: a potential target for the protective effects of estrogens on atherosclerosis. *Curr Opin Lipidol* 8:281–286
298. **Horwitz KB, Horwitz LD** 1982 Canine vascular tissues are targets for androgens, estrogens, progestins, and glucocorticoids. *J Clin Invest* 69:750–758
299. **Hanke H, Lenz C, Hess B, Spindler KD, Weidemann W** 2001 Effect of testosterone on plaque development and androgen receptor expression in the arterial vessel wall. *Circulation* 103:1382–1385
300. **Fujimoto R, Morimoto I, Morita E, Sugimoto H, Ito Y, Eto S** 1994 Androgen receptors, 5 $\alpha$  reductase activity and androgen-dependent proliferation of vascular smooth muscle cells. *J Steroid Biochem Mol Biol* 50:169–174
301. **Cutolo M, Villaggio B, Barone A, Sulli A, Accardo S, Granata OM, Castagnetta L** 1996 Primary cultures of human synovial macrophages metabolize androgens. *Ann NY Acad Sci* 784:534–541
302. **Khetawat G, Faraday N, Nealen ML, Vijayan KV, Bolton E, Noga SJ, Bray PF** 2000 Human megakaryocytes and platelets contain the estrogen receptor  $\beta$  and androgen receptor (AR): testosterone regulates AR expression. *Blood* 95:2289–2296
303. **Harada N, Sasano H, Murakami H, Ohkuma T, Nagura H, Takagi Y** 1999 Localized expression of aromatase in human vascular tissue. *Circ Res* 84:1285–1291
304. **Diano S, Horvath TL, Mor G, Register T, Adams M, Harada N, Naftolin F** 1999 Aromatase and estrogen receptor immunoreactivity in the coronary arteries of monkeys and human subjects. *Menopause* 6:21–28
305. **Sasano H, Murakami H, Shizawa S, Satomi S, Nagura H, Harada N** 1999 Aromatase and sex steroid receptors in human vena cava. *Endocr J* 46:233–242
306. **Schmidt M, Kreutz M, Loffler G, Scholmerich J, Straub RH** 2000 Conversion of dehydroepiandrosterone to downstream steroid hormones in macrophages. *J Endocrinol* 164:161–169
307. **Malinow MR, Moguelevsky JA, Lema B, Bur GE** 1963 Vascular and extravascular radioactivity after injection of estradiol-6,7 H<sub>3</sub> in the human being. *J Clin. Endocrinol Metab* 23:306–310
308. **Nakao J, Chang WC, Murota SI, Orimo H** 1981 Estradiol-binding sites in rat aortic smooth muscle cells in culture. *Atherosclerosis* 38:75–80
309. **Karas RH, Patterson BL, Mendelsohn ME** 1994 Human vascular smooth muscle cells contain functional estrogen receptor. *Circulation* 89:1943–1950
310. **Losordo DW, Kearney M, Kim EA, Jekanowski J, Isner JM** 1994 Variable expression of the estrogen receptor in normal and atherosclerotic coronary arteries of premenopausal women. *Circulation* 89:1501–1510
311. **Bayard F, Clamens S, Meggetto F, Blaes N, Delsol G, Faye JC** 1995 Estrogen synthesis, estrogen metabolism, and functional estrogen receptors in rat arterial smooth muscle cells in culture. *Endocrinology* 136:1523–1529
312. **Venkov CD, Rankin AB, Vaughan DE** 1996 Identification of authentic estrogen receptor in cultured endothelial cells. A potential mechanism for steroid hormone regulation of endothelial function. *Circulation* 94:727–733
313. **Ben-Hur H, Mor G, Insler V, Blickstein I, Amir-Zaltsman Y, Sharp A, Globerson A, Kohen F** 1995 Menopause is associated with a significant increase in blood monocyte number and a relative decrease in the expression of estrogen receptors in human peripheral monocytes. *Am J Reprod Immunol* 34:363–369
314. **Mendelsohn ME, Karas RH** 1999 The protective effects of estrogens on the cardiovascular system. *N Engl J Med* 340:1801–1811
315. **Kim-Schulze S, McGowan KA, Hubchack SC, Cid MC, Martin MB, Kleinman HK, Greene GL, Schnaper HW** 1996 Expression of an estrogen receptor by human coronary artery and umbilical vein endothelial cells. *Circulation* 94:1402–1407
316. **Hodges YK, Tung L, Yan XD, Graham JD, Horwitz KB, Horwitz LD** 1982 Estrogen receptors  $\alpha$  and  $\beta$ : prevalence of estrogen receptor  $\beta$  mRNA in human vascular smooth muscle and transcriptional effects. *Circulation* 101:1792–1791
317. **Razandi M, Pedram A, Greene GL, Levin ER** 1999 Cell membrane and nuclear receptors derive from a single transcript: studies of ER $\alpha$  and ER $\beta$  expressed in CHO cells. *Mol Endocrinol* 13:307–319
318. **Honda H, Unemoto T, Kogo H** 1999 Different mechanisms for testosterone-induced relaxation of aorta between normotensive and spontaneously hypertensive rats. *Hypertension* 34:1232–1236
319. **Benten WP, Lieberherr M, Giese G, Wrehlke C, Guo Z, Wunderlich F** 1999 Functional testosterone receptors in plasma membranes of T cells. *FASEB J* 13:123–133
320. **Brann DW, Hendry LB, Mahesh VB** 1995 Emerging diversities in the mechanism of action of steroid hormones. *J Steroid Biochem Mol Biol* 52:113–133
321. **McGill HC, Sheridan PJ** 1981 Nuclear uptake of sex steroid hormones in the cardiovascular system of the baboon. *Circ Res* 48:238–244
322. **Lieberherr M, Grosse B** 1994 Androgens increase intracellular calcium concentration and inositol 1,4,5-trisphosphate and diacylglycerol formation via a pertussis toxin-sensitive G-protein. *J Biol Chem* 269:7217–7223
323. **De Caterina R** 2000 Endothelial dysfunctions: common denominators in vascular disease. *Curr Opin Lipidol* 11:9–23
324. **Griedling KK, Alexander RW** 1996 Endothelial control of the cardiovascular system: recent advances. *FASEB J* 10:283–292
325. **Fuster V** 1994 Mechanisms lead to myocardial infarction: insights from studies in vascular biology. *Circulation* 90:2126–2146
326. **Libby P** 1995 Molecular bases of the acute coronary syndromes. *Circulation* 91:2844–2850
327. **Austin CE** 2000 Chronic and acute effects of oestrogens on vascular contractility. *J Hypertens* 18:1365–1378
328. **Shaul PW** 2000 Novel role of estrogen receptors in vascular endothelium. *Semin Perinatol* 24:70–74
329. **Sudhir K, Komesaroff PA** 1999 Cardiovascular actions of estrogens in men. *J Clin Endocrinol Metab* 84:3411–3415
330. **Nathan L, Chaudhuri G** 1997 Estrogens and atherosclerosis. *Annu Rev Pharmacol Toxicol* 37:477–515
331. **White MM, Zamudio S, Stevens T, Cid MC, Martin MB, Kleinman HK, Greene GL, Schnaper HW** 1995 Estrogen, progesterone and vascular reactivity: potential cellular mechanisms. *Endocr Rev* 16:739–751
332. **McCrohon JA, Walters WAW, Robinson JC, McCredie RJ, Turner L, Adams MR, Handelsman DJ, Celermajer DS** 1997 Arterial reactivity is enhanced in genetic males taking high dose estrogens. *J Am Coll Cardiol* 29:1432–1436
333. **New G, Timmins KL, Duffy SJ, Tran BT, O'Brien RC, Harper RW, IT Meredith IA** 1997 Long-term estrogen therapy improves vascular function in male to female transsexuals. *J Am Coll Cardiol* 29:1437–1444
334. **McCredie RJ, McCrohon JA, Turner L, Griffiths KA, Handelsman DJ, Celermajer DS** 1998 Vascular reactivity is impaired in genetic females taking high-dose androgens. *J Am Coll Cardiol* 32:1331–1335
335. **Herman SM, Robinson JTC, McCredie RJ, Adams MR, Boyer MJ, Celermajer DS** 1997 Androgen deprivation is associated with enhanced endothelium-dependent dilatation in adult men. *Arterioscler Thromb Vasc Biol* 17:2004–2009
336. **Zitzmann M, Brune M, Kornmann B, Gromoll J, von Eckardstein S, von Eckardstein A, Nieschlag E** 2001 The CAG repeat polymorphism in the AR gene affects high density lipoprotein cholesterol and arterial vasoreactivity. *J Clin Endocrinol Metab* 86:4867–4873
337. **Ong PJ, Patrizi G, Chong WC, Webb CM, Hayward CS, Collins P** 2000 Testosterone enhances flow-mediated brachial artery reactivity in men with coronary artery disease. *Am J Cardiol* 85:269–272



338. **Worboys S, Kotsopoulos, Teede H, McGrath B, David SR** 2001 Evidence that parenteral testosterone therapy may improve endothelium-dependent and independent vasodilatation in postmenopausal women already receiving estrogen. *J Clin Endocrinol Metab* 88:158–161
339. **Chou TM, Sudhir K, Hutchison SJ, Ko E, Amidon TM, Collins P, Chatterjee K** 1996 Testosterone induces dilatation of canine coronary conductance and resistance arteries *in vivo*. *Circulation* 94:2614–2619
340. **Costarella CE, Stallone JN, Rutecki GW, Whittier FC** 1996 Testosterone causes direct relaxation of rat thoracic aorta. *J Pharmacol Exp Ther* 277:34–39
341. **Farhat MY, Wolfe R, Vargas R, Foegh ML, Ramwell PW** 1995 Effect of testosterone treatment on vasoconstrictor response of left anterior descend coronary artery in male and female pigs. *J Cardiovasc Pharmacol* 25:495–500
342. **Yue P, Chatterjee K, Beale C, Poole-Wilson PA, Collins P** 1995 Testosterone relaxes rabbit coronary arteries and aorta. *Circulation* 91:1154–1160
343. **Teoh H, Quan A, Leung SW, Man RY** 2000 Differential effects of 17 $\beta$ -estradiol and testosterone on the contractile responses of porcine coronary arteries. *Br J Pharmacol* 129:1301–1308
344. **Quan A, Teoh H, Man RY** 1999 Acute exposure to a low level of testosterone impairs relaxation in porcine coronary arteries. *Clin Exp Pharmacol Physiol* 26:830–832
345. **Ceballos G, Figueroa L, Rubio I, Gallo G, Garcia A, Martinez A, Yanez R, Perez J, Morato T, Chamorro G** 1999 Acute and nongenomic effects of testosterone on isolated and perfused rat heart. *J Cardiovasc Pharmacol* 33:691–697
346. **Hutchison SJ, Sudhir K, Chou TM, Sievers RE, Zu BQ, Sun YP, Deedwania PC, Gintz SA, Parmely WW, Chatterjee K** 1997 Testosterone worsens endothelial dysfunction associated with hypercholesterolemia and environmental tobacco smoke exposure in male rabbit aorta. *J Am Coll Cardiol* 29:800–807
347. **Geary GG, Krause DN, Duckles SP** 2000 Gonadal hormones affect diameter of male rat cerebral arteries through endothelium-dependent mechanisms. *Am J Physiol Heart Circ Physiol* 279:H610–H618
348. **Hishikawa K, Nakaki T, Marumo T, Suzuki H, Kato R, Saruta T** 1995 Up-regulation of nitric oxide synthase by estradiol in human aortic endothelial cells. *FEBS Lett* 360:291–295
349. **Murphy JG, Khalil RA** 1999 Decreased  $[Ca^{2+}]_i$  during inhibition of coronary smooth muscle contraction by 17 $\beta$ -estradiol, progesterone, and testosterone. *J Pharmacol Exp Ther* 291:44–45
350. **Matsuda A, Mathur A, Halushka PV** 1995 Testosterone increases thromboxane A2 receptors in cultured rat smooth muscle cells. *Circ Res* 69:638–643
351. **Blumenthal RS, Brinker JA, Resar JR, Gloth ST, Zacur HA, Coombs V, Gerstenblith G, Reis SE** 1997 Long-term estrogen therapy abolishes acute estrogen-induced coronary flow augmentation in postmenopausal women. *Am Heart J* 133:323–328
352. **Al-Khalili F, Landgren BM, Eksborg S, Franco-Cereceda A, Schenck-Gustafsson K** 1998 Does sublingual 17 $\beta$ -oestradiol have any effects on exercise capacity and myocardial ischaemia in postmenopausal women with stable coronary artery disease? *Eur Heart J* 19:1019–1026
353. **Anderson TJ** 1998 Acute effect of estrogen on metabolic coronary vasodilator responses to atrial pacing in postmenopausal women. *Am J Cardiol* 82:236–239
354. **de Winther MP, van Dijk KW, Havekes LM, Hofker MH** 2000 Macrophage scavenger receptor class A: a multifunctional receptor in atherosclerosis. *Arterioscler Thromb Vasc Biol* 20:290–297
355. **Jessup W, Kritharides L** 2000 Metabolism of oxidized LDL by macrophages. *Curr Opin Lipidol* 11:473–481
356. **Tabas I** 2000 Cholesterol and phospholipid metabolism in macrophages. *Biochim Biophys Acta* 1529:164–174
357. **Zhu XD, Bonet B, Knopp RH** 1997 17 $\beta$ -Estradiol, progesterone, and testosterone inversely modulate low density lipoprotein oxidation and cytotoxicity in cultured placental trophoblast and macrophages. *Am J Obstet Gynecol* 177:196–209
358. **Aikawa K, Furuchi T, Fujimoto Y, Arai H, Inoue K** 1994 Structure-specific inhibition of lysosomal cholesterol transport in macrophages by various steroids. *Biochim Biophys Acta* 1213:127–134
359. **Tomita T, Sawamura F, Uetsuka R, Chiba T, Miura S, Ikeda M, Tomita I** 1996 Inhibition of cholesteryl ester accumulation by 17 $\beta$ -estradiol in macrophages through activation of neutral cholesterol esterase. *Biochim Biophys Acta* 1300:210–218
360. **Fluiter K, van der Westhuijzen DR, van Berkel, TJ** 1998 *In vivo* regulation of scavenger receptor BI and the selective uptake of high density lipoprotein cholesteryl esters in rat liver parenchymal and Kupffer cells. *J Biol Chem* 273:8434–8438
361. **Hayes R, Chalmers SA, Nikolic-Paterson DJ, Atkins RC, Hedger MP** 1996 Secretion of bioactive interleukin 1 by rat testicular macrophages *in vitro*. *J Androl* 17:41–49
362. **Yoshida Y, Nakamura Y, Sugino N, Shimamura K, Ono M, Kato H** 1996 Changes in interleukin 1 production of peritoneal macrophages during estrous cycle in golden hamsters. *Endocrine J* 43:151–156
363. **D'Agostino P, Milano S, Barbera C, Di Bella G, La Rosa M, Ferlazzo V, Farruggio R, Miceli DM, Miele M, Castagnetta L, Cillari E** 1999 Sex hormones modulate inflammatory mediators produced by macrophages. *Ann NY Acad Sci* 876:426–429
364. **Owens GK** 1995 Regulation and differentiation of vascular smooth muscle cells. *Physiol Rev* 75:487–517
365. **Akishita M, Ouchi Y, Miyoshi H, Kozaki K, Inoue S, Ishikawa M, Eto M, Toba K, Orimo H** 1997 Estrogen inhibits cuff-induced intimal thickening of rat femoral artery: effects on migration and proliferation of vascular smooth muscle cells. *Atherosclerosis* 130:1–10
366. **Kolodgie FD, Jacob A, Wilson PS, Carlson GC, Farb A, Verma A, Virmani R** 1996 Estradiol attenuates directed migration of vascular smooth muscle cells *in vitro*. *Am J Pathol* 148:969–976
367. **Ajayi AA, Mathur R, Halushka PV** 1995 Testosterone increases human platelet thromboxane A2 receptor density and aggregation responses. *Circulation* 91:2742–2747
368. **Matsuda K, Mathur RS, Duzic E, Halushka PV** 1993 Androgen regulation of thromboxane A2/prostaglandin H2 receptor expression in human erythroleukemia cells. *Am J Physiol* 265:E928–E934
369. **Matsuda K, Ruff A, Morinelli TA, Mathur RS, Halushka PV** 1994 Testosterone increases thromboxane A2 receptor density and responsiveness in rat aortas and platelets. *Am J Physiol* 267:H887–H893
370. **Vermeulen A** 1995 Dehydroepiandrosterone sulfate and ageing. *Ann NY Acad Sci* 774:121–127
371. **Birkenhager-Gillesse EG, Derksen J, Lagaay AM** 1994 Dehydroepiandrosterone sulphate (DHEAS) in the oldest old, aged 85 and over. *Ann NY Acad Sci* 719:543–552
372. **Nafziger AN, Herrington DM, Bush TL** 1991 Dehydroepiandrosterone and Dehydroepiandrosterone sulfate: their relation to cardiovascular disease. *Epidemiol Rev* 13:267–293
373. **Ebeling P, Koivisto VA** 1994 Physiological importance of dehydroepiandrosterone. *Lancet* 343:1479–1481
374. **Khaw KT** 1996 Dehydroepiandrosterone, dehydroepiandrosterone sulphate and cardiovascular disease. *J Endocrinol* 150(Suppl):S149–S153
375. **Labrie F, Belanger A, Luu-The V, Labrie C, Simard J, Cusan L, Gomez JL, Candas B** 1998 DHEA and the intracrine formation of androgens and estrogens in peripheral target tissues: its role during aging. *Steroids* 63:322–328
376. **Kask E** 1959 17-Ketosteroids and arteriosclerosis. *Angiology* 10:358–368
377. **Barrett-Connor E, Khaw KT, Yen SSC** 1986 A prospective study of dehydroepiandrosterone sulfate, mortality, and cardiovascular disease. *N Engl J Med* 315:1519–1524
378. **Herrington DM, Gordon GB, Achuff SC, Trejo JF, Weisman HF, Kwiterovich Jr PO, Pearson TA** 1990 Plasma dehydroepiandrosterone and dehydroepiandrosterone sulfate in patients undergoing diagnostic coronary angiography. *J Am Coll Cardiol* 16:862–870
379. **LaCroix AZ, Yano K, Reed DM** 1992 Dehydroepiandrosterone sulfate, incidence of myocardial infarction, and extent of atherosclerosis in men. *Circulation* 86:1529–1535
380. **Ishihara F, Hiramatsu K, Shigematsu S, Aizawa T, Niwa A, Takasu N, Yamada T, Matsuo K** 1992 Role of adrenal androgens in the development of arteriosclerosis as judged by pulse wave velocity and calcification of the aorta. *Cardiology* 80:332–338
381. **Herrington DM** 1995 Dehydroepiandrosterone and coronary atherosclerosis. *Ann NY Acad Sci* 774:271–280

382. **Barrett-Connor E, Goodman-Gruen D** 1995 The epidemiology of DHEAS and cardiovascular disease. *Ann NY Acad Sci* 774:259–270
383. **Newcomer LM, Manson JE, Barbieri RL, Hennekens CH, Stampfer MJ** 1994 Dehydroepiandrosterone sulfate and the risk of myocardial infarction in US male physicians: a prospective study. *Am J Epidemiol* 140:870–875
384. **Berr C, Lafon S, Debuire B, Dartigues J-F, Baulieu E-E** 1996 Relationships of dehydroepiandrosterone sulfate in the elderly with functional, psychological and mental status and short-term mortality: a French community-based study. *Proc Natl Acad Sci USA* 93:13410–13415
385. **Jansson JH, Nilsson TK, Johnson O** 1998 von Willebrand factor, tissue plasminogen activator, and dehydroepiandrosterone sulphate predict cardiovascular death in a 10 year follow up of survivors of acute myocardial infarction. *Heart* 80:334–337
386. **Tilvis RS, Kahonen M, Harkonen M** 1999 Dehydroepiandrosterone sulfate, diseases and mortality in a general aged population. *Aging (Milano)* 11:30–34
387. **Kiechl S, Willeit J, Bonora E, Schwarz S, Xu Q** 2000 No association between dehydroepiandrosterone sulfate and development of atherosclerosis in a prospective population study (Bruneck Study). *Arterioscler Thromb Vasc Biol* 20:1094–1100
388. **Trevedi DP, Khaw KT** 2001 Dehydroepiandrosterone sulfate and mortality in elderly men and women. *J Clin Endocrinol Metab* 86:4171–4177
389. **Barrett-Connor EL, Khaw KT** 1987 Absence of an inverse relation of dehydroepiandrosterone sulfate with cardiovascular mortality in postmenopausal women. *N Engl J Med* 317:711
390. **Moriyama Y, Yasue H, Yoshimura M, Mizuno Y, Nishiyama K, Tsunoda R, Kawano H, Kugiyama K, Ogawa H, Saito Y, Nakao K** 2000 The plasma levels of dehydroepiandrosterone sulfate are decreased in patients with chronic heart failure in proportion to the severity. *J Clin Endocrinol Metab* 85:1834–1840
391. **Barrett-Connor EL, Goodman-Gruen D** 1995 Dehydroepiandrosterone sulfate does not predict cardiovascular death in postmenopausal women. *Circulation* 15:1757–1760
392. **Slowinska-Srzednicka J, Malczewska B, Srzednicki M, Chotkowska E, Brzezinska A, Zgliczynski W, Ossowski M, Jeske W, Zgliczynski S, Sadowski Z** 1995 Hyperinsulinaemia and decreased plasma levels of dehydroepiandrosterone sulfate in premenopausal women with coronary heart disease. *J Intern Med* 237:465–472
393. **Nestler JE, Barlascini CO, Clore JN, Blackard WG** 1988 Dehydroepiandrosterone reduces serum low density lipoprotein levels and body fat but does not alter insulin sensitivity in normal men. *J Clin Endocrinol Metab* 66:57–61
394. **Morales AJ, Nolan JJ, Nelson JC, Yen SSC** 1994 Effects of replacement dose of dehydroepiandrosterone in men and women of advancing age. *J Clin Endocrinol Metab* 78:1360–1367
395. **Khoram O, Vu L, Yen SSC** 1997 Activation of immune function by dehydroepiandrosterone (DHEA) in age-advanced men. *J Gerontol A Biol Sci Med Sci* 52:M1–M7
396. **Nippoldt TB, Nair KS** 1998 Is there a case for DHEA replacement? *Bailliere's Clin Endocrinol Metab* 12:507–520
397. **Arlt W, Justl H-G, Callies F, Reincke M, Hübler D, Oettel M, Ernst M, Schulte HM, Allolio B** 1998 Oral dehydroepiandrosterone for adrenal androgen replacement: pharmacokinetics and peripheral conversion to androgens and estrogens in young healthy females after dexamethasone suppression. *J Clin Endocrinol Metab* 83:1928–1934
398. **Arlt W, Haas J, Callies F, Reincke M, Hubler D, Oettel M, Ernst M, Schulte HM, Allolio B** 1999 Dehydroepiandrosterone replacement in women with adrenal insufficiency. *N Engl J Med* 341:1013–1020
399. **Wolf OT, Kirschbaum C** 1999 Actions of dehydroepiandrosterone (DHEA) and its sulfate (DHEAS) in the central nervous system (CNS): effects on cognition and emotion in animals and humans. *Brain Res* 30:264–288
400. **Legrain S, Massien C, Lahlou M, Roger M, Debuer B, Diquet B, Chatellier G, Azizi M, Faucounau V, Prochet H, Forette F, Baulieu E-E** 2000 Dehydroepiandrosterone replacement administration: pharmacokinetic and pharmacodynamic studies in healthy elderly subjects. *J Clin Endocrinol Metab* 85:3208–3217
401. **Hunt PJ, Gurnell EM, Huppert FA, Richards C, Prevost AT, Wass JAH, Herbert J, Chatterjee VKK** 2000 Improvement in mood and fatigue after dehydroepiandrosterone replacement in Addison's disease in a randomized, double blind trial. *J Clin Endocrinol Metab* 85:4650–4656
402. Deleted in proof
403. **Flynn MA, Weaver-Osterholtz D, Sharper-Timms KL, Allen S, Krause G** 1999 Dehydroepiandrosterone replacement in aging human. *J Clin Endocrinol Metab* 84:1527–1533
404. **Arlt W, Callies F, Koehler I, van Vlijmen JC, Fassnacht M, Strasburger CJ, Seibel MJ, Huebler D, Ernst M, Oettel M, Reincke M, Schulte HM, Allolio B** 2001 Dehydroepiandrosterone supplementation in healthy men with an age-related decline of dehydroepiandrosterone secretion. *J Clin Endocrinol Metab* 86:4686–4692
405. **Gordon GB, Bush DE, Weisman HF** 1988 Reduction of atherosclerosis by administration of dehydroepiandrosterone: a study in the hypercholesterolemic New Zealand white rabbit with aortic intimal injury. *J Clin Invest* 82:58–64
406. **Arad Y, Badimon JJ, Badimon L, Hembree WC, Ginsberg HN** 1989 Dehydroepiandrosterone feeding prevents aortic fatty streak formation and cholesterol accumulation in cholesterol-fed rabbits. *Arteriosclerosis* 9:159–165
407. **Eich DM, Nestler JE, Johnson DE, Dworkin GH, Ko D, Wechsler AS, Hess ML** 1993 Inhibition of accelerated coronary atherosclerosis with dehydroepiandrosterone in the heterotopic rabbit model of cardiac transplantation. *Circulation* 87:261–265
408. **Hayashi T, Esaki T, Muto E, Kano H, Asai Y, Thakur NK, Sumi D, Jayachandran M, Iguchi A** 2000 Dehydroepiandrosterone retards atherosclerosis formation through its conversion to estrogen: the possible role of nitric oxide. *Arterioscler Thromb Vasc Biol* 20:782–792
409. **Beer NA, Jakubiwitz DJ, Matt DW, Beer RM, Nestler JE** 1996 Dehydroepiandrosterone reduces plasma plasminogen activator inhibitor type 1 and tissue plasminogen activator antigen in men. *Am J Med Sci* 311:205–210
410. **Jesse RL, Loesser K, Eich DM, Qian YZ, Hess ML, Nestler JE** 1995 Dehydroepiandrosterone inhibits human platelet aggregation *in vitro* and *in vivo*. *Ann NY Acad Sci* 774:281–290
411. **Taniguchi S, Yanase T, Kobayashi K, Takayanagi R, Nawata H** 1996 Dehydroepiandrosterone markedly inhibits the accumulation of cholesteryl ester in mouse macrophage J774–1 cells. *Atherosclerosis* 126:143–154
412. **Furutama D, Fukui R, Amakawa M, Ohsawa N** 1998 Inhibition of migration and proliferation of vascular smooth muscle cells by dehydroepiandrosterone sulfate. *Biochim Biophys Acta* 1406:107–114
413. **Padgett DA, Loria RM** 1998 Endocrine regulation of murine macrophage function: effects of dehydroepiandrosterone, androstenediol and androstenediol. *J Neuroimmunol* 84:61–68
414. **Straub RH, Konecna L, Hrach S, Rothe G, Kreutz M, Scholmerich J, Falk W, Lang B** 1998 Serum dehydroepiandrosterone (DHEA) and DHEA sulfate are negatively correlated with serum Interleukin-6 (IL-6), and DHEA inhibits IL-6 secretion from mononuclear cells in man *in-vitro*: possible link between endocrinosenescence and immunosenescence. *J Clin Endocrinol Metab* 83:2012–2017
415. **Danenberg HD, Alpert G, Lustig S, Ben-Nathan D** 1992 Dehydroepiandrosterone protects mice from endotoxin toxicity and reduces tumor necrosis factor production. *Antimicrob Agents Chemother* 36:2275–2279
416. **Kimura M, Tanaka S, Yamada Y, Kiuchi Y, Yamakawa T, Sekihara H** 1998 Dehydroepiandrosterone decreases serum tumor necrosis factor  $\alpha$  and restores insulin sensitivity: independent effect from secondary weight reduction in genetically obese Zucker fatty rats. *Endocrinology* 129:3249–3253
417. **Morishima A, Grumbach MM, Simpson ER, Fisher C, Qin K** 1995 Aromatase deficiency in male and female siblings caused by a novel mutation and the physiological role of estrogens. *J Clin Endocrinol Metab* 80:3689–3698
418. **Carani C, Qin K, Simoni M, Faustini-Fustini M, Serpente S, Boyd J, Korach KS, Simpson ER** 1997 Effect of testosterone and oestradiol in a man with aromatase deficiency. *New Engl J Med* 337:91–95
419. **Smith EP, Boyd J, Frank GR, Takahashi H, Cohen RM, Specker**

- B, Williams TC, Lubahn DB, Korach KS** 1994 Estrogen resistance caused by a mutation in the estrogen-receptor gene in a man. *N Engl J Med* 331:1056–1061
420. **Sudhir K, Chou TM, Chatterjee K, Smith EP, Williams TC, Kane JP, Malloy MJ, Korach KS, Rubanyi GM** 1997 Premature coronary artery disease associated with a disruptive mutation in the estrogen receptor gene in a man. *Circulation* 96:3774–3777
421. **Sudhir K, Chou TM, Messina LM, Hutchison SJ, Korach KS, Chatterjee K, Rubanyi GM** 1997 Endothelial dysfunction in a man with disruptive mutation in oestrogen-receptor gene. *Lancet* 349: 1146–1147
422. **Ohlsson C, Hellberg N, Parini P, Vidal O, Bohlooly M, Rudling M, Lindberg MK, Warner M, Angelin B, Gustafsson JA** 2000 Obesity and disturbed lipoprotein profile in estrogen receptor- $\alpha$ -deficient male mice. *Biochem Biophys Res Commun* 278:640–645
423. **Nemoto Y, Toda K, Ono M, Fujikawa-Adachi K, Saibara T, Onishi S, Enzan H, Okada T, Shizuta Y** 2000 Altered expression of fatty acid-metabolizing enzymes in aromatase-deficient mice. *J Clin Invest* 105:1819–1825
424. **Heine PA, Taylor JA, Iwamoto GA, Lubahn DB, Cooke PS** 2000 Increased adipose tissue in male and female estrogen receptor- $\alpha$  knockout mice. *Proc Natl Acad Sci USA* 97:12729–12734
425. **Rubanyi GM, Frey AD, Kauser K, Sukovich D, Burton G, Lubahn DB, Couse JF, Curtis SW, Korach KS** 1997 Vascular estrogen receptors and endothelium-derived nitric oxide production in the mouse aorta. *J Clin Invest* 99:2429–2437
426. **Nilsson BO, Ekblad E, Heine T, Gustafsson J** 2000 Increased magnitude of relaxation to oestrogen in aorta from oestrogen receptor  $\beta$  knock-out mice. *J Endocrinol* 166:R5–R9
427. **Polson DW, Adams J, Wadsworth J, Franks S** 1988 Polycystic ovaries—a common finding in normal women. *Lancet* 1:870–872
428. **Knochenhauer ES, Key TJ, Kahsar-Miller M, Waggoner W, Boots LR, Azziz R** 1998 Prevalence of polycystic ovarian syndrome in unselected black and white women of the southeastern United States: a prospective study. *J Clin Endocrinol Metab* 83:3078–3082
429. **Barbieri RL** 2000 Induction of ovulation in infertile women with hyperandrogenism and insulin resistance. *Am J Obstet Gynecol* 183:1412–1418
430. **National Heart, Lung, and Blood Institute** 2000 Morbidity and mortality: 2000 chart book on cardiovascular, lung and blood diseases. Bethesda, MD: National Institute of Health; p 34
